# Supplementary material
Source: PubMed Central journal article supplement (PMC3760262)
Supplement: NIHMS494883-supplement-Supplement.pdf [file NIHMS494883-supplement-Supplement.pdf]

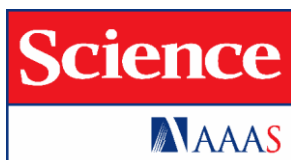

## Supplementary Materials for

### **Circulating Breast Tumor Cells Exhibit Dynamic Changes in Epithelial and Mesenchymal Composition**

Min Yu, Aditya Bardia, Ben S. Wittner, Shannon L. Stott, Malgorzata E. Smas, David T. Ting, Steven J. Isakoff, Jordan C. Ciciliano, Marissa N. Wells, Ajay M. Shah, Kyle F. Concannon, Maria C. Donaldson, Lecia V. Sequist, Elena Brachtel, Dennis Sgroi, Jose Baselga, Sridhar Ramaswamy, Mehmet Toner, Daniel A. Haber,\* Shyamala Maheswaran\*

\*To whom correspondence should be addressed.

E-mail: haber@helix.mgh.harvard.edu (D.A.H.); maheswaran@helix.mgh.harvard.edu (S.M.)

Published 1 February 2013, *Science* **339**, 580 (2013)  
DOI: 10.1126/science.1228522

This PDF file includes:

Materials and Methods  
Figs. S1 to S7  
Tables S1 to S7  
References

**Other Supplementary Material for this manuscript includes the following:**  
(available at [www.sciencemag.org/cgi/content/full/339/6119/580/DC1](http://www.sciencemag.org/cgi/content/full/339/6119/580/DC1))

Movie S1

## **Material and Methods**

### **<sup>Hb</sup>CTC-Chip Production and Blood Processing**

<sup>Hb</sup>CTC-Chips were manufactured on site at the MGH Cancer Center/ BioMEMS Resource Facility, and chips were functionalized using biotinylated antibodies as previously described (10). Chips functionalized with 50 µg of NeutrAvidin were coated with a cocktail of 10 µg/ml each of biotinylated antibodies against EpCAM, HER2, and EGFR. Antibodies were purchased from the following vendors: EpCAM (R&D Systems BAF960); HER2 (R&D Systems BAF1129); EGFR (Cetuximab, Lilly, biotinylated in-house); and control goat IgG antibody (R&D Systems BAF108).

Blood specimens for CTC analysis were obtained after informed patient consent, per IRB protocol (05-300), at the Massachusetts General Hospital (MGH). A maximum of 20 mL of blood was obtained at any given blood draw in EDTA vacutainers, and approximately 3 mL of blood was processed through the <sup>Hb</sup>CTC-Chip within 4 hours of blood draw, at a target flow rate of 1.5 mL/hr as previously described (10).

### **CTC staining and enumeration**

Following blood processing, captured cells on the <sup>Hb</sup>CTC-Chip were fixed with 4% paraformaldehyde and washed with PBS. Fixed cells were then permeabilized with 1% NP40 in PBS, blocked with 3% goat serum/2% BSA, and immunostained with relevant

primary antibodies. Primary antibodies for CTC analyses were rabbit wide spectrum anti-cytokeratin (1:100, Abcam ab9377), mouse IgG2a anti-CD45 (1:500, Abcam ab30470), and mouse IgG1 anti-CD61 (1:100, Abcam ab11027). Secondary immunofluorescence-tagged antibodies were used for signal amplification. The secondary antibodies were goat anti-rabbit Alexa Fluor 647 (1:500, Invitrogen A-21245), goat anti-mouse IgG2a Alexa Fluor 488 (1:500, Invitrogen A-21131), and goat anti-mouse IgG1 Alexa Fluor 488 (1:500, Invitrogen A-21121). Nuclei were then stained with DAPI and the devices were washed with PBS and stored at 4°C. The devices were imaged under 10x and followed by 40x magnification using the BioView Ltd. automated imaging system (Billerica, MA) as well as an automated upright fluorescence microscope (Eclipse 90i, Nikon, Melville, NY). Positive staining for CK, without CD45 staining, was required for scoring potential CTCs, which were then manually reviewed. Threshold and baseline signals were established using specimens from healthy human controls.

### **QuantiGene ViewRNA *in-situ* hybridization on <sup>Hb</sup>CTC-Chip**

Following blood processing, <sup>Hb</sup>CTC-Chips were fixed with 4% paraformaldehyde, washed with PBS and dehydrated with ethanol at increasing concentrations (50%, 70%, and 100%). <sup>Hb</sup>CTC-Chips were submerged in 100% ethanol at -20° C for storage. Before further analysis, cells were rehydrated using decreasing concentrations of ethanol (70% and 50%) and washed with PBS. ISH was performed using QuantiGene ViewRNA (Affymetrix, Santa Clara, CA) protocols as previously described (17). Briefly, <sup>Hb</sup>CTC-Chips were permeabilized with Working Detergent Solution, and digested with Protease

at 1:2000 dilution in PBS. The <sup>Hb</sup>CTC-Chips were hybridized for 3 hours at 40° C with a cocktail of custom-designed QuantiGene ViewRNA probes against epithelial (CDH1, EpCAM, KRT5, KRT7, KRT8, KRT18, KRT19; type 10 probes) and mesenchymal markers (FN1, CDH2, SERPINE1; type 6 probes) and FOXC1 (type 1 probe). Unbound probes were flushed out with Wash Buffer and <sup>Hb</sup>CTC-Chips were stored overnight at 4° C in Storage Buffer. The bound probes were amplified the following day through PreAmp hybridization for 1 hour at 40° C, followed by Amp hybridization for 1 hour at 40° C. Label Probes (LP) targeting the epithelial (LP10-cy3), mesenchymal (LP6-cy5), or FOXC1 (LP1-cy3) probe types were added for 1 hour at 40° C. <sup>Hb</sup>CTC-Chips were stained with DAPI, washed with PBS and stored at 4°C. The devices were imaged under 10x using the BioView Ltd. automated imaging system (Billerica, MA). Candidate targets were followed by 40x magnification imaging in 25 z-steps per 1 µm using BioView. Positive signals presenting as punctate speckles were quantified in each channel and cells with more than 5 speckles were considered positive. Candidate targets were manually reviewed and those with bi-lobe and multi-lobe nuclear morphology and high fluorescent diffused background were excluded from final count (leukocytes tend to have such highly fluorescent diffused background based on HD testing). Selected targets were also imaged in an automated upright fluorescence microscope (Eclipse 90i, Nikon, Melville, NY). Threshold and baseline signals were established using healthy human controls.

### **QuantiGene ViewRNA *in-situ* hybridization on FFPE tissue**

Breast cancer TMA was purchased from US Biomax (BR1503a). Human breast cancer FFPE specimens were processed for RNA-ISH as previously described (17). Briefly, 5-micron sections were fixed in 10% formaldehyde (Fisher Scientific, Pittsburgh, PA), deparaffinized, boiled in pre-treatment solution (Affymetrix, Santa Clara, CA) and digested with proteinase K. Sections were hybridized for 3 hours at 40° with a cocktail of custom designed QuantiGene ViewRNA probes against epithelial (CDH1, EpCAM, KRT5, KRT7, KRT8, KRT18, KRT19; type 1 probes) and mesenchymal markers (FN1, CDH2, SERPINE1; type 6 probes), HER2, FOXC1 and TFF1 (type 1 probes) (Affymetrix, Santa Clara, CA). Bound probes were then amplified per protocol from Affymetrix using PreAmp and Amp molecules. Multiple Label Probe oligonucleotides conjugated to alkaline phosphatase (LP-AP Type 1) were then added and Fast Red Substrate was used to produce signal (red dots). For two color assays, an LP-AP type 6 probe was used with Fast Blue substrate (blue dots) followed by LP-AP type 1 probe with Fast Red Substrate (red dots) to produce a dual colorimetric signals. Slides were then counterstained with Hematoxylin. Images were taken by Aperio scanscope, a Nikon 90i scope, and an Olympus scope with color camera.

### **RNA isolation from the <sup>Hb</sup>CTC-Chip**

RNA from CTC-enriched cell populations was isolated from the devices using a modified Qiagen RNeasy MinElute kit (Qiagen) protocol. Briefly, 350 µl of the RLT buffer with 2-mercaptoethanol was pipetted into the <sup>Hb</sup>CTC-Chip with mixing between the inlet and outlet of the device. The resulting RLT lysate was loaded onto Qiagen RNeasy MinElute

column, RNA was purified per protocol and eluted in a total of ~ 10  $\mu$ L RNase free water.

### **Single Molecule Sequencing**

Purified RNA was subjected to Digital Gene Expression (DGE) sample prepping and analyzed on the HeliScope<sup>TM</sup> Single Molecule Sequencer from Helicos BioSciences. For CTC samples, application of a low quantity RNA-seq method was utilized as previously described (16). Briefly, the purified RNA was converted to first-strand cDNA with the SuperScript III first-strand cDNA synthesis kit (Invitrogen) using random hexamers according to manufacturer's recommendation. RNA was digested and single stranded cDNA was purified using a combination of QIAquick nucleotide removal kit (Invitrogen) and ethanol precipitated with ammonium acetate and glycogen. Single stranded cDNA was denatured and then a poly-A tail was added to the 3' end using terminal transferase (New England Biolabs). Tailed cDNAs were hybridized to the sequencing flow cell followed by "Fill and Lock" and subjected to single molecule sequencing by synthesis.

### **DGE analysis**

Helicos single molecule sequencing and digital gene expression (DGE) profiling was performed as previously described (16). In order to find differential transcript expression we first normalized the DGE profile by linearly transforming to transcripts per million (tpm), discarding transcripts for which the 95<sup>th</sup> percentile of tpm was less than 10 and

then dividing the tpm values for each transcript by the 95<sup>th</sup> percentile of the tpm values for that transcript. We then subtracted the thus normalized expression values from each IgG chip from those from the corresponding CTC chip, forming what we call “controlled expression values.” To find transcripts consistently expressed higher in class A than class B, for each transcript we computed a statistic defined as the 5<sup>th</sup> percentile of the controlled expression values from class A minus the 95<sup>th</sup> percentile of the controlled expression values from class B. We then computed FDR estimates by comparing the actual statistics to those obtained by permuting class labels as was done in SAM (30). We called transcripts with FDR estimate less than 15% significantly over-expressed. To help interpret each list of significantly over-expressed transcripts, we used hypergeometric tests to look for significant overlap with the gene sets in the MSigDBv3.0 collection (31) augmented by gene lists from three studies (32-34). We used the method of Benjamini and Hochberg (35) to convert the hypergeometric p-values to FDR estimates and considered a gene set enriched if its FDR estimate was below 25%. The enriched gene signatures were manually annotated for their functional categories (group, subgroup, and specifics in Table S3 and S5) and the top repetitively occurred ones were summarized in Figure 4.

### **Mouse Xenograft Tumor Assays**

The animal protocol was approved by the MGH Subcommittee on Research Animal Care. Six-week old female NSG (NOD.Cg-Prkdcscid Il2rgtm1Wjl/SzJ) mice (Jackson Laboratory) were anesthetized with isofluorane,  $5 \times 10^6$  BT474 cells and  $2 \times 10^6$  MDA-

MB-231 cells in 100ul of 1:1 PBS and Matrigel (BD) were injected into the 4<sup>th</sup> right mammary fat pad. A 90 day release 0.72mg estrogen pellet (Innovative Research of America) was implanted subcutaneously behind the neck of the mice injected with BT474. Primary tumors were sampled after 6-8 weeks.

### **cDNA Expression Constructs and Viral Infection**

The *LBX1* open reading frame fused with ER (G525R mutation) was cloned into pBabe vector. Vesicular stomatitis virus glycoprotein-pseudotyped retroviruses were generated using the packaging cell line HEK293T as previously described (11). MCF-10A cells were infected with pBabe-LBX1-ER virus followed by 2 µg/ml puromycin selection for 3 days.

### **Flow Cytometry Analysis**

Cells were collected using Accutase (eBioscience) and washed in PBS. Cells ( $5 \times 10^5$ ) were blocked with blocking buffer (PBS + 2% FBS + 1% BSA) on ice for 10 mins, incubated with 0.5 ug of goat anti-human EpCAM antibody (R&D Systems) and corresponding isotype control antibodies (Santa Cruz) for 30 mins on ice, then washed with blocking buffer. After incubation with donkey anti-goat secondary antibody conjugated with Alexa-488 at 1:1000 dilution for 30 mins on ice, cells were washed with blocking buffer, and EpCAM level was analyzed using a FACSCalibur flow cytometer (BD Biosciences).



### **Antibodies and Immunoblot Analysis**

Antibodies used were EpCAM (R&D), EGFR (Cell Signaling), HER2 (Cell Signaling), and  $\beta$ -tubulin (Santa Cruz). Cells were lysed in RIPA buffer [20mM Tris, pH8/150mM NaCl/10mM NaF/0.1% SDS/1% Nonidet P-40/1x protease inhibitor mixture (Roche)]. Lysates were run on SDS/4-15% polyacrylamide gel (Bio-Rad) and transferred onto PVDF membranes (Invitrogen), and immunoblots were visualized with Western Lightning Plus chemiluminescence kit (PerkinElmer).

### **Real-time qRT-PCR**

Total RNA (300 ng) was reverse transcribed using SuperscriptIII kit (Invitrogen). Real-time quantitative RT-PCR was performed using SYBR green in an ABI PRISM 7500 sequence detection system with 96-block module and automation accessory (Applied Biosystems). GAPDH was used as internal control. The primers used are shown below:

GAPDH: GGTCTCCTCTGACTTCAACA; GTGAGGGTCTCTCTCTTCCT.

CDH1: CACGGTAACCGATCAGAATG ; ACCTCCATCACAGAGGTTCC.

EpCAM: CTGCCAAATGTTTGGTGATG ; AGCCCATCATTGTTCTGGAG .

KRT5: CAAGCGTACCACTGCTGAGA ; CATCCATCAGTGCATCAACC.

KRT7: CAGGATGTGGTGGAGGACTT ; TTGCTCATGTAGGCAGCATC.

KRT8: TGGAGCAGCAGAACAAGATG ; CCGCCTAAGGTTGTTGATGT.

KRT18: CACAGTCTGCTGAGGTTGGA ; CAAGCTGGCCTTCAGATTTC.

KRT19: TGAGCAGGTCCGAGGTTACT ; TCTTCCAAGGCAGCTTTCAT.

FN1: GAAGCCGAGGTTTTAACTGC ; ACCCACTCGGTAAGTGTTC.

CDH2: AGAAAACCTCCAGGGGACCTT ; ATACCAGTTGGAGGCTGGTC.

SERPINE1: TGGCTCAGACCAACAAGTTC ; GTAGGGCAGTTCCAGGATGT.

### **Clinical Response Analysis**

The definition for clinical response or progression was made on clinical, serological, and/or radiological criteria, as routinely used in clinic for clinical decision making. The clinician was blinded to the CTC results.

**Fig. S1.** Validation of E and M markers in BT474 and MDA-MB-231 breast tumor xenografts grown in mice.

(A) Relative expression levels of E and M markers in highly epithelial, luminal-type BT474 and the highly mesenchymal triple negative (ER-, PR-, HER2-) MDA-MB-231 breast cancer cells measured by qRT-PCR (mean  $\pm$  s.d., n=3). (B) RNA-ISH analysis of E (red dots) and M (dark blue dots) markers in mammary tumors derived from BT474 and MDA-MB-231 cells injected orthotopically in NSG mice. Scale bar = 20  $\mu$ m.

**Fig. S2. Capture efficiency of breast cancer cell lines on <sup>Hb</sup>CTC-Chips functionalized with antibodies against EpCAM, HER2 and EGFR.**

(A) Western blot analysis of EGFR, EpCAM and HER2 expression in breast cancer cell lines MCF7 (ER+/PR+), SKBR3 and BT474 (HER2+), and MCF10A, MDA-MB-231, BT549, HCC1937, and HS578T (ER/PR/HER2 triple negative). (B) Capture efficiency of three different breast cancer cell lines (MCF7, SKBR3, and MDA-MB-231) spiked into healthy donor blood and isolated using a <sup>Hb</sup>CTC-Chip coated with antibodies against EpCAM, HER2, and EGFR used either individually or as a triple cocktail. Coating the <sup>Hb</sup>CTC-Chip with all three antibodies resulted in equivalent capture (>80%) of fluorescent-tagged MCF7 (epithelial ER+/PR+), SKBR3 (HER2+), and MDA-MB-231 cells (mesenchymal, triple negative) spiked into healthy donor blood, whereas none of the individual antibodies efficiently captured all three cell types.

**Fig. S3. Induction of EMT in breast epithelial MCF-10A cells using the master transcriptional regulator LBX1 (*l1*) induces E to M state transition within 72 hours.**

(A) Phase contrast image of MCF-10A/LBX1-ER cells, untreated (control) and treated with 4-hydroxytamoxifen (4-OHT) (LBX1 induced) for 72 hours. Scale bar = 10  $\mu$ m. (B) Immunofluorescent staining of LBX1 (green) in parental and induced cells. Nuclei were stained with DAPI (blue). Scale bar = 20  $\mu$ m. (C) Flow cytometry analysis of surface EpCAM expression level in parental (red) and LBX1-induced (blue) cells demonstrating downregulation of surface EpCAM in LBX1 induced cells. Isotype control is shown in green. (D) RNA-ISH staining for E (yellow dots) and M (red dots) markers in parental MCF-10A cells and in cells that have undergone EMT by induced expression of the master regulator LBX1, following capture on the <sup>Hb</sup>CTC-Chip. Nuclei are stained with DAPI (blue). Scale bar = 10  $\mu$ m. (E) Quantification of EMT features in parental and LBX1-induced cells based on dot counts of E and M markers. The RNA-ISH technology (Panomics, Affymetrix Inc.,) offers the flexibility of custom designed and validated probes against multiple genes that are pooled within a single fluorescent spectral channel, as well as the ease of multiplexing with different fluors with a highly reproducible quantitative signal for each fluor, thus enabling not only dual staining, but also precise quantitation of a continuous spectrum from epithelial to mesenchymal states (E, E>M, E=M, M>E, and M) within each CTC analyzed. Compared to traditional protein-based immunofluorescence staining, this RNA-based method provides dramatically improved signal to noise ratio, linearity of signal, and absence of false positive (dual) staining (which is common in CTC analyses using antibody staining). The RNA-ISH signal appears as specific fluorescent speckles or dots, whereas any background signal is diffuse

and clearly distinct. We used automated microscopic scanning (Bioview and Nikon platforms) to scan the target in 25 z steps (1 $\mu$ m distance in each step) to ensure reproducibility of quantitation.

**Fig. S4. Longitudinal monitoring of EMT features in CTCs from an index patient.**

Plot of CTC counts based on protein (CK, dotted line) and RNA (E and M markers, solid line) detection methods in a patient sampled on different days during the course of treatment. Color-coded quantitation of single CTCs (S-CTC) or clustered CTCs (C-CTC) based on RNA-ISH staining at various time points is shown above each time point. Treatment history and clinical responses are shown in the chart (P=Disease progression; R=Treatment response).

**Fig. S5. M+ clusters of CTCs from two ER/PR+ patients.**

(A) Representative images of M+ clusters from patient #1 stained for E (green) and M (red) markers by RNA-ISH. Different planes of focus for clusters 2 and 3 are shown. Nuclei were stained with DAPI (blue). Scale bar = 10  $\mu$ m. (B) Examples of M+ clusters in patient #7. Scale bar = 10  $\mu$ m.

**Fig. S6. Expression of TFF1 (red dots) in primary tumor and lymph nodes.**

Primary tumor and metastatic lymph node of patient #1 were analyzed for TFF1

expression by RNA-ISH. Nuclei were stained with hematoxylin (blue). Scale bar = 20  $\mu\text{m}$ .

**Fig. S7. FOXC1 expression in breast tumor samples.**

(A) Tumor sections of xenografted mammary tumors generated by BT474 (negative control, left image) and MDA-MB-231 (MDA-231, positive control, middle image) cells were stained for FOXC1 (red dots). FOXC1 staining in a tumor sample from a triple negative patient is shown (right image). Scale bar = 20  $\mu\text{m}$ . (B) Images of FOXC1 (red dots, arrow) expression in the primary tumor (left) and metastatic lymph node (middle), and FOXC1 (green dots, arrow) and M markers (red dots, arrow head) in the CTCs (right) from patient #1 as visualized by RNA-ISH. (Nuclei are stained with hematoxylin, light blue or DAPI, blue). Scale bar (left two images) = 20  $\mu\text{m}$ ; scale bar (right image) = 10  $\mu\text{m}$ . (C) Images of FOXC1 (red dots, arrow) expression in primary tumor and metastatic lymph node from patient #7 analyzed by RNA-ISH. (Nuclei are stained with hematoxylin, light blue). Bottom panel: Expression of FOXC1 at the invasive edge of the tumor from patient #7. Scale bar = 20  $\mu\text{m}$ .

**Table S1. Expression levels of E/M, CD45, and receptor markers in WBC and SKBR3 cells analyzed by RNA sequencing.**

**Table S2: SNaPshot tumor genotyping analysis of patients shown in figure 2c.**

**Table S3. The list of 45 genes expressed in E+ CTCs at all five time points.**

**Table S4. The list of GSEA gene signatures enriched in the 45 genes from Table S3.**

The list was manually annotated for different categories as group, subgroup, and specifics.

**Table S5. The list of 170 genes expressed in M+ clusters.**

**Table S6. The list of GSEA gene signatures enriched in the 170 genes from Table S5.**

The list was manually annotated for different categories as group, subgroup, and specifics.

**Table S7. The list of genes that demonstrate overlap between the 170 cluster genes and the core EMT signature (18).**

**Movie S1.** The movie of different z-plane images of a cluster of CTCs (from patient #1), which stained positive for M markers (red) and weakly positive for E markers (green) at time point 8. Fluorescent images were merged with DIC images. Nuclei were stained with DAPI (blue).

## References:

30. V. G. Tusher, R. Tibshirani, G. Chu, *Proc Natl Acad Sci U S A* **98**, 5116 (2001).
31. A. Subramanian *et al.*, *Proc Natl Acad Sci U S A* **102**, 15545 (2005).
32. Y. Kang *et al.*, *Cancer Cell* **3**, 537 (2003).
33. A. J. Minn *et al.*, *Nature* **436**, 518 (2005).
34. P. D. Bos *et al.*, *Nature* **459**, 1005 (2009).
35. Y. Benjamini, Y. Hochberg, *Journal of the Royal Statistical Society* **57**, 289 (1995).
36. D. Dias-Santagata *et al.*, *EMBO Mol Med* **2**, 146 (2010).



Fig. S1

A

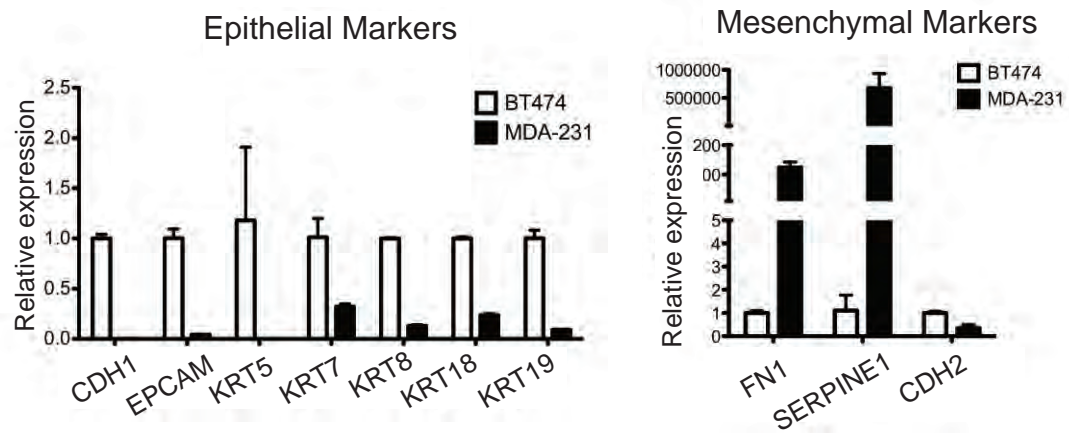

B

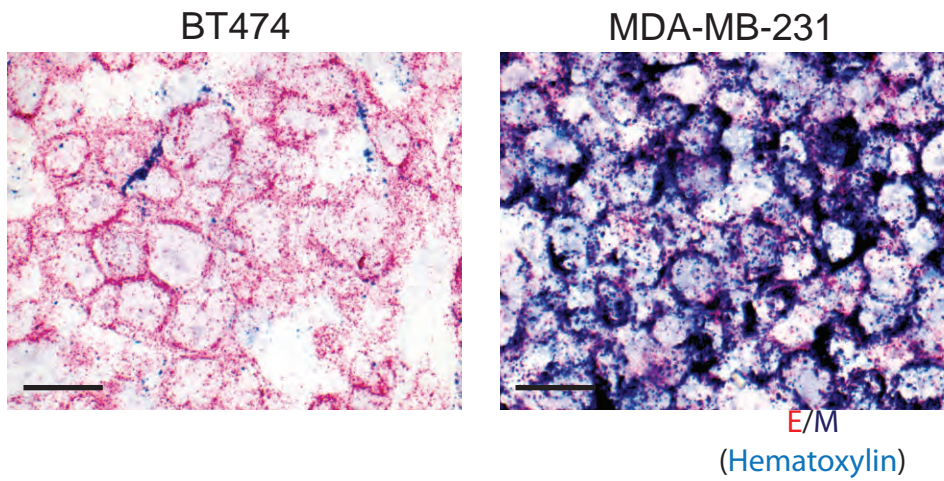

Fig. S2

A

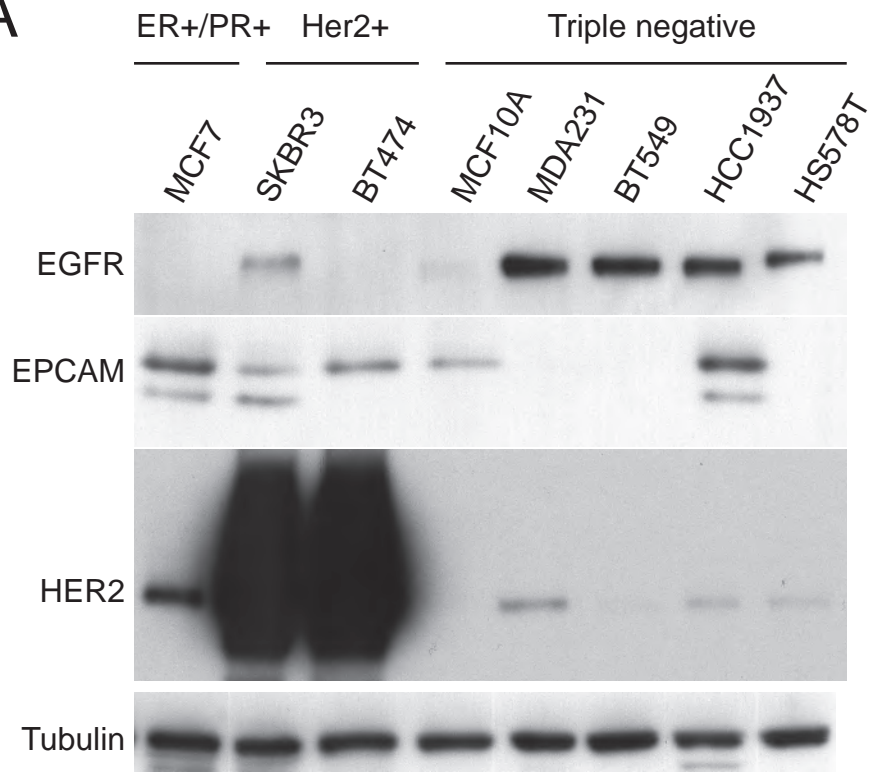

B

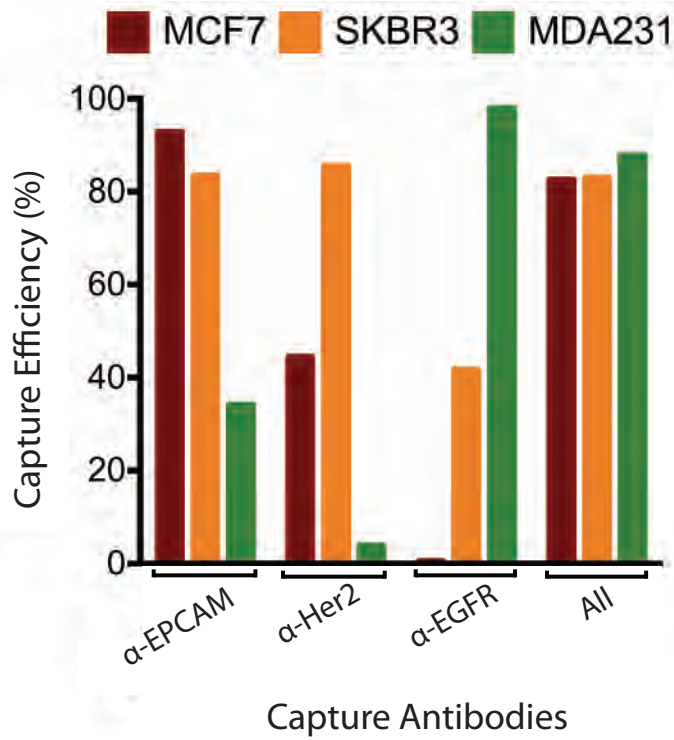

Fig. S3

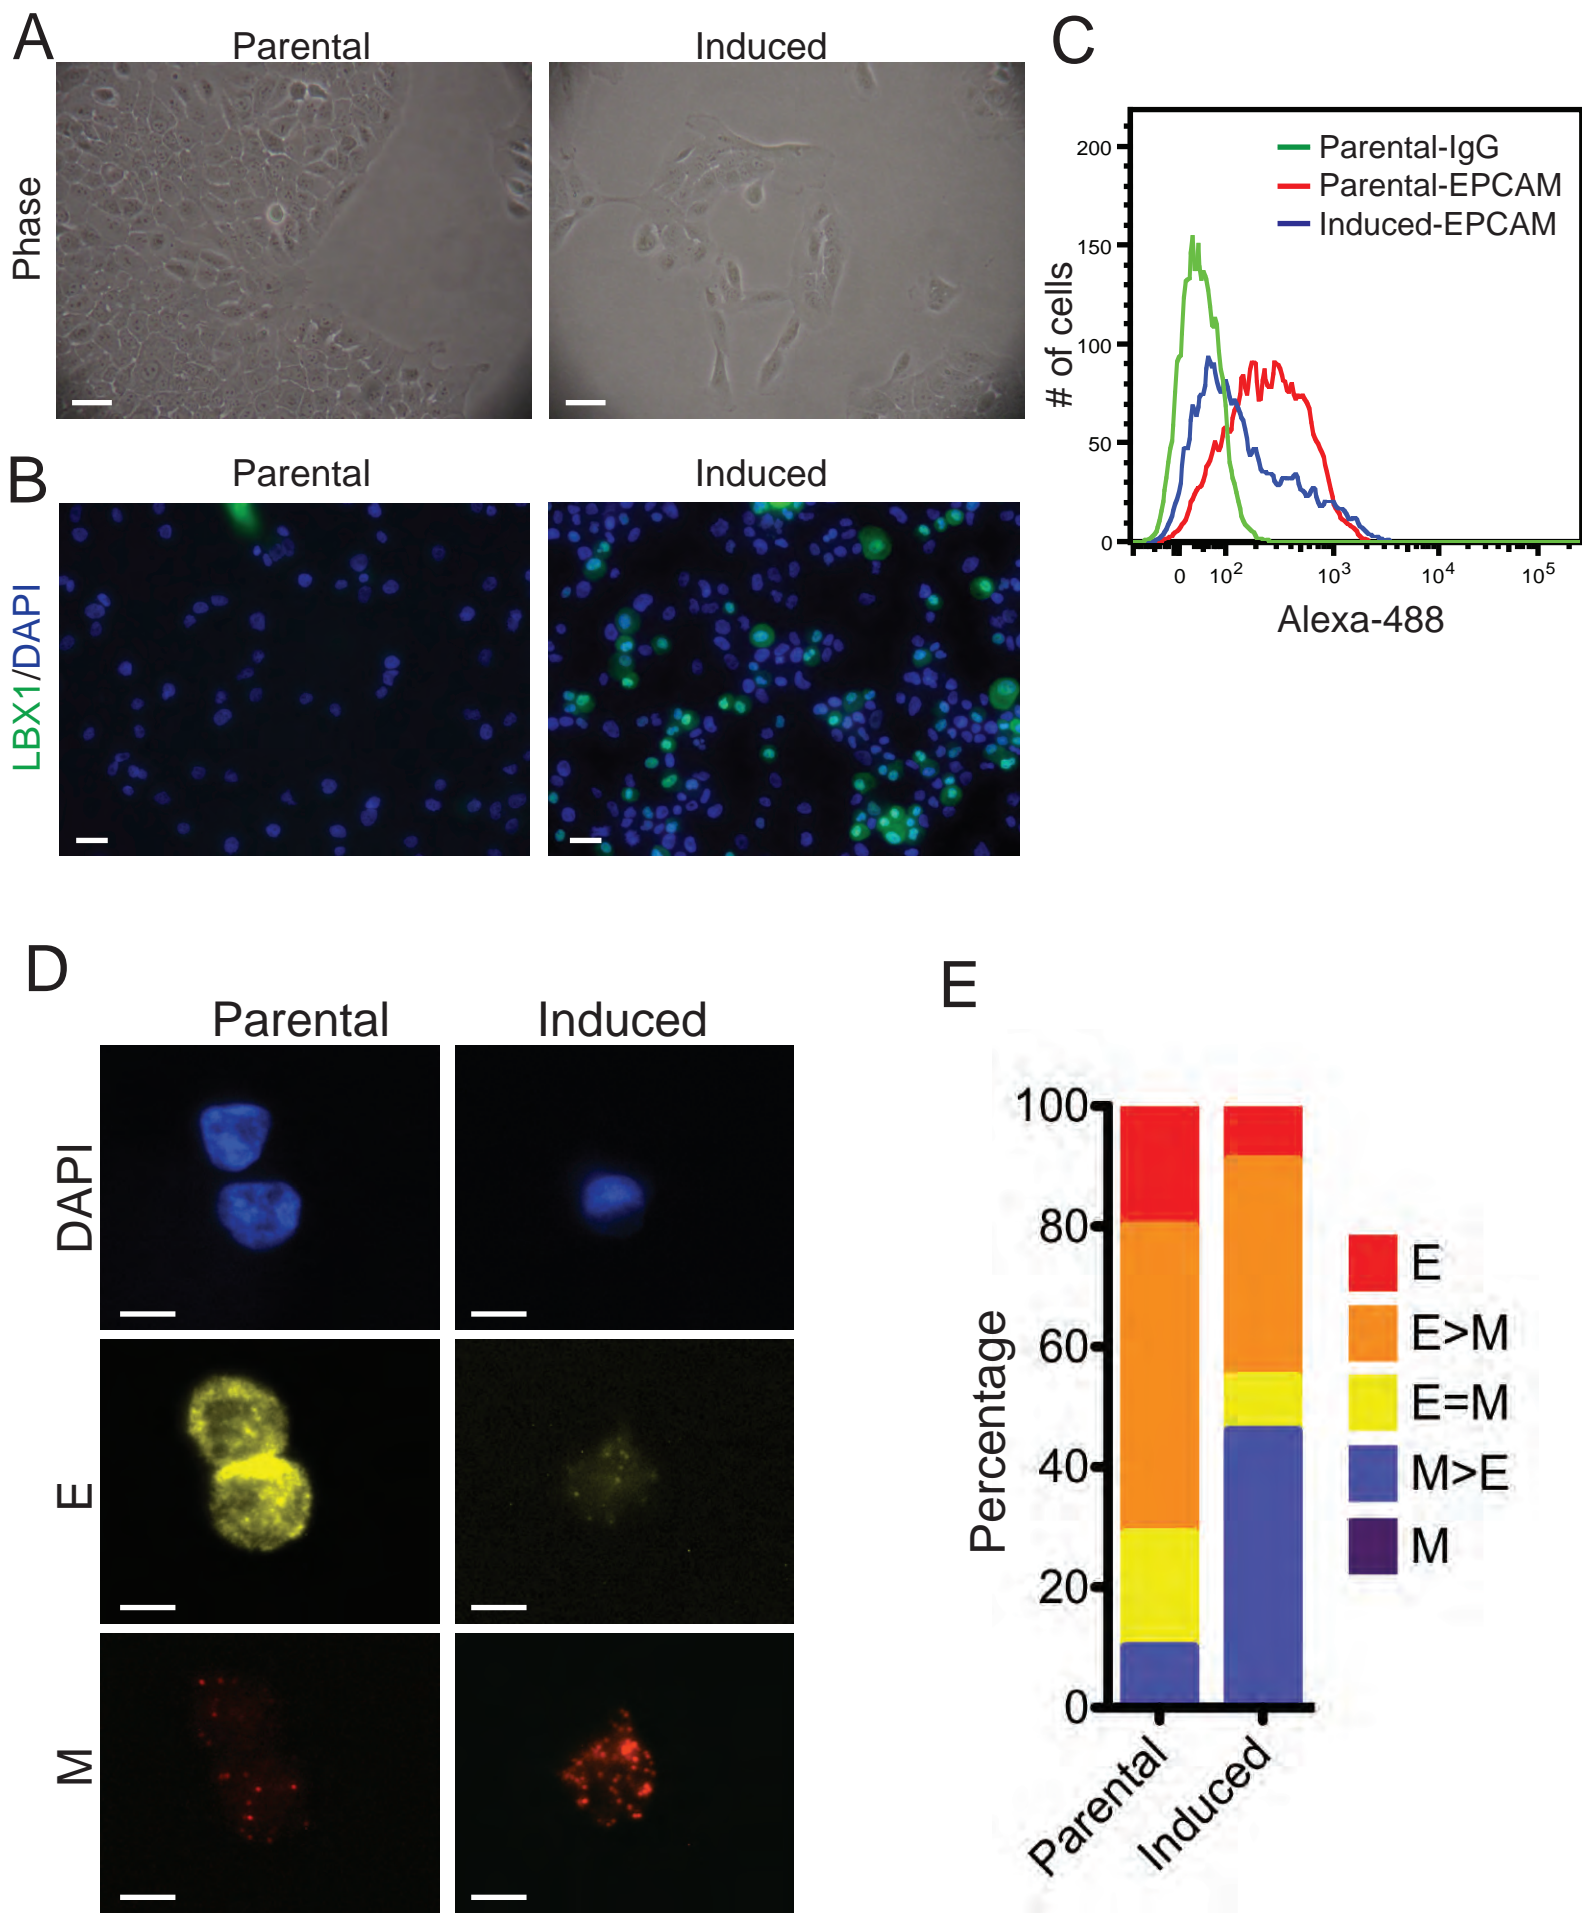

Fig. S4

(P) Disease progression      ● S-CTC  
(R) Treatment response      ● C-CTC

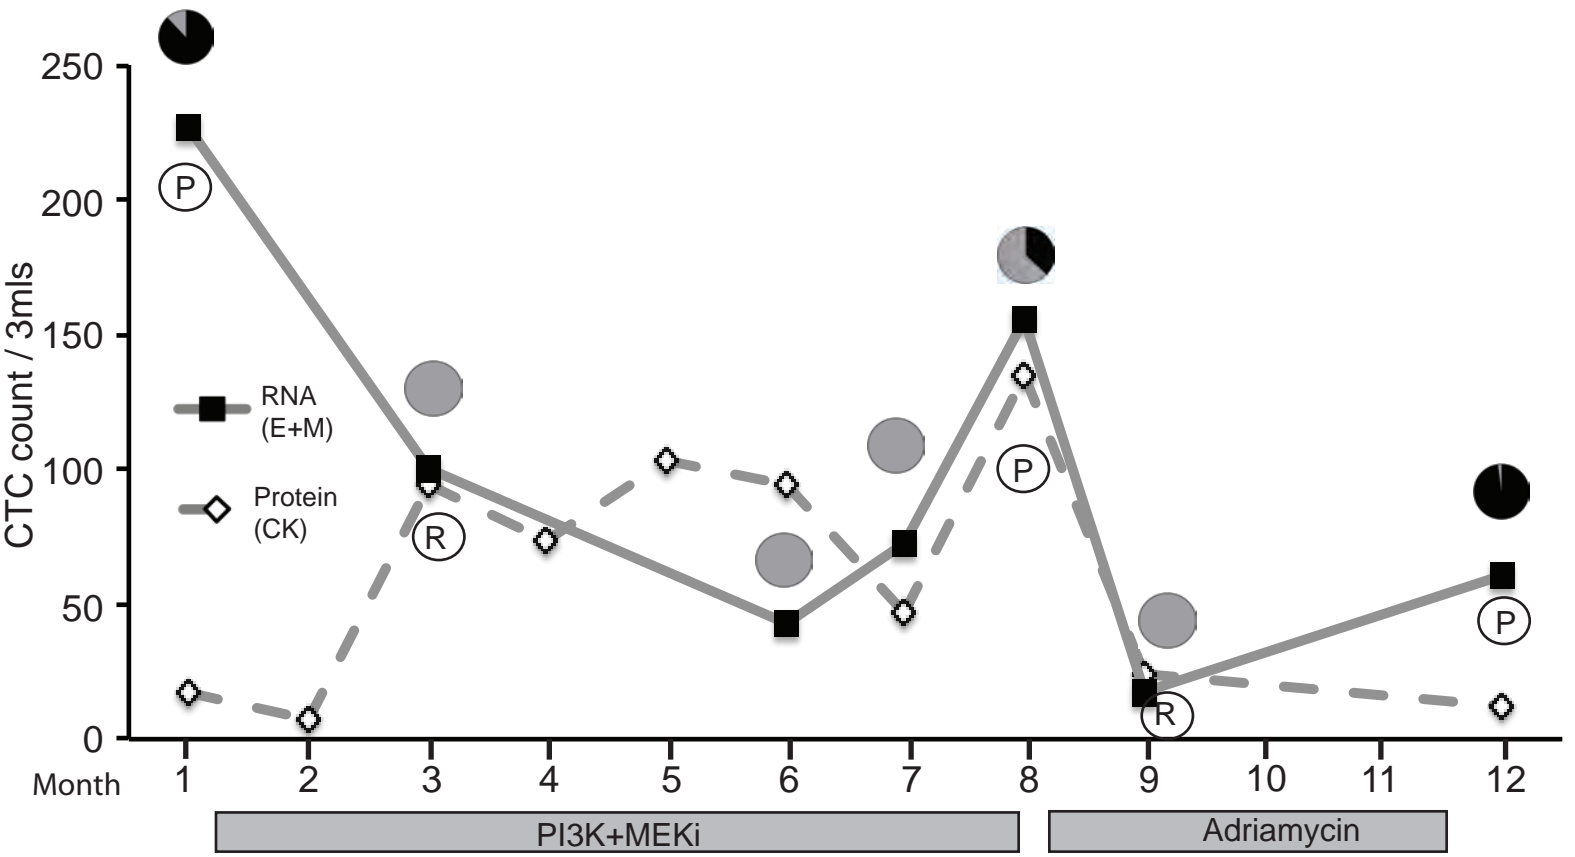



Fig. S5

A Patient 1 Cluster 1

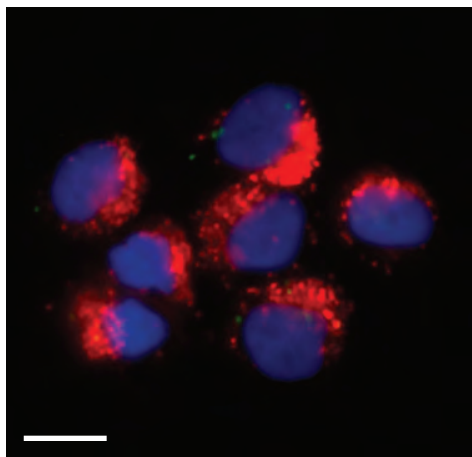

Cluster 2

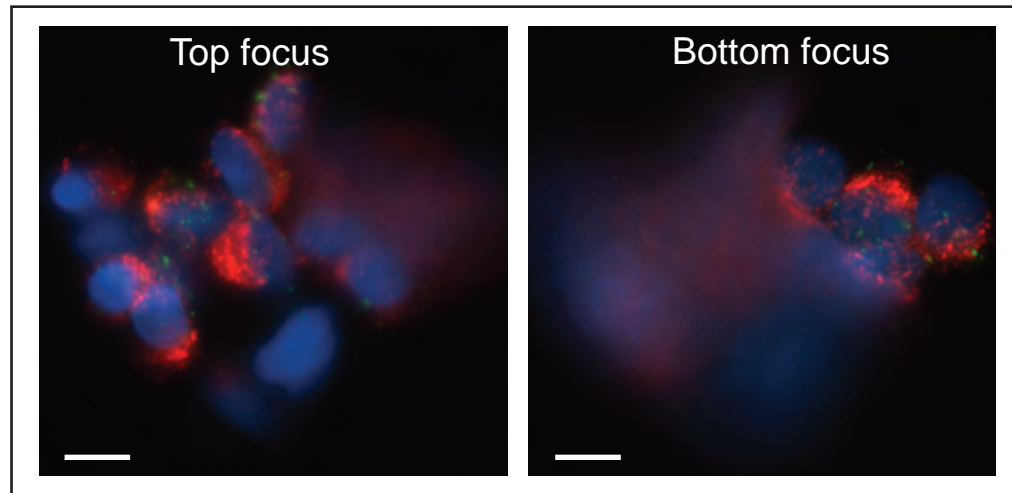

Cluster 3

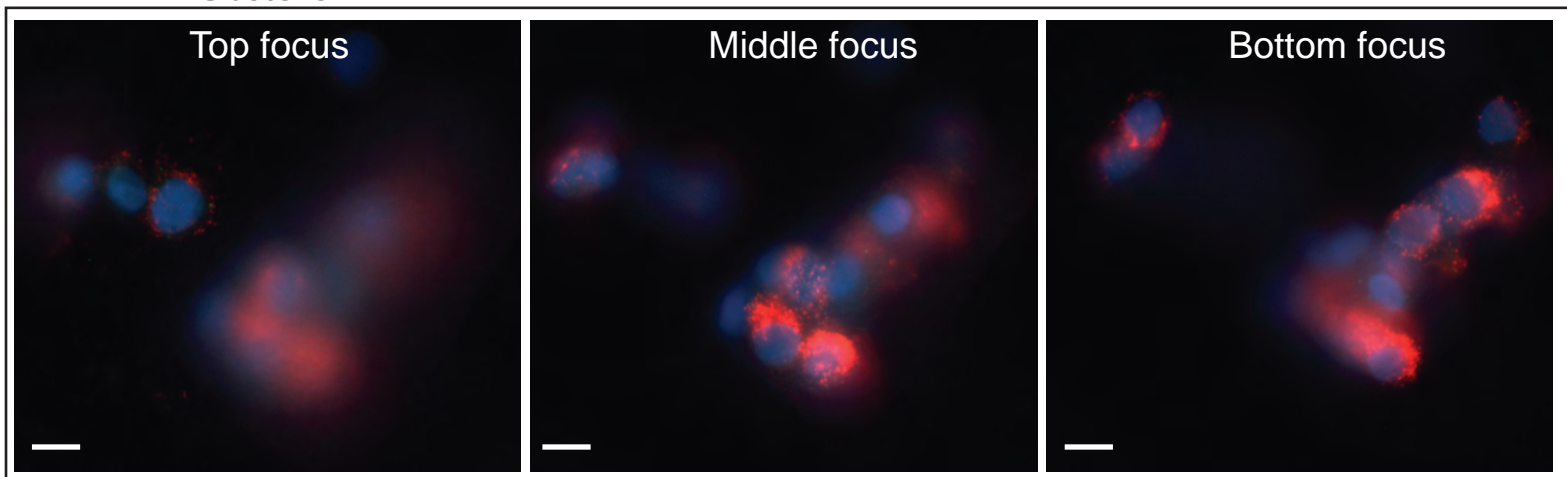

B Patient 7 Cluster 1

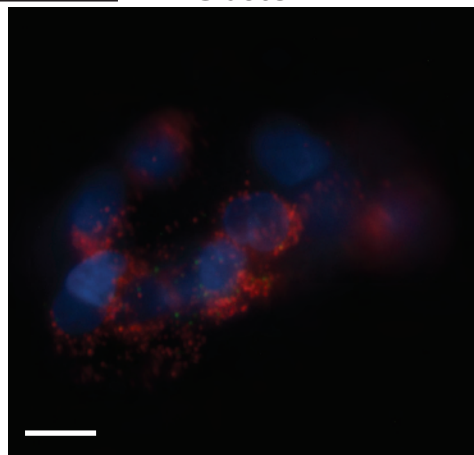

Cluster 2

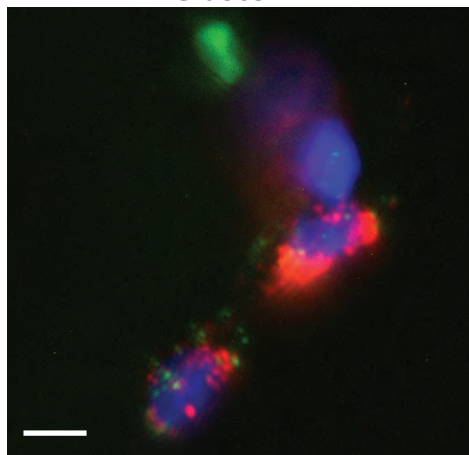

Cluster 3 E/M/DAPI

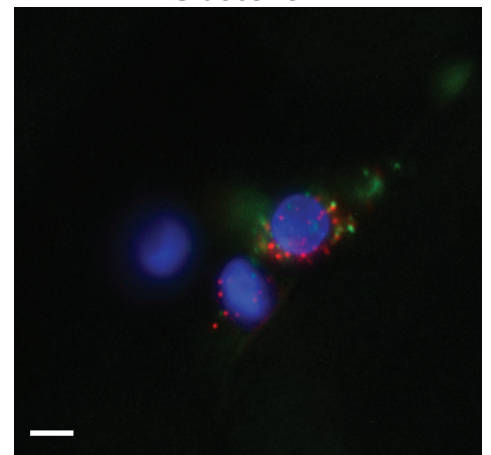

Cluster 4

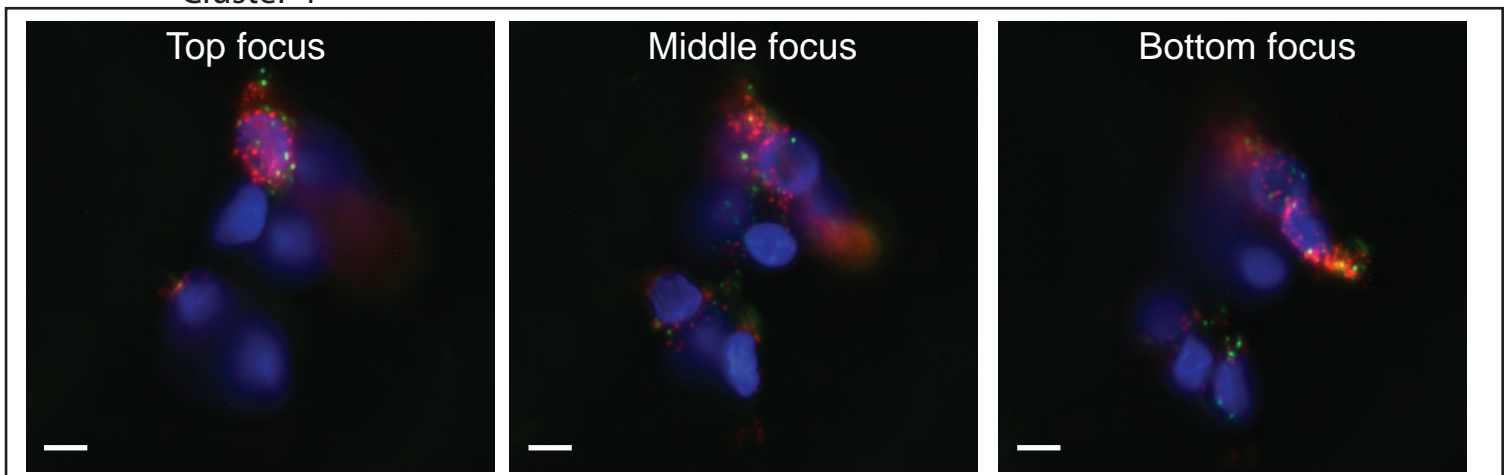

# Fig. S6

Patient 1

Tumor

Lymph node

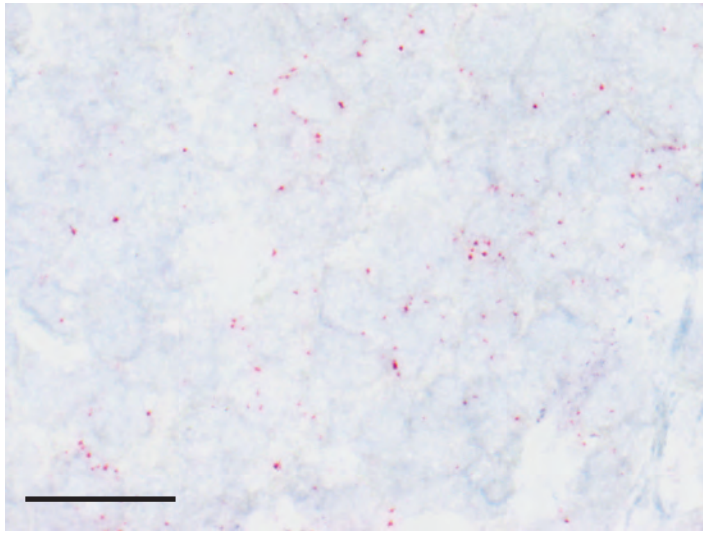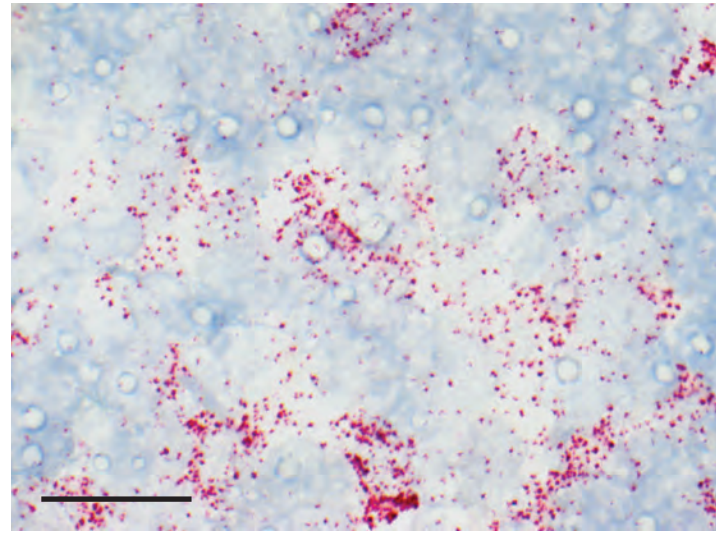

TFF1/Hematoxylin



Fig. S7

A

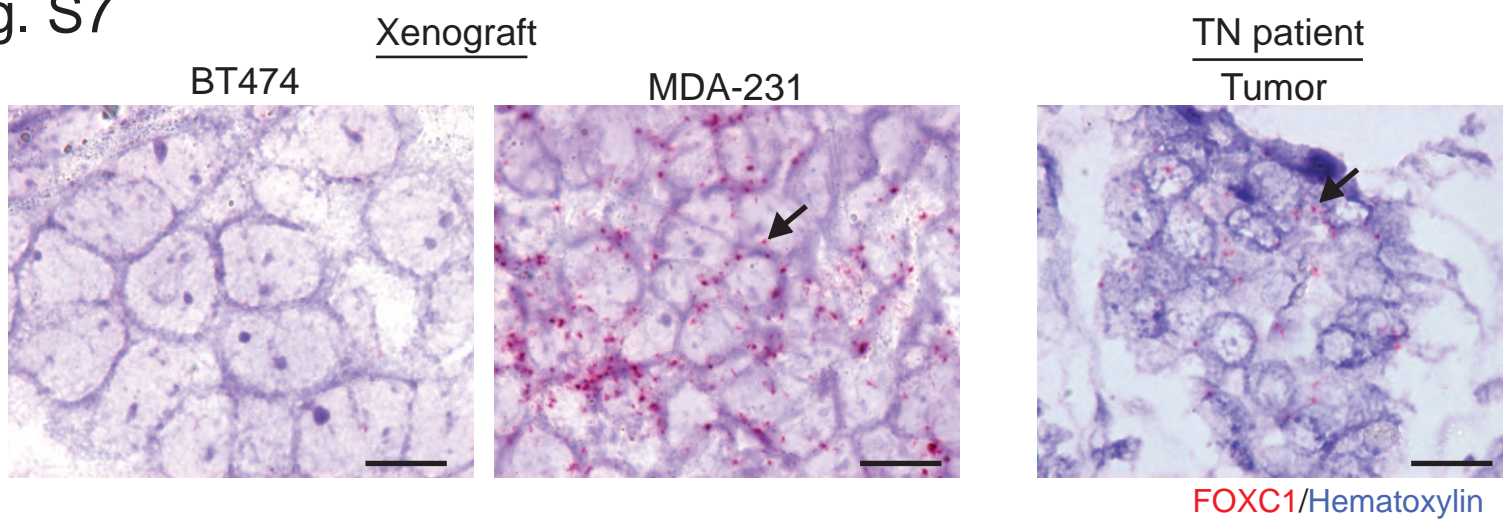

B

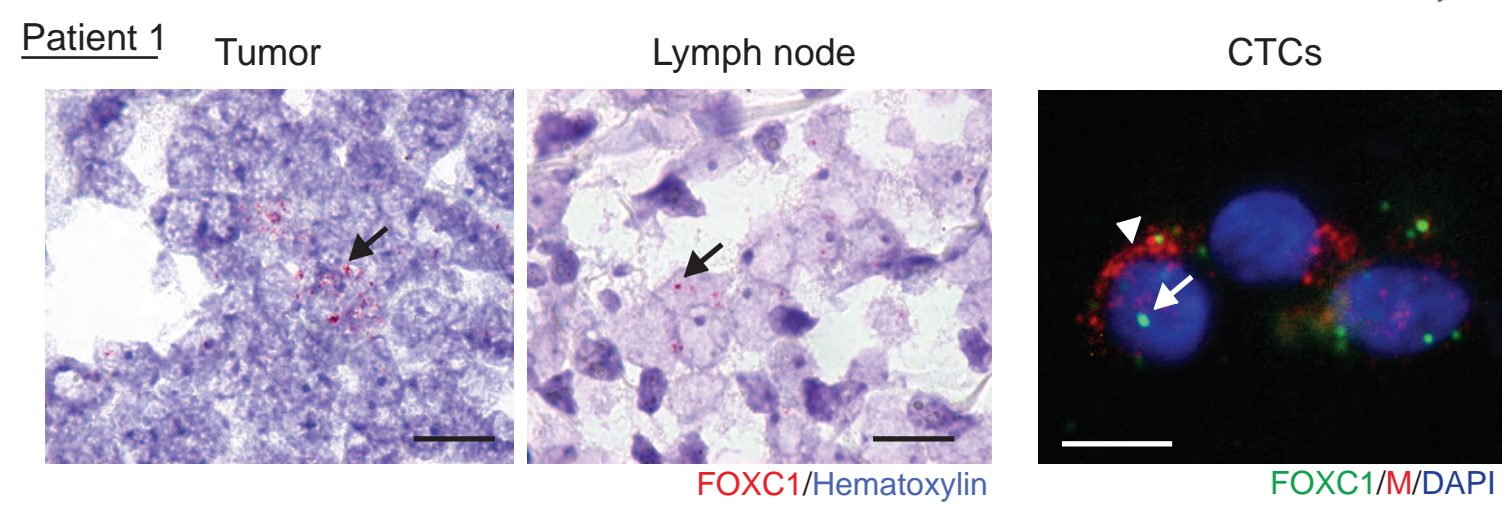

C

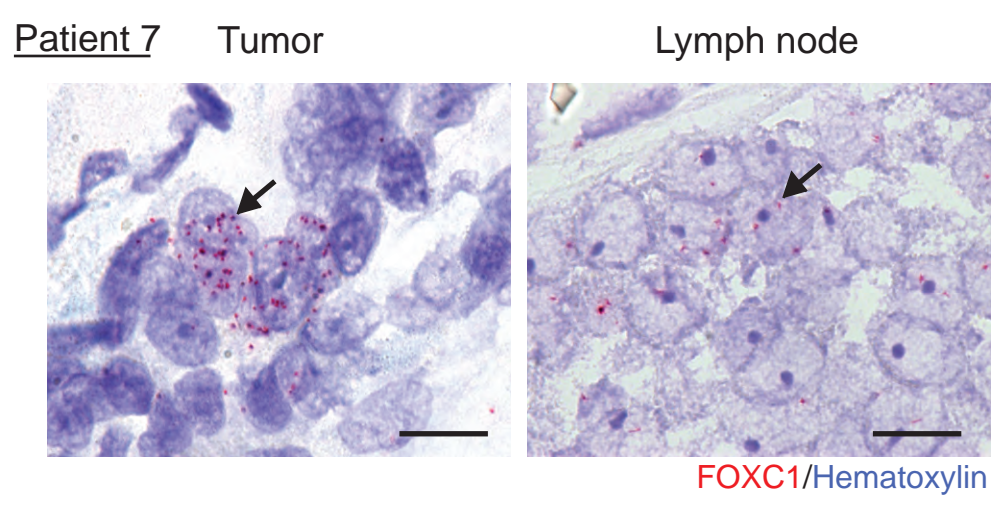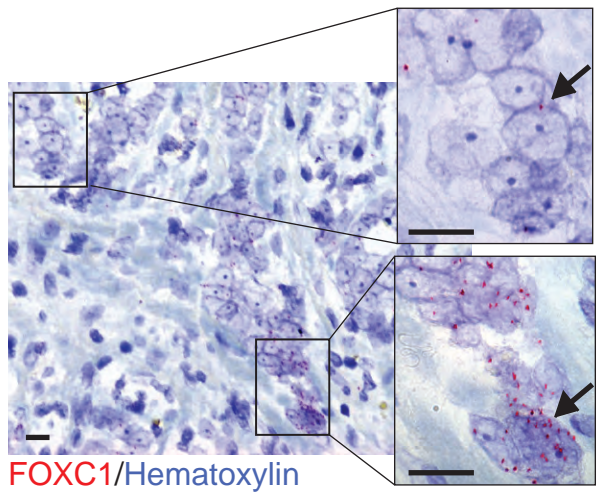

**Table S1. Expression level of different genes in a female healthy donor white blood cells (WBC) and SKBR3 cells by Helicos RNA sequencing**

|                               | WBC (tpm) | SKBR3 (tpm) |
|-------------------------------|-----------|-------------|
| <b>WBC marker</b>             |           |             |
| CD45                          | 1036      | 0           |
| <b>Mammary origin markers</b> |           |             |
| ERBB2                         | 0         | 2383        |
| ESR1                          | 1         | 0           |
| PGR                           | 1         | 0           |
| EGFR                          | 0         | 27          |
| <b>Epithelial markers</b>     |           |             |
| CDH1                          | 0         | 3           |
| EPCAM                         | 0         | 187         |
| KRT5                          | 0         | 0           |
| KRT7                          | 0         | 1811        |
| KRT8                          | 2         | 2918        |
| KRT18                         | 4         | 2056        |
| KRT19                         | 0         | 2177        |
| <b>Mesenchymal markers</b>    |           |             |
| FN1                           | 8         | 26          |
| SERPINE1                      | 0         | 13          |
| CDH2                          | 3         | 0           |

tpm: transcript per million



**Table S2: SNaPshot tumor genotyping analysis of patients shown in figure 2c.**

| <b>Tumor</b> | <b>PI3K<sup>1</sup></b> | <b>TP53<sup>1</sup></b> | <b>Other Mutations<sup>2</sup></b> |
|--------------|-------------------------|-------------------------|------------------------------------|
| R1           | Wild-type               | Wild-type               | None                               |
| R2           | Mutant (E545-1633G)     | Wild-type               | None                               |
| R3           | Wild-type               | Wild-type               | None                               |
| R4           | Mutant (H1047-3140A)    | Mutant (R248-743G)      | None                               |
| R5           | Mutant (H1047-3140A)    | Wild-type               | None                               |
| P1           | Wild-type               | Mutant (R273H-818G)     | None                               |
| P2           | Mutant (E542-1624G)     | Wild-type               | None                               |
| P3           | Wild-type               | Wild-type               | None                               |
| P4           | Wild-type               | Wild-type               | None                               |
| P5           | Wild-type               | Wild-type               | None                               |

Mutational status of the primary tumors is based on the SNaPshot clinical tumor genotyping assay, which detects mutations in 60 different loci from 14 cancer genes (36).

<sup>1</sup> Mutations shown represent amino acid-cDNA residue <sup>2</sup> Genes analyzed for other mutations: AKT1, APC, BRAF, CTNNB1, EGFR, ERBB2 (HER-2), IDH1, KIT, KRAS, NOTCH1, NRAS, and PTEN. Patients responding to therapy: R1- R5; Patients progressing on therapy: P1-P5

**Table S3. The list of 45 genes expressed in E+ CTCs at all five time points.**

| Symbol           | Name                                                                           | Entrez<br>GeneID     | name in<br>Helicos<br>transcriptom<br>e |
|------------------|--------------------------------------------------------------------------------|----------------------|-----------------------------------------|
| TFF1             | Trefoil factor 1                                                               | 7031                 | TFF1                                    |
| KRT19            | Keratin 19                                                                     | 3880                 | KRT19                                   |
| SCGB2A2          | Secretoglobin, family 2A, member 2                                             | 4250                 | SCGB2A2                                 |
| TFF3             | Trefoil factor 3 (intestinal)                                                  | 7033                 | TFF3                                    |
| SLC39A6          | Solute carrier family 39 (zinc transporter), member 6                          | 25800                | SLC39A6                                 |
| MGP              | Matrix Gla protein                                                             | 4256                 | MGP                                     |
| MUCL1            | Mucin-like 1                                                                   | 118430               | SBEM                                    |
| XPOT             | Exportin, tRNA (nuclear export receptor for tRNAs)                             | 11260                | XPOT                                    |
| MRPL9            | Mitochondrial ribosomal protein L9                                             | 65005                | MRPL9                                   |
| ORAI2            | ORAI calcium release-activated calcium modulator 2                             | 80228                | TMEM142B                                |
| SCGB2A1          | Secretoglobin, family 2A, member 1                                             | 4246                 | SCGB2A1                                 |
| SCGB1D2          | Secretoglobin, family 1D, member 2                                             | 10647                | SCGB1D2                                 |
| CRABP2           | Cellular retinoic acid binding protein 2                                       | 1382                 | CRABP2                                  |
| MYO18A           | Myosin XVIIIa                                                                  | 399687               | MYO18A                                  |
| CRNKL1           | Crooked neck pre-mRNA splicing factor-like 1 (Drosophila)                      | 51340                | CRNKL1                                  |
| TRIAP1           | TP53 regulated inhibitor of apoptosis 1                                        | 51499                | TRIAP1                                  |
| IMP3             | IMP3, U3 small nucleolar ribonucleoprotein, homolog (yeast)                    | 55272                | IMP3                                    |
| DERL3            | Der1-like domain family, member 3                                              | 91319                | DERL3                                   |
| NKD2             | Naked cuticle homolog 2 (Drosophila)                                           | 85409                | NKD2                                    |
| HYAL1            | Hyaluronoglucosaminidase 1                                                     | 3373                 | HYAL1                                   |
| KRT8             | Keratin 8                                                                      | 3856                 | KRT8                                    |
| LOC641298<br>/// | SMG1 homolog, phosphatidylinositol 3-kinase-related kinase pseudogene          | 641298 ///<br>729602 | DKFZP547E08<br>7                        |
| LOC729602        |                                                                                |                      |                                         |
| SLC7A6           | Solute carrier family 7 (cationic amino acid transporter, y+ system), member 6 |                      | 9057 SLC7A6                             |
| ---              | ---                                                                            | ---                  | RP5-<br>1126H10.1                       |
| FSD1             | Fibronectin type III and SPRY domain containing 1                              | 79187                | FSD1                                    |
| MYST2            | MYST histone acetyltransferase 2                                               | 11143                | MYST2                                   |
| ZNF497           | Zinc finger protein 497                                                        | 162968               | ZNF497                                  |
| LYPLA1           | Lysophospholipase I                                                            | 10434                | LYPLA1                                  |
| GPR113           | G protein-coupled receptor 113                                                 | 165082               | GPR113                                  |
| BTG1             | B-cell translocation gene 1, anti-proliferative                                | 694                  | BTG1                                    |
| CDC27            | Cell division cycle 27 homolog (S. cerevisiae)                                 | 996                  | CDC27                                   |
| NBPF1            | Neuroblastoma breakpoint family, member 1                                      | 55672                | NBPF1                                   |
| SPTA1            | Spectrin, alpha, erythrocytic 1 (elliptocytosis 2)                             | 6708                 | SPTA1                                   |
| PIGW             | Phosphatidylinositol glycan anchor biosynthesis, class W                       | 284098               | PIGW                                    |
| ---              | ---                                                                            | ---                  | BC062763                                |
| CLDN4            | Claudin 4                                                                      |                      | 1364 HCPE-R                             |
| DIP2A            | DIP2 disco-interacting protein 2 homolog A (Drosophila)                        | 23181                | DIP2A                                   |
| HSPE1            | Heat shock 10kDa protein 1 (chaperonin 10)                                     | 3336                 | HSPE1                                   |
| DTX2             | Deltex homolog 2 (Drosophila)                                                  | 113878               | DTX2                                    |
| MTG1             | Mitochondrial GTPase 1 homolog (S. cerevisiae)                                 | 92170                | MTG1                                    |

|         |                                                                                  |               |
|---------|----------------------------------------------------------------------------------|---------------|
| NSUN5   | NOL1/NOP2/Sun domain family, member 5                                            | 55695 NSUN5   |
| TAF1C   | TATA box binding protein (TBP)-associated factor, RNA polymerase I, C,<br>110kDa | 9013 TAF1C    |
| ZBTB48  | Zinc finger and BTB domain containing 48                                         | 3104 PP9964   |
| ---     | ---                                                                              | --- AK124927  |
| ---     | ---                                                                              | --- AK094224  |
| ZNF70   | Zinc finger protein 70                                                           | 7621 ZNF70    |
| TNFAIP8 | Tumor necrosis factor, alpha-induced protein 8                                   | 25816 TNFAIP8 |
| ---     | ---                                                                              | --- BC070102  |
| PCTP    | Phosphatidylcholine transfer protein                                             | 58488 PCTP    |
| FES     | Feline sarcoma oncogene                                                          | 2242 FES      |

**Table S4. The list of GSEA gene signatures enriched in the 45 genes from Table S3.**

| name                                           | group     | subgroup  | specifics        | descr                                                                                                                                       | source          | num in set | num in intersection | num expected in intersection | odds ratio | p-val    | FWER     | FDR     | intersection                                   |
|------------------------------------------------|-----------|-----------|------------------|---------------------------------------------------------------------------------------------------------------------------------------------|-----------------|------------|---------------------|------------------------------|------------|----------|----------|---------|------------------------------------------------|
| SMID BREAST CANCER RELAPSE IN BONE UP          | tumor     | breast    | metastasis       | Genes up-regulated in bone relapse of breast cancer.                                                                                        | MSigDBv 3.0 CGP | 98         | 6                   | 0.2                          | 30.6       | 1.32E-07 | 0.000859 | 0.00077 | SCGB1D2, SCGB2A1, SCGB2A2, SLC39A6, TFF1, TFF3 |
| LIEN BREAST CARCINOMA METAPLASTIC VS DUCTAL DN | tumor     | breast    | MCB vs DCB       | Genes down-regulated between two breast carcinoma subtypes: metaplastic (MCB) and ductal (DCB).                                             | MSigDBv 3.0 CGP | 108        | 6                   | 0.3                          | 27.6       | 2.36E-07 | 0.00153  | 0.00077 | KRT19, MUC1L, SCGB1D2, SCGB2A1, SCGB2A2, TFF3  |
| SMID BREAST CANCER RELAPSE IN LUNG DN          | tumor     | breast    | metastasis       | Genes down-regulated in lung relapse of breast cancer.                                                                                      | MSigDBv 3.0 CGP | 38         | 4                   | 0.1                          | 52.7       | 2.14E-06 | 0.0139   | 0.00463 | SCGB1D2, SCGB2A1, SCGB2A2, TFF1                |
| DOANE BREAST CANCER ESR1 UP                    | tumor     | breast    | ER               | Genes changed in breast cancer samples according to the ESR1 [Gene ID=2099] status: ER positive vs ER negative tumors.                      | MSigDBv 3.0 CGP | 114        | 5                   | 0.3                          | 21         | 8.25E-06 | 0.0535   | 0.0134  | SCGB1D2, SCGB2A2, SLC39A6, TFF1, TFF3          |
| module 139                                     | others    |           |                  | Genes in module_139                                                                                                                         | MSigDBv 3.0 CM  | 74         | 4                   | 0.2                          | 25.5       | 3.13E-05 | 0.203    | 0.0406  | CLDN4, CRABP2, KRT19, KRT8                     |
| LI AMPLIFIED IN LUNG CANCER                    | tumor     | other     | amplicon         | Genes with increased copy number that correlates with increased expression across six different lung adenocarcinoma cell lines.             | MSigDBv 3.0 CGP | 164        | 5                   | 0.4                          | 14.3       | 4.77E-05 | 0.309    | 0.0442  | CLDN4, CRABP2, HSPE1, TFF1, TFF3               |
| SCHLOSSER MYC TARGETS REPRESSED BY SERUM       | tumor     | other     | MYC              | Cluster 7: genes up-regulated in B493-6 cells (B lymphocytes) by MYC [Gene ID=4609] and down-regulated by the combination of MYC and serum. | MSigDBv 3.0 CGP | 164        | 5                   | 0.4                          | 14.3       | 4.77E-05 | 0.309    | 0.0442  | HSPE1, LYPLA1, SLC39A6, TRIAP1, XPOT           |
| module 342                                     | others    |           |                  | Genes in module_342                                                                                                                         | MSigDBv 3.0 CM  | 198        | 5                   | 0.5                          | 11.8       | 0.000116 | 0.754    | 0.0944  | CLDN4, CRABP2, HYAL1, KRT19, KRT8              |
| module 180                                     | others    |           |                  | Genes in module_180                                                                                                                         | MSigDBv 3.0 CM  | 112        | 4                   | 0.3                          | 16.5       | 0.000158 | 1        | 0.114   | CLDN4, CRABP2, KRT19, KRT8                     |
| WANG CISPLATIN RESPONSE AND XPC UP             | tumor     | other     |                  | Genes up-regulated in fibroblasts with defective XPC [Gene ID=7508] in response to cisplatin [PubChem=2767].                                | MSigDBv 3.0 CGP | 136        | 4                   | 0.3                          | 13.5       | 0.000332 | 1        | 0.215   | CLDN4, KRT8, MGP, TFF1                         |
| HUPER BREAST BASAL VS LUMINAL DN               | tumor     | breast    | basal vs luminal | Genes down-regulated in basal mammary epithelial cells compared to the luminal ones.                                                        | MSigDBv 3.0 CGP | 59         | 3                   | 0.1                          | 23.4       | 0.000399 | 1        | 0.236   | CLDN4, KRT19, KRT8                             |
| CASPASE REGULATOR ACTIVITY                     | signaling | apoptosis |                  | Genes annotated by the GO term GO:0043028. Modulates the activity of a caspase, any of a group of cysteine proteases involved in apoptosis. | MSigDBv 3.0 MF  | 13         | 2                   | 0                            | 77.8       | 0.000445 | 1        | 0.241   | TNFAIP8, TRIAP1                                |

**Table S5. The list of 170 genes expressed in M+ clusters.**

| Symbol   | Name                                                                                          | Entrez GeneID | name in Helicos transcriptome |
|----------|-----------------------------------------------------------------------------------------------|---------------|-------------------------------|
| SERPINE1 | Serpin peptidase inhibitor, clade E (nexin, plasminogen activator inhibitor type 1), member 1 | 5054          | SERPINE1                      |
| CTGF     | Connective tissue growth factor                                                               | 1490          | CTGF                          |
| FN1      | Fibronectin 1                                                                                 | 2335          | FN1                           |
| ELN      | Elastin                                                                                       | 2006          | ELN                           |
| PODXL    | Podocalyxin-like                                                                              | 5420          | PODXL                         |
| LAMB1    | Laminin, beta 1                                                                               | 3912          | LAMB1                         |
| IGFBP7   | Insulin-like growth factor binding protein 7                                                  | 3490          | IGFBP7                        |
| HSPG2    | Heparan sulfate proteoglycan 2                                                                | 3339          | HSPG2                         |
| POSTN    | Periostin, osteoblast specific factor                                                         | 10631         | POSTN                         |
| ANO1     | Anoctamin 1, calcium activated chloride channel                                               | 55107         | TMEM16A                       |
| COL3A1   | Collagen, type III, alpha 1                                                                   | 1281          | COL3A1                        |
| CFH      | Complement factor H                                                                           | 3075          | CFH                           |
| CXCR7    | Chemokine (C-X-C motif) receptor 7                                                            | 57007         | CXCR7                         |
| TM4SF1   | Transmembrane 4 L six family member 1                                                         | 4071          | TM4SF1                        |
| GJA1     | Gap junction protein, alpha 1, 43kDa                                                          | 2697          | GJA1                          |
| HEG1     | HEG homolog 1 (zebrafish)                                                                     | 57493         | HEG1                          |
| HMCN1    | Hemicentin 1                                                                                  | 83872         | HMCN1                         |
| COL6A1   | Collagen, type VI, alpha 1                                                                    | 1291          | COL6A1                        |
| SLCO2A1  | Solute carrier organic anion transporter family, member 2A1                                   | 6578          | SLCO2A1                       |
| ENG      | Endoglin                                                                                      | 2022          | ENG                           |
| AQP1     | Aquaporin 1 (Colton blood group)                                                              | 358           | AQP1                          |
| CDH13    | Cadherin 13, H-cadherin (heart)                                                               | 1012          | CDH13                         |
| MMP2     | Matrix metalloproteinase 2 (gelatinase A, 72kDa gelatinase, 72kDa type IV collagenase)        | 4313          | MMP2                          |
| PLK2     | Polo-like kinase 2 (Drosophila)                                                               | 10769         | PLK2                          |
| EFEMP1   | EGF-containing fibulin-like extracellular matrix protein 1                                    | 2202          | EFEMP1                        |
| CAV1     | Caveolin 1, caveolae protein, 22kDa                                                           | 857           | CAV1                          |
| SULF1    | Sulfatase 1                                                                                   | 23213         | SULF1                         |
| CDH11    | Cadherin 11, type 2, OB-cadherin (osteoblast)                                                 | 1009          | CDH11                         |
| ANGPTL2  | Angiopoietin-like 2                                                                           | 23452         | ANGPTL2                       |
| ITGB4    | Integrin, beta 4                                                                              | 3691          | ITGB4                         |
| DPYSL3   | Dihydropyrimidinase-like 3                                                                    | 1809          | DPYSL3                        |
| LTBP4    | Latent transforming growth factor beta binding protein 4                                      | 8425          | LTBP4                         |
| WWTR1    | WW domain containing transcription regulator 1                                                | 25937         | WWTR1                         |
| FLNB     | Filamin B, beta                                                                               | 2317          | FLNB                          |
| RHOJ     | Ras homolog gene family, member J                                                             | 57381         | RHOJ                          |
| HYAL2    | Hyaluronoglucosaminidase 2                                                                    | 8692          | HYAL2                         |
| CDH5     | Cadherin 5, type 2 (vascular endothelium)                                                     | 1003          | CDH5                          |
| PLA2G2A  | Phospholipase A2, group IIA (platelets, synovial fluid)                                       | 5320          | PLA2G2A                       |
| EMP1     | Epithelial membrane protein 1                                                                 | 2012          | EMP1                          |
| ITGA9    | Integrin, alpha 9                                                                             | 3680          | ITGA9                         |
| LAMB2    | Laminin, beta 2 (laminin 5)                                                                   | 3913          | LAMB2                         |
| COL1A2   | Collagen, type I, alpha 2                                                                     | 1278          | COL1A2                        |
| ECM1     | Extracellular matrix protein 1                                                                | 1893          | ECM1                          |
| DKK3     | Dickkopf homolog 3 (Xenopus laevis)                                                           | 27122         | DKK3                          |
| CRIP2    | Cysteine-rich protein 2                                                                       | 1397          | CRIP2                         |
| TNXB     | Tenascin XB                                                                                   | 7148          | TNXB                          |
| BMPER    | BMP binding endothelial regulator                                                             | 168667        | BMPER                         |
| SCARA3   | Scavenger receptor class A, member 3                                                          | 51435         | SCARA3                        |
| FSTL1    | Follistatin-like 1                                                                            | 11167         | FSTL1                         |
| PTRF     | Polymerase I and transcript release factor                                                    | 284119        | PTRF                          |
| BGN      | Biglycan                                                                                      | 633           | BGN                           |
| MMRN2    | Multimerin 2                                                                                  | 79812         | MMRN2                         |
| PTPRB    | Protein tyrosine phosphatase, receptor type, B                                                | 5787          | PTPRB                         |
| TIE1     | Tyrosine kinase with immunoglobulin-like and EGF-like domains 1                               | 7075          | TIE1                          |
| NOS3     | Nitric oxide synthase 3 (endothelial cell)                                                    | 4846          | NOS3                          |
| LRIG1    | Leucine-rich repeats and immunoglobulin-like domains 1                                        | 26018         | LRIG1                         |
| TPPP3    | Tubulin polymerization-promoting protein family member 3                                      | 51673         | CGI-38                        |
| STAB1    | Stabilin 1                                                                                    | 23166         | STAB1                         |
| GPRC5B   | G protein-coupled receptor, family C, group 5, member B                                       | 51704         | GPRC5B                        |

|          |                                                                                               |                |
|----------|-----------------------------------------------------------------------------------------------|----------------|
| RNASE1   | Ribonuclease, RNase A family, 1 (pancreatic)                                                  | 6035 RNASE1    |
| PLXND1   | Plexin D1                                                                                     | 23129 PLXND1   |
| COL4A2   | Collagen, type IV, alpha 2                                                                    | 1284 COL4A2    |
| FLNC     | Filamin C, gamma                                                                              | 2318 FLNC      |
| CGNL1    | Cingulin-like 1                                                                               | 84952 CGNL1    |
| LEPR     | Leptin receptor                                                                               | 3953 LEPR      |
| SLC29A1  | Solute carrier family 29 (nucleoside transporters), member 1                                  | 2030 ENT1      |
| LOXL2    | Lysyl oxidase-like 2                                                                          | 4017 LOXL2     |
| DKK2     | Dickkopf homolog 2 (Xenopus laevis)                                                           | 27123 DKK2     |
| PLTP     | Phospholipid transfer protein                                                                 | 5360 PLTP      |
| CCDC3    | Coiled-coil domain containing 3                                                               | 83643 CCDC3    |
| EHD2     | EH-domain containing 2                                                                        | 30846 EHD2     |
| CD9      | CD9 molecule                                                                                  | 928 CD9        |
| ---      | ---                                                                                           | ---            |
| TEK      | TEK tyrosine kinase, endothelial                                                              | 7010 TEK       |
| ITGAV    | Integrin, alpha V (vitronectin receptor, alpha polypeptide, antigen CD51)                     | 3685 ITGAV     |
| SERPINE2 | Serpin peptidase inhibitor, clade E (nexin, plasminogen activator inhibitor type 1), member 2 | 5270 SERPINE2  |
| S100A16  | S100 calcium binding protein A16                                                              | 140576 S100A16 |
| APCDD1   | Adenomatosis polyposis coli down-regulated 1                                                  | 147495 APCDD1  |
| LAMA4    | Laminin, alpha 4                                                                              | 3910 LAMA4     |
| TXNDC5   | Thioredoxin domain containing 5 (endoplasmic reticulum)                                       | 81567 TXNDC5   |
| COL6A2   | Collagen, type VI, alpha 2                                                                    | 1292 COL6A2    |
| GPR116   | G protein-coupled receptor 116                                                                | 221395 GPR116  |
| PLXNA4   | Plexin A4                                                                                     | 91584 PLXNA4   |
| CD34     | CD34 molecule                                                                                 | 947 CD34       |
| PKHD1L1  | Polycystic kidney and hepatic disease 1 (autosomal recessive)-like 1                          | 93035 PKHD1L1  |
| IL1R1    | Interleukin 1 receptor, type I                                                                | 3554 IL1R1     |
| PERP     | PERP, TP53 apoptosis effector                                                                 | 64065 PERP     |
| BMP6     | Bone morphogenetic protein 6                                                                  | 654 BMP6       |
| CLEC3B   | C-type lectin domain family 3, member B                                                       | 7123 CLEC3B    |
| FSCN1    | Fascin homolog 1, actin-bundling protein (Strongylocentrotus purpuratus)                      | 6624 FSCN1     |
| S100A10  | S100 calcium binding protein A10                                                              | 6281 S100A10   |
| TNFRSF21 | Tumor necrosis factor receptor superfamily, member 21                                         | 27242 TNFRSF21 |
| DOCK6    | Dedicator of cytokinesis 6                                                                    | 57572 DOCK6    |
| DSTN     | Destrin (actin depolymerizing factor)                                                         | 11034 DSTN     |
| ITGA6    | Integrin, alpha 6                                                                             | 3655 ITGA6     |
| LTBP3    | Latent transforming growth factor beta binding protein 3                                      | 4054 LTBP3     |
| COL5A2   | Collagen, type V, alpha 2                                                                     | 1290 COL5A2    |
| GOLM1    | Golgi membrane protein 1                                                                      | 51280 GOLM1    |
| CRIM1    | Cysteine rich transmembrane BMP regulator 1 (chordin-like)                                    | 51232 CRIM1    |
| MDK      | Midkine (neurite growth-promoting factor 2)                                                   | 4192 MDK       |
| CD59     | CD59 molecule, complement regulatory protein                                                  | 966 CD59       |
| SLC29A1  | Solute carrier family 29 (nucleoside transporters), member 1                                  | 2030 SLC29A1   |
| RHOC     | Ras homolog gene family, member C                                                             | 389 RHOC       |
| LIMS2    | LIM and senescent cell antigen-like domains 2                                                 | 55679 LIMS2    |
| AGRN     | Agrin                                                                                         | 375790 AGRN    |
| FBLN2    | Fibulin 2                                                                                     | 2199 FBLN2     |
| BCAM     | Basal cell adhesion molecule (Lutheran blood group)                                           | 4059 BCAM      |
| ANXA2    | Annexin A2                                                                                    | 302 ANXA2      |
| PTMS     | Parathyrosin                                                                                  | 5763 PTMS      |
| SYNPO    | Synaptopodin                                                                                  | 11346 SYNPO    |
| IL33     | Interleukin 33                                                                                | 90865 IL33     |
| EPHB4    | EPH receptor B4                                                                               | 2050 EPHB4     |
| VCAN     | Versican                                                                                      | 1462 VCAN      |
| ALDH1A2  | Aldehyde dehydrogenase 1 family, member A2                                                    | 8854 ALDH1A2   |
| NPDC1    | Neural proliferation, differentiation and control, 1                                          | 56654 NPDC1    |
| LRRC32   | Leucine rich repeat containing 32                                                             | 2615 LRRC32    |
| MRC2     | Mannose receptor, C type 2                                                                    | 9902 MRC2      |
| PLEC     | Plectin 1, intermediate filament binding protein 500kDa                                       | 5339 PLEC1     |
| FBXL7    | F-box and leucine-rich repeat protein 7                                                       | 23194 FBXL7    |
| MEST     | Mesoderm specific transcript homolog (mouse)                                                  | 4232 MEST      |
| GATA6    | GATA binding protein 6                                                                        | 2627 GATA6     |
| CD151    | CD151 molecule (Raph blood group)                                                             | 977 CD151      |
| MYOF     | Myoferlin                                                                                     | 26509 FER1L3   |

|                                   |                                                                                        |           |               |
|-----------------------------------|----------------------------------------------------------------------------------------|-----------|---------------|
| FOXC1                             | Forkhead box C1                                                                        | 2296      | FOXC1         |
| ADAM15                            | ADAM metallopeptidase domain 15                                                        | 8751      | ADAM15        |
| MUC1                              | Mucin 1, cell surface associated                                                       | 4582      | MUC1          |
| ARHGAP23                          | Rho GTPase activating protein 23                                                       | 57636     | ARHGAP23      |
| SCARB2                            | Scavenger receptor class B, member 2                                                   | 950       | SCARB2        |
| CRIP1                             | Cysteine-rich protein 1 (intestinal)                                                   | 1396      | CRIP1         |
| PTPRB                             | Protein tyrosine phosphatase, receptor type, B                                         | 5787      | DKFZP686E2262 |
| VIM                               | Vimentin                                                                               | 7431      | VIM           |
| SEMA3F                            | Sema domain, immunoglobulin domain (Ig), short basic domain, secreted, (semaphorin) 3F | 6405      | SEMA3F        |
| ADAMTS1                           | ADAM metallopeptidase with thrombospondin type 1 motif, 1                              | 9510      | ADAMTS1       |
| FAM38A                            | Family with sequence similarity 38, member A                                           | 9780      | FAM38A        |
| PLS3                              | Plastin 3 (T isoform)                                                                  | 5358      | PLS3          |
| NRG1                              | Neuregulin 1                                                                           | 3084      | NRG1          |
| PVRL2                             | Poliovirus receptor-related 2 (herpesvirus entry mediator B)                           | 5819      | PVRL2         |
| SLC9A3R2                          | Solute carrier family 9 (sodium/hydrogen exchanger), member 3 regulator 2              | 9351      | SLC9A3R2      |
| HSPB1                             | Heat shock 27kDa protein 1                                                             | 3315      | HSPB1         |
| DCHS1                             | Dachsous 1 (Drosophila)                                                                | 8642      | DCHS1         |
| ATP1A1                            | ATPase, Na <sup>+</sup> /K <sup>+</sup> transporting, alpha 1 polypeptide              | 476       | ATP1A1        |
| COL5A1                            | Collagen, type V, alpha 1                                                              | 1289      | COL5A1        |
| PTGIS                             | Prostaglandin I2 (prostacyclin) synthase                                               | 5740      | PTGIS         |
| ROBO4                             | Roundabout homolog 4, magic roundabout (Drosophila)                                    | 54538     | ROBO4         |
| TJP1                              | Tight junction protein 1 (zona occludens 1)                                            | 7082      | TJP1          |
| GAS6                              | Growth arrest-specific 6                                                               | 2621      | GAS6          |
| A4GALT                            | Alpha 1,4-galactosyltransferase                                                        | 53947     | A4GALT        |
| MYH10                             | Myosin, heavy chain 10, non-muscle                                                     | 4628      | MYH10         |
| FBN1                              | Fibrillin 1                                                                            | 2200      | FBN1          |
| KIAA1522                          | KIAA1522                                                                               | 57648     | KIAA1522      |
| ITFG3                             | Integrin alpha FG-GAP repeat containing 3                                              | 83986     | ITFG3         |
| SPTAN1                            | Spectrin, alpha, non-erythrocytic 1 (alpha-fodrin)                                     | 6709      | SPTAN1        |
| PLVAP                             | Plasmalemma vesicle associated protein                                                 | 83483     | PLVAP         |
| IL1RL1                            | Interleukin 1 receptor-like 1                                                          | 9173      | IL1RL1        |
| GATA4                             | GATA binding protein 4                                                                 | 2626      | GATA4         |
| LPHN2                             | Latrophilin 2                                                                          | 23266     | LPHN2         |
| SFRP5                             | Secreted frizzled-related protein 5                                                    | 6425      | SFRP5         |
| CDC42BPB                          | CDC42 binding protein kinase beta (DMPK-like)                                          | 9578      | CDC42BPB      |
| NTN1                              | Netrin 1                                                                               | 9423      | NTN1          |
| PALM                              | Paralemmin                                                                             | 5064      | PALM          |
| MAOA                              | Monoamine oxidase A                                                                    | 4128      | MAOA          |
| RBMS2                             | RNA binding motif, single stranded interacting protein 2                               | 5939      | RBMS2         |
| NFE2L1                            | Nuclear factor (erythroid-derived 2)-like 1                                            | 4779      | NFE2L1        |
| MMP28                             | Matrix metallopeptidase 28                                                             | 79148     | MMP28         |
| FGD5                              | FYVE, RhoGEF and PH domain containing 5                                                | 152273    | FGD5          |
| EPS8                              | Epidermal growth factor receptor pathway substrate 8                                   | 2059      | EPS8          |
| MAGED1                            | Melanoma antigen family D, 1                                                           | 9500      | MAGED1        |
| ID1                               | Inhibitor of DNA binding 1, dominant negative helix-loop-helix protein                 | 3397      | ID1           |
| PPP2R5B                           | Protein phosphatase 2, regulatory subunit B', beta isoform                             | 5526      | PPP2R5B       |
| ---                               | ---                                                                                    | ---       | AK023507      |
| KIF1C                             | Kinesin family member 1C                                                               | 10749     | KIF1C         |
| MARVELD1                          | MARVEL domain containing 1                                                             | 83742     | MARVELD1      |
| IFI27 /// PSMD9<br>/// SSSCA1 /// | Interferon, alpha-inducible protein 27                                                 | 3429 ///  | P27           |
| DCTN6                             |                                                                                        | 5715 ///  |               |
|                                   |                                                                                        | 10534 /// |               |
|                                   |                                                                                        | 10671     |               |
| EDN1                              | Endothelin 1                                                                           | 1906      | EDN1          |

**Table S6. The list of GSEA gene signatures enriched in the 170 genes from Table S5.**

| name                                     | group  | subgroup  | specifics  | descr                                                                                                                                                                                                                                                                                                                                                                                       | source         | num in set | num in intersection | num expected in intersection | odds ratio | p-val    | FWER     | FDR      | intersection                                                                                                                                                                                                                                                                                                 |
|------------------------------------------|--------|-----------|------------|---------------------------------------------------------------------------------------------------------------------------------------------------------------------------------------------------------------------------------------------------------------------------------------------------------------------------------------------------------------------------------------------|----------------|------------|---------------------|------------------------------|------------|----------|----------|----------|--------------------------------------------------------------------------------------------------------------------------------------------------------------------------------------------------------------------------------------------------------------------------------------------------------------|
| module 47                                | ECM    | component |            | Genes in module_47: ECM and collagens                                                                                                                                                                                                                                                                                                                                                       | MSigDBv3.0 CM  | 216        | 38                  | 2                            | 29.3       | 4.00E-38 | 2.60E-34 | 2.60E-34 | ADAMTS1, AQP1, BGN, CD34, CDH11, CDH5, CLEC3B, COL1A2, COL3A1, COL4A2, COL5A2, COL6A1, COL6A2, CTGF, DKK3, DPYSL3, ECM1, FBLN2, FBN1, FN1, GAS6, GJA1, IGFBP7, LAMB1, LOXL2, LRRC32, MMP2, MRC2, PLTP, PLXND1, POSTN, PTGIS, SERPINE1, TEK, TIE1, VCAN, VIM, WWTR1                                           |
| module 1                                 | others |           |            | Genes in module_1: Ovary genes                                                                                                                                                                                                                                                                                                                                                              | MSigDBv3.0 CM  | 358        | 43                  | 3.3                          | 19.3       | 7.30E-36 | 4.74E-32 | 2.37E-32 | ALDH1A2, ANGPTL2, AQP1, BCAM, CAV1, CD151, CD34, CDH11, CFH, CLEC3B, COL1A2, COL3A1, COL5A2, COL6A1, COL6A2, CRIM1, CRIP1, DPYSL3, EMP1, ENG, EPS8, FBN1, FBXL7, FN1, GJA1, HEG1, HSPG2, IFI27, IL1R1, ITGA6, LAMB1, LAMB2, MDK, PLA2G2A, PLXND1, PTGIS, PVRL2, RNASE1, SERPINE1, STAB1, TM4SF1, TNXB, WWTR1 |
| module 2                                 | others |           |            | Genes in module_2: DRG (dorsal root ganglia) genes                                                                                                                                                                                                                                                                                                                                          | MSigDBv3.0 CM  | 375        | 37                  | 3.4                          | 14.8       | 1.15E-27 | 7.45E-24 | 2.48E-24 | AQP1, CAV1, CD151, CD34, CDH5, CFH, CLEC3B, COL1A2, COL3A1, COL6A1, COL6A2, CRIM1, CRIP1, DPYSL3, EMP1, ENG, EPS8, FBLN2, FBN1, FN1, GJA1, HSPG2, IFI27, IL1R1, ITGA6, ITGB4, LAMA4, LAMB1, LAMB2, LEPR, MAOA, PLA2G2A, SLC29A1, STAB1, TM4SF1, TNXB, WWTR1                                                  |
| module 5                                 | others |           |            | Genes in module_5: Lung genes                                                                                                                                                                                                                                                                                                                                                               | MSigDBv3.0 CM  | 421        | 38                  | 3.9                          | 13.5       | 5.49E-27 | 3.56E-23 | 8.91E-24 | ANXA2, AQP1, BCAM, CAV1, CD151, CD34, CDH11, CDH5, CLEC3B, COL1A2, COL3A1, COL6A1, COL6A2, CRIM1, CRIP1, DPYSL3, ENG, FN1, GJA1, HEG1, HSPG2, ID1, IFI27, IL1R1, ITGA6, LAMB2, LRRC32, MAOA, MUC1, PLXND1, POSTN, RNASE1, STAB1, TEK, TM4SF1, TNXB, VCAN, WWTR1                                              |
| SCHUETZ BREAST CANCER DUCTAL INVASIVE UP | tumor  | breast    | aggressive | Genes up-regulated in invasive ductal carcinoma (IDC) relative to ductal carcinoma in situ (DCIS, non-invasive).                                                                                                                                                                                                                                                                            | MSigDBv3.0 CGP | 353        | 35                  | 3.2                          | 14.7       | 3.03E-26 | 1.97E-22 | 3.94E-23 | ANGPTL2, BGN, CDH11, CFH, COL1A2, COL3A1, COL4A2, COL5A1, COL5A2, COL6A1, COL6A2, CTGF, CXCR7, DPYSL3, EMP1, FBLN2, FBN1, FN1, FSTL1, GPR116, HEG1, IGFBP7, IL1R1, LAMA4, LAMB1, LOXL2, MMP2, MRC2, PLS3, POSTN, PTRF, SERPINE2, SULF1, VCAN, WWTR1                                                          |
| REN ALVEOLAR RHABDOMYOSARCOMA DN         | tumor  | other     |            | Genes commonly down-regulated in human alveolar rhabdomyosarcoma (ARMS) and its mouse model overexpressing PAX3-FOXO1 [Gene ID=5077, 2308] fusion.                                                                                                                                                                                                                                          | MSigDBv3.0 CGP | 411        | 36                  | 3.8                          | 12.9       | 4.12E-25 | 2.67E-21 | 4.46E-22 | ANXA2, CAV1, CD151, COL5A1, COL5A2, COL6A1, COL6A2, CTGF, DPYSL3, ECM1, EFEMP1, EMP1, ENG, FBN1, FN1, FSTL1, GAS6, GJA1, IGFBP7, ITGAV, LAMA4, LOXL2, MMP2, MRC2, NPDC1, NRG1, PLS3, PSMD9, PTRF, RHOC, S100A10, SCARA3, SERPINE2, TM4SF1, TXNDC5, VCAN                                                      |
| module 38                                | others |           |            | Genes in module_38: Planceta genes                                                                                                                                                                                                                                                                                                                                                          | MSigDBv3.0 CM  | 454        | 37                  | 4.2                          | 11.9       | 1.07E-24 | 6.93E-21 | 9.90E-22 | CAV1, CD151, CD34, CDH5, CLEC3B, COL1A2, COL3A1, COL5A2, COL6A1, COL6A2, CRIM1, CRIP1, ECM1, ELN, ENG, FBLN2, FN1, HEG1, HSPG2, IFI27, IL1R1, ITGB4, LAMB2, LRRC32, MAOA, MEST, MMP2, PLA2G2A, PLXND1, PVRL2, RNASE1, SEMA3F, SERPINE1, SLC29A1, STAB1, TM4SF1, TNXB                                         |
| PICCALUGA ANGIOIMMUNOBLASTIC LYMPHOMA UP | tumor  | other     |            | Up-regulated genes in angioimmunoblastic lymphoma (AILT) compared to normal T lymphocytes.                                                                                                                                                                                                                                                                                                  | MSigDBv3.0 CGP | 207        | 27                  | 1.9                          | 19         | 1.53E-23 | 9.92E-20 | 1.24E-20 | ADAMTS1, CDH11, CDH5, CFH, COL1A2, COL3A1, COL4A2, COL6A1, DPYSL3, ENG, FBN1, FN1, FSTL1, GJA1, GPR116, GPRC5B, HSPG2, IFI27, IGFBP7, IL33, ITGA9, LAMA4, LAMB1, PTRF, SULF1, TJP1, WWTR1                                                                                                                    |
| GNF2 CDH11                               | EMT    | gene      | CDH11      | Neighborhood of CDH11                                                                                                                                                                                                                                                                                                                                                                       | MSigDBv3.0 CGN | 25         | 13                  | 0.2                          | 126.6      | 9.55E-21 | 6.19E-17 | 6.89E-18 | CDH11, COL1A2, COL3A1, COL5A1, COL5A2, COL6A1, COL6A2, FBN1, FN1, FSTL1, LAMB1, LOXL2, SERPINE1                                                                                                                                                                                                              |
| EXTRACELLULAR REGION PART                | ECM    |           |            | Genes annotated by the GO term GO:0044421. Any constituent part of the extracellular region, the space external to the outermost structure of a cell. For CC cells without external protective or external encapsulating structures this refers to space outside of the plasma membrane. This term covers constituent parts of the host cell environment outside an intracellular parasite. | MSigDBv3.0     | 332        | 29                  | 3                            | 12.2       | 2.89E-20 | 1.87E-16 | 1.88E-17 | AGRN, ANGPTL2, CDH13, CFH, COL1A2, COL3A1, COL4A2, COL5A1, COL5A2, CTGF, DKK2, DKK3, ECM1, EDN1, EFEMP1, FBLN2, FBN1, FSTL1, LAMA4, LAMB1, LAMB2, LOXL2, LTBP4, MMP2, POSTN, SEMA3F, SFRP5, TNXB, VCAN                                                                                                       |



|                                                 |        |            |                 |                                                                                                                                                                                                                                                                                                                   |                    |     |    |     |      |          |          |          |                                                                                                                                                                                                                                                                      |
|-------------------------------------------------|--------|------------|-----------------|-------------------------------------------------------------------------------------------------------------------------------------------------------------------------------------------------------------------------------------------------------------------------------------------------------------------|--------------------|-----|----|-----|------|----------|----------|----------|----------------------------------------------------------------------------------------------------------------------------------------------------------------------------------------------------------------------------------------------------------------------|
| KEGG ECM RECEPTOR INTERACTION                   | ECM    | receptor   |                 | ECM-receptor interaction                                                                                                                                                                                                                                                                                          | MSigDBv3.0 CP:KEGG | 83  | 18 | 0.8 | 33.3 | 3.73E-20 | 2.42E-16 | 2.04E-17 | AGRN, COL1A2, COL3A1, COL4A2, COL5A1, COL5A2, COL6A1, COL6A2, FN1, HSPG2, ITGA6, ITGA9, ITGAV, ITGB4, LAMA4, LAMB1, LAMB2, TNXB                                                                                                                                      |
| LIU PROSTATE CANCER DN                          | tumor  | other      |                 | Genes down-regulated in prostate cancer samples.                                                                                                                                                                                                                                                                  | MSigDBv3.0 CGP     | 466 | 33 | 4.3 | 10   | 3.77E-20 | 2.45E-16 | 2.04E-17 | ANGPTL2, ANO1, ANXA2, ARHGAP23, CAV1, COL1A2, COL4A2, COL5A1, COL6A1, CRIM1, CXCR7, DKK3, DPYSL3, EFEMP1, EHD2, FBN1, FGD5, FLNC, GAS6, GJA1, HSPB1, HSPG2, ID1, IL33, ITGA9, LAMA4, LAMB1, LAMB2, MARVELD1, MRC2, MYOF, PTRF, RHOJ                                  |
| EXTRACELLULAR REGION                            | ECM    | component  |                 | Genes annotated by the GO term GO:0005576. The space external to the outermost structure of a cell. For cells without external protective or external encapsulating structures this refers to space outside of the plasma membrane. This term covers the host cell environment outside an intracellular parasite. | MSigDBv3.0 CC      | 439 | 31 | 4   | 9.8  | 6.41E-19 | 4.15E-15 | 3.20E-16 | AGRN, ANGPTL2, CDH13, CFH, COL1A2, COL3A1, COL4A2, COL5A1, COL5A2, CTGF, DKK2, DKK3, ECM1, EDN1, EFEMP1, FBLN2, FBN1, FSTL1, LAMA4, LAMB1, LAMB2, LOXL2, LTBP4, MMP2, PLA2G2A, PLTP, POSTN, SEMA3F, SFRP5, TNXB, VCAN                                                |
| ONDER CDH1 TARGETS 2 UP                         | EMT    | gene       | CDH1            | Genes up-regulated in HMLE cells (immortalized nontransformed mammary epithelium) after E-cadherin (CDH1) [Gene ID=999] knockdown by RNAi.                                                                                                                                                                        | MSigDBv3.0 CGP     | 254 | 25 | 2.3 | 13.6 | 8.04E-19 | 5.21E-15 | 3.73E-16 | BGN, CDH11, CLEC3B, COL1A2, COL3A1, COL5A1, COL5A2, COL6A1, COL6A2, CRIP2, CTGF, CXCR7, DPYSL3, EPS8, FBN1, FN1, IGFBP7, LEPR, LRIG1, MAGED1, MMP2, PODXL, POSTN, SERPINE1, VCAN                                                                                     |
| PROTEINACEOUS EXTRACELLULAR MATRIX              | ECM    | component  |                 | Genes annotated by the GO term GO:0005578. A layer consisting mainly of proteins (especially collagen) and glycosaminoglycans (mostly as proteoglycans) that forms a sheet underlying or overlying cells such as endothelial and epithelial cells. The proteins are secreted by cells in the vicinity.            | MSigDBv3.0 CC      | 98  | 18 | 0.9 | 27.1 | 9.14E-19 | 5.92E-15 | 3.95E-16 | AGRN, COL1A2, COL3A1, COL4A2, COL5A1, COL5A2, CTGF, ECM1, EFEMP1, FBLN2, FBN1, LAMA4, LAMB1, LAMB2, LTBP4, POSTN, TNXB, VCAN                                                                                                                                         |
| CHARAFE BREAST CANCER LUMINAL VS MESENCHYMAL DN | tumor  | breast     | EMT-mesenchymal | Genes down-regulated in luminal-like breast cancer cell lines compared to the mesenchymal-like ones.                                                                                                                                                                                                              | MSigDBv3.0 CGP     | 446 | 31 | 4.1 | 9.6  | 1.01E-18 | 6.55E-15 | 4.10E-16 | ANXA2, ARHGAP23, CAV1, CDH11, COL4A2, COL5A1, COL6A1, COL6A2, CRIM1, DKK3, ENG, FBN1, FLNC, FOXC1, FSCN1, FSTL1, GJA1, GPRC5B, HEG1, IGFBP7, ITGAV, LAMB1, LOXL2, MARVELD1, MMP2, MRC2, PTRF, SERPINE1, SERPINE2, VIM, WWTR1                                         |
| EXTRACELLULAR MATRIX                            | ECM    | component  |                 | Genes annotated by the GO term GO:0031012. A structure lying external to one or more cells, which provides structural support for cells or tissues; may be completely external to the cell (as in animals) or be part of the cell (as in plants).                                                                 | MSigDBv3.0 CC      | 100 | 18 | 0.9 | 26.4 | 1.34E-18 | 8.68E-15 | 5.12E-16 | AGRN, COL1A2, COL3A1, COL4A2, COL5A1, COL5A2, CTGF, ECM1, EFEMP1, FBLN2, FBN1, LAMA4, LAMB1, LAMB2, LTBP4, POSTN, TNXB, VCAN                                                                                                                                         |
| module 6                                        | others |            |                 | Genes in module_6: Trachea genes                                                                                                                                                                                                                                                                                  | MSigDBv3.0 CM      | 404 | 29 | 3.7 | 9.8  | 6.28E-18 | 4.07E-14 | 2.27E-15 | AQP1, CAV1, CD151, CD34, CFH, CLEC3B, COL1A2, COL6A1, COL6A2, CRIM1, CRIP1, DPYSL3, ENG, FBLN2, FN1, HSPG2, IFI27, ITGA6, ITGB4, LAMB2, MAOA, MDK, MUC1, PLA2G2A, RNASE1, STAB1, TM4SF1, TNXB, WWTR1                                                                 |
| module 12                                       | others |            |                 | Genes in module_12: Spinal cord (neuro-development) genes                                                                                                                                                                                                                                                         | MSigDBv3.0 CM      | 349 | 27 | 3.2 | 10.6 | 1.46E-17 | 9.45E-14 | 4.99E-15 | AQP1, CAV1, CLEC3B, COL1A2, COL3A1, COL5A2, COL6A1, COL6A2, CRIM1, DPYSL3, ELN, ENG, FBXL7, FN1, GJA1, GPRC5B, HSPG2, ITGA6, ITGB4, LAMB2, PALM, POSTN, RNASE1, SERPINE1, STAB1, VCAN, WWTR1                                                                         |
| module 122                                      | ECM    | adhesion   |                 | Genes in module_122: Adhesion molecules                                                                                                                                                                                                                                                                           | MSigDBv3.0 CM      | 138 | 19 | 1.3 | 19.3 | 2.75E-17 | 1.78E-13 | 8.93E-15 | BGN, CD151, CDH13, CDH5, COL3A1, COL5A1, COL5A2, COL6A1, COL6A2, CTGF, ELN, FBN1, FN1, ITGAV, LAMA4, LAMB1, LAMB2, POSTN, TNXB                                                                                                                                       |
| WU CELL MIGRATION                               | EMT    | migration  |                 | Genes associated with migration rate of 40 human bladder cancer cells.                                                                                                                                                                                                                                            | MSigDBv3.0 CGP     | 185 | 21 | 1.7 | 15.6 | 3.11E-17 | 2.01E-13 | 9.62E-15 | ADAMTS1, COL4A2, COL6A2, DKK3, EFEMP1, EPS8, FN1, GJA1, IGFBP7, ITGB4, LOXL2, MAOA, MEST, PERP, PODXL, SERPINE1, TM4SF1, TNFRSF21, VCAN, VIM, WWTR1                                                                                                                  |
| module 88                                       | others | metabolism |                 | Genes in module_88: Heart, liver, Kidney and pancreas metabolic and xenobiotic response genes                                                                                                                                                                                                                     | MSigDBv3.0 CM      | 814 | 38 | 7.5 | 6.5  | 5.74E-17 | 3.71E-13 | 1.69E-14 | AQP1, BCAM, CAV1, CD151, CFH, CLEC3B, COL1A2, COL3A1, COL5A2, COL6A1, COL6A2, CRIM1, ECM1, ELN, ENG, FBLN2, FBXL7, FN1, GPRC5B, HSPG2, IFI27, IL1R1, ITGA6, LAMB2, LRRC32, MAOA, MDK, MMP2, MUC1, PALM, PLA2G2A, PTGIS, PVRL2, RNASE1, SERPINE1, STAB1, TM4SF1, TNXB |
| module 60                                       | others |            |                 | Genes in module_60: Heart genes                                                                                                                                                                                                                                                                                   | MSigDBv3.0 CM      | 409 | 28 | 3.7 | 9.3  | 8.47E-17 | 5.48E-13 | 2.39E-14 | AQP1, BCAM, CD151, CD34, CDH5, CLEC3B, COL1A2, COL6A1, COL6A2, CRIP1, ELN, ENG, FBLN2, FN1, HSPG2, IFI27, ITGB4, LAMB2, LRRC32, PLXND1, PTGIS, PVRL2, RNASE1, SEMA3F, SLC29A1, STAB1, TJP1, TNXB                                                                     |
| GNF2 PTX3                                       | others | genes      | PTX3            | Neighborhood of PTX3                                                                                                                                                                                                                                                                                              | MSigDBv3.0 CGN     | 36  | 12 | 0.3 | 58   | 2.45E-16 | 1.59E-12 | 6.63E-14 | CDH11, COL1A2, COL3A1, COL5A1, COL5A2, CTGF, EFEMP1, FBN1, FSTL1, LAMB1, LOXL2, SERPINE1                                                                                                                                                                             |

|                                                         |           |                     |                 |                                                                                                                                                                                                                                                     |                    |     |    |     |      |          |          |          |                                                                                                                                                                                                                                    |
|---------------------------------------------------------|-----------|---------------------|-----------------|-----------------------------------------------------------------------------------------------------------------------------------------------------------------------------------------------------------------------------------------------------|--------------------|-----|----|-----|------|----------|----------|----------|------------------------------------------------------------------------------------------------------------------------------------------------------------------------------------------------------------------------------------|
| CHIARADONNA NEOPLASTIC TRANSFORMATION CDC25 DN          | tumor     | other               |                 | Genes down-regulated in reverted NIH3T3 cells (fibroblasts transformed by activated KRAS [Gene ID=3845] which then reverted to normal cells upon stable over-expression of a dominant negative form of CDC25 [Gene ID=5923]) vs normal fibroblasts. | MSigDBv3.0 CGP     | 148 | 18 | 1.4 | 16.6 | 1.85E-15 | 1.20E-11 | 4.81E-13 | AGRN, AQP1, CD151, CD34, CD9, CLEC3B, COL4A2, COL5A2, CTGF, ELN, FBN1, ITGB4, NFE2L1, PLTP, RBMS2, SEMA3F, SLC29A1, TNXB                                                                                                           |
| ROZANOV MMP14 TARGETS SUBSET                            | ECM       | component           | MMP14-regulated | Genes linked to the ECM maintenance and angiogenesis that were changed in HT1080 cells (fibrosarcoma) over-expressing MMP14 [Gene ID=4323] compared to those with knockdown of the gene by RNAi.                                                    | MSigDBv3.0 CGP     | 33  | 11 | 0.3 | 57.7 | 4.49E-15 | 2.90E-11 | 1.12E-12 | ANGPTL2, COL4A2, COL5A1, COL6A1, COL6A2, EFEMP1, FN1, LAMA4, LAMB1, MDK, PLXND1                                                                                                                                                    |
| module 3                                                | others    |                     |                 | Genes in module_3                                                                                                                                                                                                                                   | MSigDBv3.0 CM      | 375 | 25 | 3.4 | 8.9  | 8.09E-15 | 5.23E-11 | 1.94E-12 | ANXA2, CAV1, CD151, CRIM1, DPYSL3, EFEMP1, EMP1, ENG, FN1, FSTL1, GJA1, HSPG2, ITGA6, LAMB1, LOXL2, MDK, MEST, PLK2, PLS3, PLXND1, SERPINE1, SLC29A1, STAB1, TM4SF1, WWTR1                                                         |
| KEGG FOCAL ADHESION                                     | ECM       | adhesion            |                 | Focal adhesion                                                                                                                                                                                                                                      | MSigDBv3.0 CP:KEGG | 198 | 19 | 1.8 | 12.8 | 2.46E-14 | 1.59E-10 | 5.71E-12 | CAV1, COL1A2, COL3A1, COL4A2, COL5A1, COL5A2, COL6A1, COL6A2, FLNB, FLNC, FN1, ITGA6, ITGA9, ITGAV, ITGB4, LAMA4, LAMB1, LAMB2, TNXB                                                                                               |
| GU PDEF TARGETS UP                                      | signaling | integrin,VEGF, TGFB | PDEF            | Integrin, VEGF, Wnt and TGF-?? signaling pathway genes up-regulated in PC-3 cells (prostate cancer) after knockdown of PDEF [Gene ID=25803] by RNAi.                                                                                                | MSigDBv3.0 CGP     | 68  | 13 | 0.6 | 27.6 | 4.10E-14 | 2.65E-10 | 9.18E-12 | CDH11, COL4A2, COL5A1, COL5A2, COL6A1, COL6A2, CTGF, DKK3, FN1, ITGA6, LAMB2, SERPINE1, VIM                                                                                                                                        |
| HOSHIDA LIVER CANCER SUBCLASS S1                        | signaling | WNT                 |                 | Genes from 'subtype S1' signature of hepatocellular carcinoma (HCC): aberrant activation of the WNT signaling pathway.                                                                                                                              | MSigDBv3.0 CGP     | 236 | 20 | 2.2 | 11.2 | 5.35E-14 | 3.46E-10 | 1.16E-11 | ADAM15, AQP1, CD151, CDH11, COL1A2, COL3A1, COL4A2, COL5A2, COL6A1, COL6A2, CRIP2, CTGF, EFEMP1, FBN1, LAMB1, LTBP3, POSTN, RNASE1, S100A10, VCAN                                                                                  |
| ZHU CMV 24 HR DN                                        | others    |                     |                 | Down-regulated at 24 h following infection of primary human foreskin fibroblasts with CMV                                                                                                                                                           | MSigDBv3.0 CGP     | 54  | 12 | 0.5 | 33.1 | 5.83E-14 | 3.76E-10 | 1.22E-11 | CD151, CDH11, COL1A2, COL3A1, COL5A2, COL6A2, EFEMP1, LAMB2, POSTN, PTGIS, SERPINE1, VCAN                                                                                                                                          |
| module 19                                               | others    | metabolism          |                 | Genes in module_19: Adrenal gland- metabolic genes                                                                                                                                                                                                  | MSigDBv3.0 CM      | 305 | 22 | 2.8 | 9.5  | 7.56E-14 | 4.88E-10 | 1.53E-11 | CD34, CLEC3B, COL1A2, COL6A1, COL6A2, ENG, FBXL7, FSTL1, GJA1, HSPG2, IFI27, IL1R1, LAMB2, LRRC32, MAOA, PVRL2, RNASE1, SLC29A1, STAB1, TNXB, VCAN, WWTR1                                                                          |
| module 52                                               | tumor     | other               |                 | Genes in module_52: Cell line expressed genes                                                                                                                                                                                                       | MSigDBv3.0 CM      | 416 | 25 | 3.8 | 7.9  | 8.58E-14 | 5.54E-10 | 1.69E-11 | ANXA2, CAV1, CD151, COL5A2, CRIM1, DPYSL3, EFEMP1, EMP1, ENG, EPS8, FN1, GJA1, HSPG2, IFI27, ITGA6, LAMB1, LOXL2, MDK, MEST, PLK2, RNASE1, SERPINE1, STAB1, TM4SF1, WWTR1                                                          |
| ZHU CMV ALL DN                                          | others    |                     |                 | Down-regulated at any timepoint following infection of primary human foreskin fibroblasts with CMV                                                                                                                                                  | MSigDBv3.0 CGP     | 72  | 13 | 0.7 | 25.7 | 8.98E-14 | 5.80E-10 | 1.71E-11 | CD151, CDH11, COL1A2, COL3A1, COL5A2, COL6A2, EFEMP1, ENG, LAMB2, POSTN, PTGIS, SERPINE1, VCAN                                                                                                                                     |
| CHIARADONNA NEOPLASTIC TRANSFORMATION KRAS DN           | tumor     | other               |                 | Genes down-regulated in transformed NIH3T3 cells (fibroblasts transformed by activated KRAS [Gene ID=3845]) vs normal cells.                                                                                                                        | MSigDBv3.0 CGP     | 135 | 16 | 1.2 | 15.9 | 1.09E-13 | 7.05E-10 | 2.02E-11 | AQP1, CD151, CD9, COL1A2, COL4A2, COL5A1, COL5A2, CTGF, ELN, FBN1, FSTL1, LAMB2, PLTP, RBMS2, SLC29A1, TNXB                                                                                                                        |
| ROZANOV MMP14 TARGETS UP                                | EMT       | MMP                 |                 | Genes up-regulated in HT1080 cells (fibrosarcoma) over-expressing MMP14 [Gene ID=4323] compared to those with knockdown of the gene by RNAi.                                                                                                        | MSigDBv3.0 CGP     | 261 | 20 | 2.4 | 10   | 3.58E-13 | 2.31E-09 | 6.34E-11 | ANGPTL2, CGNL1, COL4A2, COL5A1, COL6A1, COL6A2, CTGF, DSTN, EFEMP1, FN1, HEG1, IGFBP7, IL1R1, LAMA4, LAMB1, LRIG1, MDK, PLK2, PLXND1, SLC02A1                                                                                      |
| CROONQUIST STROMAL STIMULATION UP                       | signaling | IL6                 |                 | Genes up-regulated in ANBL-6 cell line (multiple myeloma, MM) co-cultured with bone marrow stromal cells compared to those grown in the presence of IL6 [Gene ID=3569].                                                                             | MSigDBv3.0 CGP     | 47  | 11 | 0.4 | 35.2 | 3.62E-13 | 2.33E-09 | 6.34E-11 | COL1A2, COL6A1, CTGF, FSCN1, ID1, IGFBP7, LAMA4, MYOF, SERPINE1, SULF1, VCAN                                                                                                                                                       |
| module 55                                               | others    |                     |                 | Genes in module_55                                                                                                                                                                                                                                  | MSigDBv3.0 CM      | 809 | 33 | 7.4 | 5.4  | 3.91E-13 | 2.52E-09 | 6.67E-11 | AQP1, BCAM, CAV1, CFH, CLEC3B, COL1A2, COL3A1, COL5A2, COL6A1, COL6A2, CRIM1, ECM1, ELN, ENG, FBXL7, FN1, HSPG2, IFI27, IL1R1, ITGA6, LAMB2, LRRC32, MAOA, MMP2, MUC1, PALM, PLA2G2A, PVRL2, RNASE1, SERPINE1, STAB1, TM4SF1, TNXB |
| MANALO HYPOXIA UP                                       | signaling | hypoxia             |                 | Genes up-regulated in response to both hypoxia and overexpression of an active form of HIF1A [Gene ID=3091].                                                                                                                                        | MSigDBv3.0 CGP     | 207 | 18 | 1.9 | 11.4 | 6.71E-13 | 4.33E-09 | 1.12E-10 | BGN, COL1A2, COL4A2, COL5A1, CXCR7, DCHS1, DKK3, EDN1, GAS6, LAMB1, LEPR, LOXL2, LRRC32, MMP2, PTGIS, PTPRB, SERPINE1, SYNPO                                                                                                       |
| LINDGREN BLADDER CANCER CLUSTER 2B                      | tumor     | other               |                 | Genes specifically up-regulated in Cluster IIb of urothelial cell carcinom (UCC) tumors.                                                                                                                                                            | MSigDBv3.0 CGP     | 379 | 23 | 3.5 | 7.9  | 7.48E-13 | 4.83E-09 | 1.20E-10 | ANGPTL2, AQP1, CAV1, COL1A2, COL5A2, COL6A1, COL6A2, CRIP1, CTGF, DKK3, EFEMP1, ELN, FBLN2, GPR116, IGFBP7, LAMA4, LAMB2, LRIG1, MMP2, PODXL, POSTN, PTRF, SYNPO                                                                   |
| TURASHVILI BREAST LOBULAR CARCINOMA VS DUCTAL NORMAL UP | tumor     | breast              | aggressive      | Genes up-regulated in lobular carcinoma vs normal ductal breast cells.                                                                                                                                                                              | MSigDBv3.0 CGP     | 66  | 12 | 0.6 | 25.8 | 7.61E-13 | 4.91E-09 | 1.20E-10 | BGN, COL1A2, COL3A1, COL5A1, COL5A2, FBN1, FN1, LAMB1, POSTN, SULF1, TIE1, VCAN                                                                                                                                                    |
| TONKS TARGETS OF RUNX1 RUNX1T1 FUSION ERYTHROCYTE UP    | others    |                     |                 | Genes up-regulated in erythroid lineage cells by RUNX1-RUNX1T1 [Gene ID=861, 862] fusion .                                                                                                                                                          | MSigDBv3.0 CGP     | 159 | 16 | 1.5 | 13.2 | 1.43E-12 | 9.23E-09 | 2.21E-10 | ALDH1A2, ANXA2, COL1A2, DKK2, ECM1, EMP1, HSPB1, ID1, MYOF, PALM, PLK2, PLTP, SPTAN1, TM4SF1, TNFRSF21, VCAN                                                                                                                       |

|                                                          |           |            |            |                                                                                                                                                                                                                                                                                                                  |                        |     |    |     |      |          |          |          |                                                                                                                                                                                            |
|----------------------------------------------------------|-----------|------------|------------|------------------------------------------------------------------------------------------------------------------------------------------------------------------------------------------------------------------------------------------------------------------------------------------------------------------|------------------------|-----|----|-----|------|----------|----------|----------|--------------------------------------------------------------------------------------------------------------------------------------------------------------------------------------------|
| TURASHVILI BREAST LOBULAR CARCINOMA VS LOBULAR NORMAL DN | tumor     | breast     | aggressive | Genes down-regulated in lobular carcinoma vs normal lobular breast cells.                                                                                                                                                                                                                                        | MSigDBv3.0 CGP         | 70  | 12 | 0.6 | 24   | 1.59E-12 | 1.03E-08 | 2.40E-10 | BGN, COL1A2, COL3A1, COL4A2, COL5A1, COL5A2, FBN1, FN1, LAMB1, MMP2, POSTN, VCAN                                                                                                           |
| SMID BREAST CANCER LUMINAL B DN                          | tumor     | breast     | luminal    | Genes down-regulated in the luminal B subtype of breast cancer.                                                                                                                                                                                                                                                  | MSigDBv3.0 CGP         | 574 | 27 | 5.3 | 6.1  | 2.71E-12 | 1.74E-08 | 3.99E-10 | ADAMTS1, AQP1, CAV1, COL4A2, CTGF, EDN1, EFEMP1, ELN, FBLN2, FOXC1, FSCN1, GPR116, ID1, IL33, ITGA6, LEPR, PERP, PLA2G2A, PLTP, PTGIS, SERPINE2, TIE1, TM4SF1, TNFRSF21, TNXB, VCAN, WWTR1 |
| KAAB HEART ATRIUM VS VENTRICLE UP                        | others    |            |            | Genes up-regulated in the atria of healthy hearts, compared to ventricles.                                                                                                                                                                                                                                       | MSigDBv3.0 CGP         | 258 | 19 | 2.4 | 9.5  | 2.91E-12 | 1.87E-08 | 4.19E-10 | ALDH1A2, CFH, CRIP1, CTGF, DPYSL3, EFEMP1, EPS8, FBLN2, HEG1, HSPG2, IL1R1, IL1RL1, MAGED1, MDK, PLA2G2A, PTGIS, SYNPO, VCAN, VIM                                                          |
| EXTRACELLULAR MATRIX PART                                | ECM       | component  |            | Genes annotated by the GO term GO:0044420. Any constituent part of the extracellular matrix, the structure lying external to one or more cells, which provides structural support for cells or tissues; may be completely external to the cell (as in animals) or be part of the cell (as often seen in plants). | MSigDBv3.0 CC          | 57  | 11 | 0.5 | 27.6 | 3.54E-12 | 2.28E-08 | 4.99E-10 | AGRN, COL1A2, COL3A1, COL4A2, COL5A1, COL5A2, FBN1, LAMA4, LAMB1, LAMB2, TNXB                                                                                                              |
| RODWELL AGING KIDNEY NO BLOOD UP                         | others    |            |            | Genes whose expression increases with age in normal kidney, excluding those with higher expression in blood.                                                                                                                                                                                                     | MSigDBv3.0 CGP         | 153 | 15 | 1.4 | 12.8 | 1.08E-11 | 6.94E-08 | 1.49E-09 | ANXA2, CDH11, COL1A2, COL3A1, COL5A1, DKK3, FBN1, FN1, FSCN1, MYOF, PLK2, PTRF, SERPINE2, STAB1, TXNDC5                                                                                    |
| SANA TNF SIGNALING DN                                    | others    |            |            | Genes down-regulated in five primary endothelial cell types (lung, aortic, iliac, dermal, and colon) by TNF [Gene ID=7124].                                                                                                                                                                                      | MSigDBv3.0 CGP         | 82  | 12 | 0.8 | 19.9 | 1.13E-11 | 7.27E-08 | 1.52E-09 | ANXA2, BGN, CD34, CRIP2, CTGF, EFEMP1, ITGA6, MYOF, NOS3, POSTN, RHOJ, TXNDC5                                                                                                              |
| KINSEY TARGETS OF EWSR1 FLII FUSION DN                   | tumor     | other      |            | Genes down-regulated in TC71 and EWS502 cells (Ewing's sarcoma) upon knockdown of the EWSR1-FLII fusion [Gene ID=2130, 2314].                                                                                                                                                                                    | MSigDBv3.0 CGP         | 315 | 20 | 2.9 | 8.2  | 1.15E-11 | 7.40E-08 | 1.52E-09 | ANGPTL2, CD59, COL3A1, COL5A1, COL5A2, FBN1, FLNB, FN1, FOXC1, FSTL1, HMCN1, IGFBP7, LAMA4, LAMB2, LTBP3, MAGED1, POSTN, S100A10, SPTAN1, VIM                                              |
| module 44                                                | others    |            |            | Genes in module_44: Thymus genes                                                                                                                                                                                                                                                                                 | MSigDBv3.0 CM          | 316 | 20 | 2.9 | 8.1  | 1.22E-11 | 7.84E-08 | 1.58E-09 | AQP1, CAV1, CD34, CLEC3B, COL1A2, COL6A1, COL6A2, CRIM1, CRIP1, ENG, FN1, FSTL1, HSPG2, IFI27, IL1R1, ITGA6, MAOA, PLXND1, RNASE1, STAB1                                                   |
| module 24                                                | others    | metabolism |            | Genes in module_24: Fetal liver genes - Metabolism and xenobiotics                                                                                                                                                                                                                                               | MSigDBv3.0 CM          | 444 | 23 | 4.1 | 6.7  | 1.91E-11 | 1.23E-07 | 2.41E-09 | AQP1, BCAM, CFH, CLEC3B, COL1A2, COL3A1, COL5A2, COL6A1, COL6A2, ECM1, ELN, ENG, FN1, HSPG2, IL1R1, LAMB2, MAOA, PLA2G2A, PVRL2, SERPINE1, SLC29A1, STAB1, TNXB                            |
| ROY WOUND BLOOD VESSEL UP                                | others    |            |            | Genes up-regulated in blood vessel cells from wound site.                                                                                                                                                                                                                                                        | MSigDBv3.0 CGP         | 49  | 10 | 0.4 | 29.4 | 1.93E-11 | 1.24E-07 | 2.41E-09 | ANGPTL2, CDH5, COL3A1, COL5A2, FBXL7, HEG1, POSTN, SLC02A1, SULF1, VCAN                                                                                                                    |
| VERRECCHIA EARLY RESPONSE TO TGFB1                       | signaling | TGFB       | ECM        | ECM related genes up-regulated early (within 30 min) in dermal fibroblasts after addition of TGFB1 [Gene ID=7040].                                                                                                                                                                                               | MSigDBv3.0 CGP         | 51  | 10 | 0.5 | 27.9 | 2.96E-11 | 1.90E-07 | 3.62E-09 | CD59, COL1A2, COL3A1, COL6A1, FN1, HSPG2, LAMA4, RHOC, SERPINE1, VCAN                                                                                                                      |
| DOUGLAS BMI1 TARGETS UP                                  | tumor     | other      |            | Genes up-regulated in A4573 cells (Ewing's sarcoma, ESFT) after knockdown of BMI1 [Gene ID=648] by RNAi.                                                                                                                                                                                                         | MSigDBv3.0 CGP         | 509 | 24 | 4.7 | 6.1  | 4.74E-11 | 3.05E-07 | 5.70E-09 | ADAMTS1, ANGPTL2, APCDD1, BGN, CCDC3, COL4A2, COL5A1, COL6A1, COL6A2, DCHS1, DKK2, DKK3, DOCK6, ECM1, ELN, FN1, GPRC5B, HYAL2, LOXL2, MMP2, PLTP, PODXL, S100A10, SLC29A1                  |
| GRUETZMANN PANCREATIC CANCER UP                          | tumor     | other      |            | Genes up-regulated in pancreatic ductal adenocarcinoma (PDAC) identified in a meta analysis across four independent studies.                                                                                                                                                                                     | MSigDBv3.0 CGP         | 346 | 20 | 3.2 | 7.4  | 6.23E-11 | 4.01E-07 | 7.35E-09 | CAV1, CD9, COL5A2, CRIP2, DPYSL3, ECM1, EPS8, FBLN2, FBN1, FN1, ITGB4, LAMA4, LOXL2, MMP2, MYH10, PLEC, POSTN, S100A10, SERPINE1, VCAN                                                     |
| LI WILMS TUMOR VS FETAL KIDNEY 1 UP                      | tumor     | other      |            | Genes up-regulated in Wilm's tumor samples compared to fetal kidney.                                                                                                                                                                                                                                             | MSigDBv3.0 CGP         | 182 | 15 | 1.7 | 10.5 | 1.30E-10 | 8.36E-07 | 1.51E-08 | AGRN, ATP1A1, CDH5, COL1A2, CRIM1, DSTN, GPRC5B, IGFBP7, IL1R1, LRRC32, MYOF, PLS3, PODXL, S100A10, TEK                                                                                    |
| VERHAAK AML WITH NPM1 MUTATED DN                         | tumor     | other      |            | Genes down-regulated in acute myeloid leukemia (AML) patients with mutated NPM1 [Gene ID=4869].                                                                                                                                                                                                                  | MSigDBv3.0 CGP         | 255 | 17 | 2.3 | 8.5  | 2.05E-10 | 1.32E-06 | 2.34E-08 | CAV1, CD34, DCHS1, EMP1, EPS8, FLNB, GJA1, HSPB1, HSPG2, IGFBP7, ITGA6, MEST, PALM, PLXND1, PTRF, SERPINE2, TNFRSF21                                                                       |
| CROONQUIST NRAS VS STROMAL STIMULATION DN                | tumor     | other      |            | Genes down-regulated in ANBL-6 cell line (multiple myeloma, MM) expressing an activated form of NRAS [Gene ID=4893] off a plasmid vector compared to those co-cultured with bone marrow stromal cells.                                                                                                           | MSigDBv3.0 CGP         | 82  | 11 | 0.8 | 17.8 | 2.21E-10 | 1.42E-06 | 2.47E-08 | COL1A2, CTGF, FSCN1, GJA1, ID1, IGFBP7, LAMA4, LAMB1, POSTN, SULF1, VCAN                                                                                                                   |
| REACTOME AXON GUIDANCE                                   | others    |            |            | Genes involved in Axon guidance                                                                                                                                                                                                                                                                                  | MSigDBv3.0 CP:REACTOME | 159 | 14 | 1.5 | 11.3 | 2.29E-10 | 1.47E-06 | 2.51E-08 | AGRN, COL1A2, COL3A1, COL4A2, COL5A1, COL5A2, COL6A1, COL6A2, DPYSL3, MYH10, PLXNA4, PLXND1, RHOC, SPTAN1                                                                                  |
| LU AGING BRAIN DN                                        | others    |            |            | Genes down-regulated in postmortem brain frontal cortex samples from old subjects compared to those from the young ones.                                                                                                                                                                                         | MSigDBv3.0 CGP         | 264 | 17 | 2.4 | 8.1  | 3.52E-10 | 2.26E-06 | 3.80E-08 | CAV1, CFH, DPYSL3, EFEMP1, GJA1, GPRC5B, IL33, ITGAV, LRIG1, MAOA, MYOF, PODXL, RNASE1, TM4SF1, VCAN, VIM, WWTR1                                                                           |
| PETRETTO CARDIAC HYPERTROPHY                             | others    |            |            | Genes that correlated most highly with left ventricular mass (LVM) index.                                                                                                                                                                                                                                        | MSigDBv3.0 CGP         | 34  | 8  | 0.3 | 34.9 | 6.24E-10 | 4.01E-06 | 6.63E-08 | COL5A2, CRIM1, EFEMP1, FBN1, FN1, FSTL1, LTBP3, TM4SF1                                                                                                                                     |
| LANDIS ERBB2 BREAST TUMORS 324 DN                        | tumor     | breast     | ERBB2      | The 324 genes identified by two analytical methods as changed in the mammary tumors induced by transgenic expression of ERBB2 [Gene ID=2064].                                                                                                                                                                    | MSigDBv3.0 CGP         | 142 | 13 | 1.3 | 11.7 | 6.34E-10 | 4.07E-06 | 6.63E-08 | ANGPTL2, CD151, CD34, CLEC3B, COL3A1, COL5A1, COL6A1, CRIP1, FSTL1, GAS6, GJA1, POSTN, PTPRB                                                                                               |

|                                                                   |           |          |            |                                                                                                                                                                                                                                                                                                                                                                                                                                                                                                                                                                |                        |      |    |     |      |          |          |          |                                                                                                                                                                                                                  |
|-------------------------------------------------------------------|-----------|----------|------------|----------------------------------------------------------------------------------------------------------------------------------------------------------------------------------------------------------------------------------------------------------------------------------------------------------------------------------------------------------------------------------------------------------------------------------------------------------------------------------------------------------------------------------------------------------------|------------------------|------|----|-----|------|----------|----------|----------|------------------------------------------------------------------------------------------------------------------------------------------------------------------------------------------------------------------|
| DELYS THYROID CANCER UP                                           | tumor     | other    |            | Genes up-regulated in papillary thyroid carcinoma (PTC) compared to normal tissue.                                                                                                                                                                                                                                                                                                                                                                                                                                                                             | MSigDBv3.0 CGP         | 398  | 20 | 3.6 | 6.3  | 7.35E-10 | 4.72E-06 | 7.57E-08 | AGRN, ANXA2, CD151, COL3A1, COL5A2, DPYSL3, ECM1, EPS8, FN1, GPRC5B, ITGA9, LOXL2, MDK, MRC2, MUC1, MYH10, PLXND1, S100A10, SEMA3F, TNFRSF21                                                                     |
| BRUECKNER TARGETS OF MIRLET7A3 DN                                 | tumor     | other    |            | Genes down-regulated in A549 cells (lung cancer) expressing MIRLET7A3 [Gene ID=406883] microRNA off a plasmid vector.                                                                                                                                                                                                                                                                                                                                                                                                                                          | MSigDBv3.0 CGP         | 75   | 10 | 0.7 | 17.6 | 1.59E-09 | 1.02E-05 | 1.61E-07 | COL4A2, COL5A1, DPYSL3, EFEMP1, FLNB, FN1, GPRC5B, LOXL2, PLK2, VIM                                                                                                                                              |
| WINTER HYPOXIA METAGENE                                           | signaling | hypoxia  |            | Genes regulated by hypoxia, based on literature searches.                                                                                                                                                                                                                                                                                                                                                                                                                                                                                                      | MSigDBv3.0 CGP         | 218  | 15 | 2   | 8.7  | 1.62E-09 | 1.04E-05 | 1.62E-07 | ANXA2, COL5A1, COL5A2, EDN1, ENG, FN1, IFI27, MMP2, MUC1, NOS3, PSM29, SERPINE1, SSSCA1, TEK, VIM                                                                                                                |
| ANATOMICAL STRUCTURE DEVELOPMENT                                  | others    |          |            | Genes annotated by the GO term GO:0048856. The biological process whose specific outcome is the progression of an anatomical structure from an initial condition to its mature state. This process begins with the formation of the structure and ends with the mature structure, whatever form that may be including its natural destruction. An anatomical structure is any biological entity that occupies space and is distinguished from its surroundings. Anatomical structures can be macroscopic such as a carpal, or microscopic such as an acrosome. | MSigDBv3.0 BP          | 1002 | 31 | 9.2 | 4    | 2.19E-09 | 1.41E-05 | 2.15E-07 | AGRN, ANXA2, CD9, CDC42BPB, CDH13, CLEC3B, COL1A2, COL4A2, COL5A2, CRIM1, CTGF, DKK3, DPYSL3, ELN, EMP1, ENG, EPHB4, FBN1, FGDS, FOXC1, GATA4, GATA6, LAMB1, MDK, MEST, NFE2L1, POSTN, ROBO4, SFRP5, STAB1, TIE1 |
| module 324                                                        | others    |          |            | Genes in module_324: metal/Ca ion binding                                                                                                                                                                                                                                                                                                                                                                                                                                                                                                                      | MSigDBv3.0 CM          | 131  | 12 | 1.2 | 11.6 | 2.93E-09 | 1.88E-05 | 2.84E-07 | ANXA2, CDH13, CDH5, EFEMP1, FBLN2, FBN1, FSTL1, GAS6, MMP2, PLA2G2A, PLS3, S100A10                                                                                                                               |
| module 84                                                         | others    |          |            | Genes in module_84: Immune (humoral) and inflammatory response                                                                                                                                                                                                                                                                                                                                                                                                                                                                                                 | MSigDBv3.0 CM          | 527  | 22 | 4.8 | 5.3  | 3.14E-09 | 2.01E-05 | 2.99E-07 | AQP1, CAV1, CLEC3B, COL1A2, COL6A1, COL6A2, CRIM1, ENG, FN1, HSPG2, IFI27, IGFBP7, IL1R1, ITGA6, LRRC32, MDK, MUC1, PVRL2, RNASE1, SERPINE1, TNXB, VCAN                                                          |
| REACTOME INTEGRIN CELL SURFACE INTERACTIONS                       | ECM       | receptor |            | Genes involved in Integrin cell surface interactions                                                                                                                                                                                                                                                                                                                                                                                                                                                                                                           | MSigDBv3.0 CP:REACTOME | 81   | 10 | 0.7 | 16.1 | 3.43E-09 | 2.20E-05 | 3.22E-07 | COL1A2, COL4A2, FBN1, FN1, ITGA6, ITGA9, ITGAV, ITGB4, LAMB1, LAMB2                                                                                                                                              |
| VECCHI GASTRIC CANCER ADVANCED VS EARLY UP                        | tumor     | other    | aggressive | Up-regulated genes distinguishing between two subtypes of gastric cancer: advanced (AGC) and early (EGC).                                                                                                                                                                                                                                                                                                                                                                                                                                                      | MSigDBv3.0 CGP         | 163  | 13 | 1.5 | 10.1 | 3.48E-09 | 2.23E-05 | 3.22E-07 | BGN, CDH11, COL1A2, COL3A1, COL5A2, EFEMP1, FBN1, FN1, FSTL1, MYH10, SULF1, VCAN, WWTR1                                                                                                                          |
| module 118                                                        | tumor     | other    |            | Genes in module_118: Cell line expressed genes                                                                                                                                                                                                                                                                                                                                                                                                                                                                                                                 | MSigDBv3.0 CM          | 393  | 19 | 3.6 | 6.1  | 3.79E-09 | 2.44E-05 | 3.47E-07 | CAV1, CD151, COL5A2, CRIM1, DPYSL3, EFEMP1, EMP1, ENG, FN1, GIA1, HSPG2, IFI27, ITGA6, LAMB1, LOXL2, MDK, MMP2, SERPINE1, TM4SF1                                                                                 |
| SUNG METASTASIS STROMA UP                                         | tumor     | other    | metastasis | Genes up-regulated in metastatic vs non-metastatic stromal cells originated from either bone or prostate tissues.                                                                                                                                                                                                                                                                                                                                                                                                                                              | MSigDBv3.0 CGP         | 107  | 11 | 1   | 13.2 | 4.01E-09 | 2.57E-05 | 3.59E-07 | AGRN, CD59, COL3A1, COL5A1, COL5A2, EPS8, FBLN2, GOLM1, HSPG2, PLK2, VCAN                                                                                                                                        |
| WANG SMARCE1 TARGETS UP                                           | tumor     | other    |            | Genes up-regulated in BT549 cells (breast cancer) by expression of SMARCE1 [Gene ID=6605] off a retroviral vector.                                                                                                                                                                                                                                                                                                                                                                                                                                             | MSigDBv3.0 CGP         | 165  | 13 | 1.5 | 9.9  | 4.03E-09 | 2.59E-05 | 3.59E-07 | BCAM, CFH, COL3A1, COL5A1, DPYSL3, FN1, HEG1, IL1R1, MMP2, PLXND1, POSTN, SULF1, VCAN                                                                                                                            |
| REACTOME CELL JUNCTION ORGANIZATION                               | ECM       | adhesion |            | Genes involved in Cell junction organization                                                                                                                                                                                                                                                                                                                                                                                                                                                                                                                   | MSigDBv3.0 CP:REACTOME | 83   | 10 | 0.8 | 15.7 | 4.37E-09 | 2.81E-05 | 3.84E-07 | CD151, CDH11, CDH13, CDH5, FLNC, ITGA6, ITGB4, LIMS2, PLEC, PVRL2                                                                                                                                                |
| REACTOME NCAM1 INTERACTIONS                                       | ECM       | adhesion | NCAM1      | Genes involved in NCAM1 interactions                                                                                                                                                                                                                                                                                                                                                                                                                                                                                                                           | MSigDBv3.0 CP:REACTOME | 43   | 8  | 0.4 | 25.9 | 4.65E-09 | 2.98E-05 | 4.02E-07 | AGRN, COL1A2, COL3A1, COL4A2, COL5A1, COL5A2, COL6A1, COL6A2                                                                                                                                                     |
| CHARAFE BREAST CANCER LUMINAL VS BASAL DN                         | tumor     | breast   | EMT-basal  | Genes down-regulated in luminal-like breast cancer cell lines compared to the basal-like ones.                                                                                                                                                                                                                                                                                                                                                                                                                                                                 | MSigDBv3.0 CGP         | 447  | 20 | 4.1 | 5.6  | 5.38E-09 | 3.45E-05 | 4.54E-07 | ANXA2, ARHGAP23, ATP1A1, CAV1, CD59, CDH13, COL4A2, EMP1, FSCN1, FSTL1, IFI27, IGFBP7, ITGA6, LOXL2, PERP, PLS3, PTRF, S100A10, SERPINE2, WWTR1                                                                  |
| SENESE HDAC1 TARGETS DN                                           | tumor     | other    |            | Genes down-regulated in U2OS cells (osteosarcoma) upon knockdown of HDAC1 [Gene ID=3065] by RNAi.                                                                                                                                                                                                                                                                                                                                                                                                                                                              | MSigDBv3.0 CGP         | 238  | 15 | 2.2 | 7.9  | 5.38E-09 | 3.45E-05 | 4.54E-07 | BCAM, CDH13, COL3A1, COL5A1, DKK3, EDN1, FSTL1, GOLM1, KIAA1522, LAMB2, MAGED1, MRC2, MYH10, PTRF, S100A10                                                                                                       |
| TONKS TARGETS OF RUNX1 RUNX1T1 FUSION SUSTAINED IN ERYTHROCYTE UP | others    |          |            | Genes up-regulated by RUNX1-RUNX1T1 [Gene ID=861, 862] fusion protein in normal hematopoietic progenitors; their expression was sustained in subsequently developing erythroid lineage.                                                                                                                                                                                                                                                                                                                                                                        | MSigDBv3.0 CGP         | 44   | 8  | 0.4 | 25.2 | 5.64E-09 | 3.61E-05 | 4.69E-07 | ALDH1A2, ANXA2, ECM1, EMP1, HSPB1, ID1, TM4SF1, VCAN                                                                                                                                                             |
| WEST ADRENOCORTICAL TUMOR DN                                      | tumor     | other    |            | Down-regulated genes in pediatric adrenocortical tumors (ACT) compared to the normal tissue.                                                                                                                                                                                                                                                                                                                                                                                                                                                                   | MSigDBv3.0 CGP         | 547  | 22 | 5   | 5    | 6.19E-09 | 3.97E-05 | 5.08E-07 | BGN, CD34, CFH, CLEC3B, COL6A1, DKK3, IL33, LAMB2, LEPR, LRRC32, LTBP4, MMP2, PLTP, PODXL, POSTN, PTGIS, PTRF, SLC2A1, STAB1, TEK, TM4SF1, VCAN                                                                  |
| DANG REGULATED BY MYC DN                                          | TF        | MYC      |            | Genes down-regulated by MYC [Gene ID=4609], according to the MYC Target Gene Database.                                                                                                                                                                                                                                                                                                                                                                                                                                                                         | MSigDBv3.0 CGP         | 243  | 15 | 2.2 | 7.7  | 7.14E-09 | 4.57E-05 | 5.72E-07 | AQP1, CAV1, CD151, COL1A2, COL3A1, COL5A1, CTGF, EDN1, FN1, FSTL1, HSPB1, PERP, PLS3, POSTN, SERPINE1                                                                                                            |
| MULLIGHAN MLL SIGNATURE 1 DN                                      | tumor     | other    |            | The 'MLL signature 1': genes down-regulated in pediatric AML (acute myeloid leukemia) with rearranged MLL [Gene ID=4297] compared to all AML cases with the intact gene.                                                                                                                                                                                                                                                                                                                                                                                       | MSigDBv3.0 CGP         | 243  | 15 | 2.2 | 7.7  | 7.14E-09 | 4.57E-05 | 5.72E-07 | AGRN, CAV1, FSCN1, HYAL2, ITGAV, LAMB2, MDK, MMP2, MYH10, PTRF, SERPINE2, SLC9A3R2, TIE1, TM4SF1, TNFRSF21                                                                                                       |

|                                                        |           |           |            |                                                                                                                                                                                                                                                                                                                                                                                                                                                                                           |                        |      |    |      |      |          |          |          |                                                                                                                                                                                                                                                                                              |
|--------------------------------------------------------|-----------|-----------|------------|-------------------------------------------------------------------------------------------------------------------------------------------------------------------------------------------------------------------------------------------------------------------------------------------------------------------------------------------------------------------------------------------------------------------------------------------------------------------------------------------|------------------------|------|----|------|------|----------|----------|----------|----------------------------------------------------------------------------------------------------------------------------------------------------------------------------------------------------------------------------------------------------------------------------------------------|
| LANDIS BREAST CANCER PROGRESSION DN                    | tumor     | breast    | aggressive | Genes down-regulated in preneoplastic mammary tissues and whose expression is maintained in tumors.                                                                                                                                                                                                                                                                                                                                                                                       | MSigDBv3.0 CGP         | 66   | 9  | 0.6  | 18   | 8.71E-09 | 5.58E-05 | 6.89E-07 | ANGPTL2, CD34, CLEC3B, COL3A1, COL5A1, CRIP1, FSTL1, GAS6, GJA1                                                                                                                                                                                                                              |
| TURASHVILI BREAST DUCTAL CARCINOMA VS DUCTAL NORMAL UP | tumor     | breast    | ductal     | Genes up-regulated in ductal carcinoma vs normal ductal breast cells.                                                                                                                                                                                                                                                                                                                                                                                                                     | MSigDBv3.0 CGP         | 47   | 8  | 0.4  | 23.2 | 9.77E-09 | 6.26E-05 | 7.64E-07 | COL1A2, COL3A1, COL5A2, FBN1, FN1, POSTN, SULF1, VCAN                                                                                                                                                                                                                                        |
| ORGAN DEVELOPMENT                                      | others    |           |            | Genes annotated by the GO term GO:0048513. Development of a tissue or tissues that work together to perform a specific function or functions. Development pertains to the process whose specific outcome is the progression of a structure over time, from its formation to the mature structure. Organs are commonly observed as visibly distinct structures, but may also exist as loosely associated clusters of cells that work together to perform a specific function or functions. | MSigDBv3.0 BP          | 565  | 22 | 5.2  | 4.9  | 1.11E-08 | 7.12E-05 | 8.58E-07 | ANXA2, CDH13, CLEC3B, COL1A2, COL4A2, COL5A2, CTGF, ELN, EMP1, ENG, EPHB4, FBN1, FOXC1, GATA4, GATA6, LAMB1, MDK, MEST, POSTN, ROBO4, STAB1, TIE1                                                                                                                                            |
| REACTOME NCAM SIGNALING FOR NEURITE OUT GROWTH         | signaling | NCAM      |            | Genes involved in NCAM signaling for neurite out-growth                                                                                                                                                                                                                                                                                                                                                                                                                                   | MSigDBv3.0 CP:REACTOME | 68   | 9  | 0.6  | 17.4 | 1.14E-08 | 7.31E-05 | 8.71E-07 | AGRN, COL1A2, COL3A1, COL4A2, COL5A1, COL5A2, COL6A1, COL6A2, SPTAN1                                                                                                                                                                                                                         |
| FARMER BREAST CANCER CLUSTER 5                         | tumor     | breast    | amplicon   | Cluster 5: selected 17q21_23 amplicon genes clustered together across breast cancer samples.                                                                                                                                                                                                                                                                                                                                                                                              | MSigDBv3.0 CGP         | 19   | 6  | 0.2  | 51.7 | 1.33E-08 | 8.52E-05 | 1.00E-06 | CDH11, COL1A2, COL3A1, COL5A1, COL5A2, FBN1                                                                                                                                                                                                                                                  |
| DAVICIONI TARGETS OF PAX FOXO1 FUSIONS UP              | tumor     | other     |            | Genes up-regulated in RD cells (embryonal rhabdomyosarcoma, ERMS) by expression of PAX3- or PAX7-FOXO1 [Gene ID=5077, 5081, 2308] fusions off retroviral vectors.                                                                                                                                                                                                                                                                                                                         | MSigDBv3.0 CGP         | 258  | 15 | 2.4  | 7.2  | 1.60E-08 | 0.000102 | 1.19E-06 | ADAMTS1, CAV1, CD9, COL5A1, COL6A2, CXCR7, DKK2, ECM1, EMP1, HEG1, LOXL2, MYOF, S100A10, SERPINE2, SULF1                                                                                                                                                                                     |
| TONKS TARGETS OF RUNX1 RUNX1T1 FUSION HSC UP           | others    |           |            | Genes up-regulated in normal hematopoietic progenitors by RUNX1-RUNX1T1 [Gene ID=861, 862] fusion.                                                                                                                                                                                                                                                                                                                                                                                        | MSigDBv3.0 CGP         | 186  | 13 | 1.7  | 8.7  | 1.72E-08 | 0.00011  | 1.26E-06 | ALDH1A2, ANXA2, COL3A1, ECM1, EMP1, EPS8, FSTL1, HSPB1, ID1, IL1RL1, RHOC, TM4SF1, VCAN                                                                                                                                                                                                      |
| GAUSSMANN MLL AF4 FUSION TARGETS F UP                  | tumor     | other     |            | Up-regulated genes from the set F (Fig. 5a): specific signature shared by cells expressing AF4-MLL [Gene ID=4299, 4297] alone and those expressing both AF4-MLL and MLL-AF4 fusion proteins.                                                                                                                                                                                                                                                                                              | MSigDBv3.0 CGP         | 130  | 11 | 1.2  | 10.6 | 3.13E-08 | 0.000201 | 2.29E-06 | BMPER, COL3A1, COL6A1, COL6A2, DKK3, ECM1, GAS6, S100A16, SCARA3, SYNPO, TEK                                                                                                                                                                                                                 |
| VART KSHV INFECTION ANGIOGENIC MARKERS DN              | tumor     | other     |            | Angiogenic markers down-regulated in lymph endothelial cells upon infection with KSHV (Kaposi's sarcoma herpes virus).                                                                                                                                                                                                                                                                                                                                                                    | MSigDBv3.0 CGP         | 134  | 11 | 1.2  | 10.3 | 4.30E-08 | 0.000275 | 3.10E-06 | CDH5, CFH, CTGF, EPHB4, ID1, MDK, MMP2, NOS3, SFRP5, STAB1, TIE1                                                                                                                                                                                                                             |
| COLLAGEN                                               | ECM       | component |            | Genes annotated by the GO term GO:0005581. Any of the various assemblies in which collagen chains form a left-handed triple helix; may assemble into higher order structures.                                                                                                                                                                                                                                                                                                             | MSigDBv3.0 CC          | 23   | 6  | 0.2  | 39.5 | 4.80E-08 | 0.000307 | 3.42E-06 | COL1A2, COL3A1, COL4A2, COL5A1, COL5A2, TNXB                                                                                                                                                                                                                                                 |
| TONKS TARGETS OF RUNX1 RUNX1T1 FUSION MONOCYTE UP      | others    |           |            | Genes up-regulated in monocytes by RUNX1-RUNX1T1 [Gene ID=861, 862] fusion.                                                                                                                                                                                                                                                                                                                                                                                                               | MSigDBv3.0 CGP         | 203  | 13 | 1.9  | 7.9  | 4.85E-08 | 0.00031  | 3.42E-06 | ALDH1A2, AQP1, COL1A2, EHD2, EPS8, FLNB, HSPB1, MYOF, PLS3, PLTP, PTRF, SPTAN1, TM4SF1                                                                                                                                                                                                       |
| NAKAMURA TUMOR ZONE PERIPHERAL VS CENTRAL UP           | tumor     | other     |            | Up-regulated genes in peripheral zone of human pancreatic cancer growing in the pancreas of nude mice compared to that of the tumor from the central zone.                                                                                                                                                                                                                                                                                                                                | MSigDBv3.0 CGP         | 283  | 15 | 2.6  | 6.5  | 5.45E-08 | 0.000349 | 3.76E-06 | ADAMTS1, ANO1, CAV1, CDH11, COL1A2, COL3A1, CRIM1, DKK3, EFEMP1, EMP1, FN1, LAMA4, MMP2, PODXL, VCAN                                                                                                                                                                                         |
| SENGUPTA NASOPHARYNGEAL CARCINOMA UP                   | tumor     | other     |            | Genes up-regulated in nasopharyngeal carcinoma relative to the normal tissue.                                                                                                                                                                                                                                                                                                                                                                                                             | MSigDBv3.0 CGP         | 283  | 15 | 2.6  | 6.5  | 5.45E-08 | 0.000349 | 3.76E-06 | CDH11, COL1A2, COL3A1, COL4A2, COL5A1, COL5A2, FBN1, FN1, GATA6, GJA1, ITGAV, LAMB1, POSTN, SULF1, VCAN                                                                                                                                                                                      |
| CAGGTG V5E12 Q6                                        | TF        | TCF3      |            | Genes with promoter regions [-2kb,2kb] around transcription start site containing the motif CAGGTG which matches annotation for TCF3: transcription factor 3 (E2A immunoglobulin enhancer binding factors E12/E47)                                                                                                                                                                                                                                                                        | MSigDBv3.0 TFT         | 1839 | 41 | 16.8 | 2.9  | 5.58E-08 | 0.000357 | 3.81E-06 | A4GALT, ALDH1A2, AQP1, BMP6, CD9, CDH13, COL1A2, CRIM1, DPYSL3, DSTN, EDN1, EFEMP1, ELN, EPS8, FLNB, FLNC, GPRCSB, HYAL2, ID1, ITGA6, ITGB4, KIF1C, LAMA4, LRIG1, LTBP3, MDK, MYH10, NRG1, PALM, PODXL, PTMS, PTRB, PVRL2, S100A16, SEMA3F, SERPINE2, SLCO2A1, SPTAN1, SULF1, TJP1, TNFRSF21 |
| ONDER CDH1 SIGNALING VIA CTNNB1                        | EMT       | gene      | CDH1       | Genes changed in HMLE cells (immortalized nontransformed mammary epithelium) after RNAi knockdown of both CDH1 [Gene ID=999] and CTNNB1 [Gene ID=1499], compared to the knockdown of CDH1 alone.                                                                                                                                                                                                                                                                                          | MSigDBv3.0 CGP         | 83   | 9  | 0.8  | 13.8 | 6.77E-08 | 0.000433 | 4.54E-06 | BGN, CDH11, COL1A2, FBN1, IGFBP7, PODXL, POSTN, SERPINE1, VCAN                                                                                                                                                                                                                               |
| MULTICELLULAR ORGANISMAL DEVELOPMENT                   | others    |           |            | Genes annotated by the GO term GO:0007275. The biological process whose specific outcome is the progression of an organism over time from an initial condition (e.g. a zygote or a young adult) to a later condition (e.g. a multicellular animal or an aged adult).                                                                                                                                                                                                                      | MSigDBv3.0 BP          | 1035 | 29 | 9.5  | 3.5  | 6.79E-08 | 0.000434 | 4.54E-06 | AGRN, ANGPTL2, ANXA2, CD9, CDH13, CLEC3B, COL1A2, COL4A2, COL5A2, CRIM1, CTGF, DPYSL3, ELN, EMP1, ENG, EPHB4, FBN1, FOXC1, GATA4, GATA6, LAMB1, LEPR, MDK, MEST, POSTN, ROBO4, STAB1, TIE1, VCAN                                                                                             |

|                                                 |           |              |            |                                                                                                                                                                                                                                                                                                                              |                |      |    |      |      |          |          |          |                                                                                                                                                                                                                                             |
|-------------------------------------------------|-----------|--------------|------------|------------------------------------------------------------------------------------------------------------------------------------------------------------------------------------------------------------------------------------------------------------------------------------------------------------------------------|----------------|------|----|------|------|----------|----------|----------|---------------------------------------------------------------------------------------------------------------------------------------------------------------------------------------------------------------------------------------------|
| SYSTEM DEVELOPMENT                              | others    |              |            | Genes annotated by the GO term GO:0048731. The process whose specific outcome is the progression of an organismal system over time, from its formation to the mature structure. A system is a regularly interacting or interdependent group of organs or tissues that work together to carry out a given biological process. | MSigDBv3.0 BP  | 853  | 26 | 7.8  | 3.8  | 6.90E-08 | 0.000441 | 4.57E-06 | AGRN, ANXA2, CD9, CDH13, CLEC3B, COL1A2, COL4A2, COL5A2, CRIM1, CTGF, DPYSL3, ELN, EMP1, ENG, EPHB4, FBN1, FOXC1, GATA4, GATA6, LAMB1, MDK, MEST, POSTN, ROBO4, STAB1, TIE1                                                                 |
| MAHAJAN RESPONSE TO IL1A DN                     | others    |              |            | Genes down-regulated in corneal fibroblasts after treatment with IL1A [Gene ID=3552].                                                                                                                                                                                                                                        | MSigDBv3.0 CGP | 61   | 8  | 0.6  | 17.1 | 8.20E-08 | 0.000524 | 5.38E-06 | CTGF, EPHB4, LAMA4, MYH10, PLS3, POSTN, SLC29A1, VCAN                                                                                                                                                                                       |
| CHIANG LIVER CANCER SUBCLASS CTNNB1 DN          | tumor     | other        |            | Top 200 marker genes down-regulated in the 'CTNNB1' subclass of hepatocellular carcinoma (HCC); characterized by activated CTNNB1 [Gene ID=1499].                                                                                                                                                                            | MSigDBv3.0 CGP | 143  | 11 | 1.3  | 9.6  | 8.41E-08 | 0.000537 | 5.45E-06 | ADAMTS1, BGN, COL1A2, COL3A1, COL5A1, EFEMP1, GATA6, PLTP, SERPINE1, SERPINE2, SULF1                                                                                                                                                        |
| WILCOX PRESPONSE TO ROGESTERONE DN              | signaling | progesterone |            | Genes down-regulated in primary cultures of ovarian surface epithelium cells exposed to progesterone [PubChem=5994] for 5 days.                                                                                                                                                                                              | MSigDBv3.0 CGP | 63   | 8  | 0.6  | 16.4 | 1.06E-07 | 0.000679 | 6.82E-06 | COL1A2, COL5A2, COL6A1, FAM38A, FN1, LOXL2, MMP2, PLEC                                                                                                                                                                                      |
| PLASMA MEMBRANE                                 | ECM       | adhesion     | membrane   | Genes annotated by the GO term GO:0005886. The membrane surrounding a cell that separates the cell from its external environment. It consists of a phospholipid bilayer and associated proteins.                                                                                                                             | MSigDBv3.0 CC  | 1390 | 34 | 12.7 | 3.1  | 1.14E-07 | 0.00073  | 7.27E-06 | ANXA2, AQP1, ATP1A1, BCAM, CAV1, CD151, CDC42BPB, CDH13, CDH5, CTGF, ENG, EPHB4, GJA1, GOLM1, IL1R1, ITGA9, ITGB4, LAMB1, LRRC32, MUC1, PALM, PODXL, PTPRB, PTRF, PVRL2, SCARB2, SLC29A1, SLC9A3R2, SLCO2A1, STAB1, TEK, TIE1, TJP1, TM4SF1 |
| CROMER TUMORIGENESIS UP                         | tumor     | other        |            | Tumorigenesis markers of head and neck squamous cell carcinoma (HNSCC): up-regulated in the 'early' tumors vs normal samples.                                                                                                                                                                                                | MSigDBv3.0 CGP | 44   | 7  | 0.4  | 21.3 | 1.38E-07 | 0.000881 | 8.69E-06 | COL1A2, COL3A1, COL4A2, COL5A2, FN1, POSTN, SERPINE1                                                                                                                                                                                        |
| RODWELL AGING KIDNEY UP                         | others    |              |            | Genes whose expression increases with age in normal kidney.                                                                                                                                                                                                                                                                  | MSigDBv3.0 CGP | 349  | 16 | 3.2  | 5.6  | 1.43E-07 | 0.000911 | 8.90E-06 | ANXA2, CDH11, COL1A2, COL3A1, COL5A1, CRIP1, DKK3, FBN1, FN1, FSCN1, MYOF, SERPINE2, STAB1, TXNDC5, VCAN, VIM                                                                                                                               |
| BROWNE HCMV INFECTION 18HR DN                   | others    |              |            | Genes down-regulated in primary fibroblast cell culture after infection with HCMV (AD169 strain) at 18 h time point that were not down-regulated at the previous time point, 16 h.                                                                                                                                           | MSigDBv3.0 CGP | 186  | 12 | 1.7  | 7.9  | 1.49E-07 | 0.000952 | 9.22E-06 | ANGPTL2, ANXA2, COL3A1, COL6A1, COL6A2, GAS6, ID1, LRRC32, PLXND1, PTGIS, PTRF, VCAN                                                                                                                                                        |
| DEBIASI APOPTOSIS BY REOVIRUS INFECTION DN      | others    |              |            | Genes down-regulated in HEK293 cells (embryonic kidney) at 6 h, 12 h or 24 h after infection with reovirus strain T3A (known as a strong inducer of apoptosis).                                                                                                                                                              | MSigDBv3.0 CGP | 226  | 13 | 2.1  | 7.1  | 1.70E-07 | 0.00108  | 1.03E-05 | AGRN, CD9, COL4A2, EPHB4, FLNC, FSCN1, ITGA6, LAMB2, PLEC, PODXL, PPP2R5B, SLC29A1, VCAN                                                                                                                                                    |
| SENESE HDAC1 AND HDAC2 TARGETS DN               | tumor     | other        |            | Genes down-regulated in U2OS cells (osteosarcoma) upon knockdown of both HDAC1 and HDAC2 [Gene ID=3065, 3066] by RNAi.                                                                                                                                                                                                       | MSigDBv3.0 CGP | 226  | 13 | 2.1  | 7.1  | 1.70E-07 | 0.00108  | 1.03E-05 | AQP1, CAV1, COL3A1, COL5A2, CXCR7, DSTN, FSTL1, IGFBP7, LAMB2, LTBP3, PLS3, SCARA3, SYNPO                                                                                                                                                   |
| module 23                                       | others    | metabolism   |            | Genes in module_23: Liver genes - Metabolism and xenobiotics                                                                                                                                                                                                                                                                 | MSigDBv3.0 CM  | 555  | 20 | 5.1  | 4.4  | 1.90E-07 | 0.00121  | 1.12E-05 | CD151, CD34, CFH, CLEC3B, COL6A1, DCHS1, ECM1, ELN, ENG, FBXL7, FN1, HSPG2, IFI27, LAMB2, MAOA, MUC1, PVRL2, SERPINE1, STAB1, TNXB                                                                                                          |
| VANHARANTA UTERINE FIBROID UP                   | others    |              |            | Genes up-regulated in uterine fibroids vs normal myometrium samples.                                                                                                                                                                                                                                                         | MSigDBv3.0 CGP | 46   | 7  | 0.4  | 20.2 | 1.90E-07 | 0.00121  | 1.12E-05 | COL3A1, COL4A2, COL5A2, FN1, LOXL2, MEST, SULF1                                                                                                                                                                                             |
| AMUNDSON POOR SURVIVAL AFTER GAMMA RADIATION 2G | tumor     | other        | survival   | Genes with basal expression distinguishing NCI-60 cell lines with poor survival after 2 Gy gamma irradiation.                                                                                                                                                                                                                | MSigDBv3.0 CGP | 155  | 11 | 1.4  | 8.8  | 1.91E-07 | 0.00122  | 1.12E-05 | AGRN, ANXA2, CDC42BPB, ITGAV, KIF1C, LAMB2, PLK2, PLS3, PTMS, S100A10, WWTR1                                                                                                                                                                |
| BROWNE HCMV INFECTION 48HR DN                   | others    |              |            | Genes down-regulated in primary fibroblast cell culture after infection with HCMV (AD169 strain) at 48 h time point that were not down-regulated at the previous time point, 24 h.                                                                                                                                           | MSigDBv3.0 CGP | 503  | 19 | 4.6  | 4.6  | 1.91E-07 | 0.00122  | 1.12E-05 | ANXA2, CD151, CFH, COL6A1, COL6A2, EFEMP1, FN1, GJA1, HEG1, HSPG2, LAMB1, LOXL2, MUC1, POSTN, PTRF, RNASE1, SLCO2A1, SULF1, TJP1                                                                                                            |
| RUIZ TNC TARGETS UP                             | tumor     | other        |            | Genes up-regulated in T98G cells (glioblastoma) by TNC [Gene ID=3371].                                                                                                                                                                                                                                                       | MSigDBv3.0 CGP | 156  | 11 | 1.4  | 8.7  | 2.04E-07 | 0.0013   | 1.18E-05 | CDH11, COL1A2, COL3A1, COL5A2, IGFBP7, IL1R1, LRIG1, LTBP3, MAGED1, PLK2, TM4SF1                                                                                                                                                            |
| LE SKI TARGETS UP                               | EMT       | breast cells | metastasis | Selected genes implicated in metastasis and epithelial-to-mesenchymal transition (EMT) which were up-regulated in MDA-MB-231 cells (breast cancer) upon knockdown of SKI [Gene ID=6497] by RNAi.                                                                                                                             | MSigDBv3.0 CGP | 16   | 5  | 0.1  | 50.6 | 2.45E-07 | 0.00156  | 1.41E-05 | ADAMTS1, CDH11, ITGB4, NRG1, SERPINE2                                                                                                                                                                                                       |
| RODRIGUES NTN1 TARGETS DN                       | tumor     | other        |            | Genes down-regulated in HCT8/S11 cells (colon cancer) engineered to stably express NTN1 [Gene ID=1630] off a plasmid vector.                                                                                                                                                                                                 | MSigDBv3.0 CGP | 159  | 11 | 1.5  | 8.5  | 2.48E-07 | 0.00158  | 1.41E-05 | BCAM, FLNB, FN1, FSCN1, HSPG2, ID1, ITGB4, MYOF, PVRL2, RBMS2, TNFRSF21                                                                                                                                                                     |
| URS ADIPOCYTE DIFFERENTIATION DN                | others    |              |            | Genes down-regulated in primary adipocytes compared to preadipocytes.                                                                                                                                                                                                                                                        | MSigDBv3.0 CGP | 30   | 6  | 0.3  | 28   | 2.68E-07 | 0.00171  | 1.51E-05 | COL3A1, COL4A2, COL5A1, COL6A1, FN1, MMP2                                                                                                                                                                                                   |
| MULLIGHAN MLL SIGNATURE 2 DN                    | tumor     | other        |            | The 'MLL signature 2': genes down-regulated in pediatric AML (acute myeloid leukemia) with rearranged MLL [Gene ID=4297] compared to the AML cases with intact MLL and NPM1 [Gene ID=4869].                                                                                                                                  | MSigDBv3.0 CGP | 279  | 14 | 2.6  | 6.1  | 3.00E-07 | 0.00192  | 1.68E-05 | AGRN, CD34, FSCN1, HYAL2, ITGAV, LAMB2, MDK, MMP2, PTRF, SERPINE2, SLC9A3R2, TIE1, TM4SF1, TNFRSF21                                                                                                                                         |
| BERTUCCI MEDULLARY VS DUCTAL BREAST CANCER DN   | tumor     | breast       | MBC vs DBD | Genes down-regulated in medullary breast cancer (MBC) relative to ductal breast cancer (DBD).                                                                                                                                                                                                                                | MSigDBv3.0 CGP | 165  | 11 | 1.5  | 8.2  | 3.60E-07 | 0.00229  | 2.00E-05 | ANO1, AQP1, BGN, CAV1, FLNC, FSTL1, HSPG2, LIMS2, MYH10, PERP, PTRF                                                                                                                                                                         |
| VART KSHV INFECTION ANGIOGENIC MARKERS UP       | others    |              |            | Angiogenic markers up-regulated in lymph endothelial cells upon infection with KSHV (Kaposi's sarcoma herpes virus).                                                                                                                                                                                                         | MSigDBv3.0 CGP | 166  | 11 | 1.5  | 8.1  | 3.82E-07 | 0.00244  | 2.10E-05 | ANGPTL2, COL4A2, ENG, HEG1, ITGAV, MMP2, NOS3, ROBO4, STAB1, TEK, TIE1                                                                                                                                                                      |

|                                                 |           |           |          |                                                                                                                                                                                                                                                          |                        |      |    |      |       |          |         |          |                                                                                                                                                                                                                                                            |
|-------------------------------------------------|-----------|-----------|----------|----------------------------------------------------------------------------------------------------------------------------------------------------------------------------------------------------------------------------------------------------------|------------------------|------|----|------|-------|----------|---------|----------|------------------------------------------------------------------------------------------------------------------------------------------------------------------------------------------------------------------------------------------------------------|
| BAELDE DIABETIC NEPHROPATHY UP module 513       | others    |           |          | Top 50 up-regulated genes in glomeruli from kidneys with diabetic nephropathy (type 2 diabetes mellitus).                                                                                                                                                | MSigDBv3.0 CGP         | 32   | 6  | 0.3  | 25.8  | 4.03E-07 | 0.00256 | 2.20E-05 | AQP1, CD34, CLEC3B, GAS6, HYAL2, TEK                                                                                                                                                                                                                       |
|                                                 | ECM       | component |          | Genes in module_513: Collagen and collagen binding proteins                                                                                                                                                                                              | MSigDBv3.0 CM          | 8    | 4  | 0.1  | 110.7 | 4.62E-07 | 0.00295 | 2.50E-05 | COL3A1, COL5A1, COL5A2, FN1                                                                                                                                                                                                                                |
| PLASMA MEMBRANE PART                            | ECM       | adhesion  | membrane | Genes annotated by the GO term GO:0044459. Any constituent part of the plasma membrane, the membrane surrounding a cell that separates the cell from its external environment. It consists of a phospholipid bilayer and associated proteins.            | MSigDBv3.0 CC          | 1138 | 29 | 10.4 | 3.2   | 4.97E-07 | 0.00317 | 2.67E-05 | AQP1, ATP1A1, BCAM, CAV1, CD151, CDC42BPB, CDH13, ENG, EPHB4, GJA1, GOLM1, IL1R1, ITGA9, ITGB4, LAMB1, LRRC32, MUC1, PALM, PODXL, PTPRB, PTRF, SCARB2, SLC29A1, SLCO2A1, STAB1, TEK, TIE1, TJP1, TM4SF1                                                    |
| COLIN PILOCYTIC ASTROCYTOMA VS GLOBLASTOMA UP   | tumor     | other     |          | Genes up-regulated in pilocytic astrocytoma compared to glioblastoma samples.                                                                                                                                                                            | MSigDBv3.0 CGP         | 34   | 6  | 0.3  | 24    | 5.88E-07 | 0.00375 | 3.13E-05 | ANGPTL2, DKK3, GPRC5B, PLA2G2A, SERPINE2, TNFRSF21                                                                                                                                                                                                         |
| BLALOCK ALZHEIMERS DISEASE UP                   | others    |           |          | Genes up-regulated in brain from patients with Alzheimer's disease.                                                                                                                                                                                      | MSigDBv3.0 CGP         | 1709 | 37 | 15.7 | 2.8   | 6.03E-07 | 0.00384 | 3.18E-05 | AGRN, ALDH1A2, ANGPTL2, ANXA2, AQP1, BCAM, BGN, COL1A2, COL6A2, CXCR7, DKK3, DPYSL3, EFEMP1, EMP1, EPS8, FBN1, FBXL7, FLNC, GJA1, GPRC5B, IL1R1, ITGA6, ITGB4, LAMA4, LTBP3, MMP2, MRC2, MUC1, NFE2L1, PLEC, PTGIS, PTRF, RBMS2, SEMA3F, TNXB, VCAN, WWTR1 |
| VERRECCHIA RESPONSE TO TGFB1 C2                 | signaling | TGFB      | ECM      | Cluster 2: ECM related genes up-regulated in dermal fibroblasts within 30 min after TGFB1 [Gene ID=7040] addition; reached a plateau after that.                                                                                                         | MSigDBv3.0 CGP         | 19   | 5  | 0.2  | 39.8  | 6.38E-07 | 0.00406 | 3.34E-05 | COL1A2, COL3A1, COL6A1, FN1, RHOC                                                                                                                                                                                                                          |
| HELLEBREKERS SILENCED DURING TUMOR ANGIOGENESIS | others    |           |          | Genes down-regulated in tumor-conditioned vs quiescent endothelial cells and up-regulated upon treatment with decitabine and TSA [PubChem=451668, 5562].                                                                                                 | MSigDBv3.0 CGP         | 56   | 7  | 0.5  | 16.1  | 7.61E-07 | 0.00484 | 3.95E-05 | COL4A2, COL6A1, DKK3, FBN1, IGFBP7, SERPINE2, VCAN                                                                                                                                                                                                         |
| BEGUM TARGETS OF PAX3 FOXO1 FUSION DN           | tumor     | other     |          | Genes down-regulated in SaOS-2 cells (osteosarcoma) upon expression of PAX3-FOXO1 [Gene ID=5077, 2308] fusion protein off an adenoviral vector.                                                                                                          | MSigDBv3.0 CGP         | 36   | 6  | 0.3  | 22.4  | 8.39E-07 | 0.00534 | 4.32E-05 | COL5A1, DKK3, FLNB, ID1, ITGB4, SERPINE1                                                                                                                                                                                                                   |
| BASEMENT MEMBRANE                               | ECM       | component |          | Genes annotated by the GO term GO:0005604. A thin layer of dense material found in various animal tissues interposed between the cells and the adjacent connective tissue. It consists of the basal lamina plus an associated layer of reticulin fibers. | MSigDBv3.0 CC          | 37   | 6  | 0.3  | 21.7  | 9.94E-07 | 0.00633 | 5.08E-05 | AGRN, COL4A2, FBN1, LAMA4, LAMB1, LAMB2                                                                                                                                                                                                                    |
| JAATINEN HEMATOPOIETIC STEM CELL UP             | others    | stem cell | CD133    | Genes up-regulated in CD133+ [Gene ID=8842] cells (hematopoietic stem cells, HSC) compared to the CD133- cells.                                                                                                                                          | MSigDBv3.0 CGP         | 310  | 14 | 2.8  | 5.5   | 1.06E-06 | 0.00676 | 5.39E-05 | CD34, CFH, COL5A1, CRIM1, DPYSL3, EMP1, FGD5, HSPB1, IGFBP7, ITGA9, MEST, MMP28, PLS3, TNFRSF21                                                                                                                                                            |
| TGANTCA V\$AP1 C                                | TF        | JUN       |          | Genes with promoter regions [-2kb,2kb] around transcription start site containing the motif TGANTCA which matches annotation for JUN: jun oncogene                                                                                                       | MSigDBv3.0 TFT         | 862  | 24 | 7.9  | 3.4   | 1.18E-06 | 0.00749 | 5.92E-05 | ADAM15, CD151, CDH5, COL5A2, DSTN, ECM1, EMP1, FLNC, GJA1, HSPG2, IL1R1, ITGB4, LPHN2, LTBP3, MAGED1, MMRN2, NRG1, PERP, PTMS, PTRF, RHOC, S100A10, SYNPO, TNXB                                                                                            |
| BROWNE HCMV INFECTION 24HR DN                   | others    |           |          | Genes down-regulated in primary fibroblast cell culture after infection with HCMV (AD169 strain) at 24 h time point that were not down-regulated at the previous time point, 20 h.                                                                       | MSigDBv3.0 CGP         | 150  | 10 | 1.4  | 8.1   | 1.24E-06 | 0.0079  | 6.20E-05 | CAV1, CD59, CDH13, COL5A2, CRIM1, FBN1, GAS6, LAMA4, MEST, S100A10                                                                                                                                                                                         |
| KOKKINAKIS METHIONINE DEPRIVATION 96HR UP       | tumor     | other     |          | Genes up-regulated in MEWO cells (melanoma) after 96 h of methionine [PubChem=876] deprivation.                                                                                                                                                          | MSigDBv3.0 CGP         | 119  | 9  | 1.1  | 9.3   | 1.50E-06 | 0.00956 | 7.45E-05 | BGN, CAV1, GJA1, HSPB1, IGFBP7, IL1R1, MMP2, PERP, SPTAN1                                                                                                                                                                                                  |
| module 291                                      | tumor     | other     |          | Genes in module_291: B-cell malignancies expression clusters                                                                                                                                                                                             | MSigDBv3.0 CM          | 62   | 7  | 0.6  | 14.3  | 1.54E-06 | 0.0098  | 7.58E-05 | CDH11, COL1A2, FAM38A, FN1, IFI27, NRG1, POSTN                                                                                                                                                                                                             |
| GGGTGRRR V\$PAX4 03                             | TF        | others    |          | Genes with promoter regions [-2kb,2kb] around transcription start site containing the motif GGGTGRRR which matches annotation for PAX4: paired box gene 4                                                                                                | MSigDBv3.0 TFT         | 1005 | 26 | 9.2  | 3.2   | 1.59E-06 | 0.0101  | 7.76E-05 | CRIM1, ELN, FLNC, GATA6, HSPG2, HYAL2, ITGA6, KIF1C, LAMB2, MAGED1, MMP28, NFE2L1, NOS3, NRG1, NTN1, PLS3, PPP2R5B, PTMS, PTRF, RBMS2, S100A10, S100A16, SERPINE1, SPTAN1, TNXB, VIM                                                                       |
| REACTOME SIGNALING BY PDGF                      | signaling | PDGF      |          | Genes involved in Signaling by PDGF                                                                                                                                                                                                                      | MSigDBv3.0 CP:REACTOME | 63   | 7  | 0.6  | 14.1  | 1.72E-06 | 0.0109  | 8.31E-05 | COL1A2, COL3A1, COL4A2, COL5A1, COL5A2, COL6A1, COL6A2                                                                                                                                                                                                     |
| SENESE HDAC2 TARGETS DN                         | tumor     | other     |          | Genes down-regulated in U2OS cells (osteosarcoma) upon knockdown of HDAC2 [Gene ID=3066] by RNAi.                                                                                                                                                        | MSigDBv3.0 CGP         | 121  | 9  | 1.1  | 9.1   | 1.73E-06 | 0.011   | 8.31E-05 | AQP1, BCAM, CDH11, COL3A1, COL5A2, CXCR7, EDN1, IGFBP7, SCARA3                                                                                                                                                                                             |

|                                                         |          |            |                  |                                                                                                                                                                                                                                                            |                   |      |    |      |      |          |        |          |                                                                                                                                                                                                                                                                                |
|---------------------------------------------------------|----------|------------|------------------|------------------------------------------------------------------------------------------------------------------------------------------------------------------------------------------------------------------------------------------------------------|-------------------|------|----|------|------|----------|--------|----------|--------------------------------------------------------------------------------------------------------------------------------------------------------------------------------------------------------------------------------------------------------------------------------|
| MEMBRANE                                                | ECM      | adhesion   | membrane         | Genes annotated by the GO term GO:0016020. Double layer of lipid molecules that encloses all cells, and, in eukaryotes, many organelles; may be a single or double lipid bilayer; also includes associated proteins.                                       | MSigDBv3.0<br>CC  | 1939 | 39 | 17.8 | 2.6  | 1.77E-06 | 0.0112 | 8.44E-05 | ANXA2, AQP1, ATP1A1, BCAM, CAV1, CD151, CDC42BPB, CDH13, CDH5, CRIM1, CTGF, EMP1, ENG, EPHB4, GJA1, GOLM1, GPR116, IL1R1, ITGA9, ITGB4, LAMB1, LPHN2, LRRC32, MUC1, PALM, PODXL, PTPRB, PTRF, PVRL2, ROBO4, SCARB2, SLC29A1, SLC9A3R2, SLCO2A1, STAB1, TEK, TIE1, TJP1, TM4SF1 |
| module 33                                               | others   |            |                  | Genes in module_33: Immune/stress response genes                                                                                                                                                                                                           | MSigDBv3.0<br>CM  | 372  | 15 | 3.4  | 4.9  | 1.78E-06 | 0.0113 | 8.45E-05 | CD9, COL6A1, ELN, EMP1, FBLN2, GJA1, HSPG2, IL1R1, ITGA6, MAOA, MEST, MUC1, NRG1, PTMS, STAB1                                                                                                                                                                                  |
| ANATOMICAL STRUCTURE MORPHOGENESIS                      | others   |            |                  | Genes annotated by the GO term GO:0009653. The process by which anatomical structures are generated and organized. Morphogenesis pertains to the creation of form.                                                                                         | MSigDBv3.0<br>BP  | 373  | 15 | 3.4  | 4.9  | 1.84E-06 | 0.0117 | 8.67E-05 | CD9, CDC42BPB, CDH13, COL4A2, DKK3, ELN, ENG, EPHB4, FGD5, FOXC1, LAMB1, NFE2L1, ROBO4, SFRP5, STAB1                                                                                                                                                                           |
| module 174                                              | others   |            |                  | Genes in module_174                                                                                                                                                                                                                                        | MSigDBv3.0<br>CM  | 91   | 8  | 0.8  | 10.9 | 1.88E-06 | 0.0119 | 8.75E-05 | CDH11, COL1A2, ENG, FAM38A, FN1, IFI27, NRG1, POSTN                                                                                                                                                                                                                            |
| CASTELLANO NRAS TARGETS UP                              | others   |            |                  | Genes up-regulated in MEF cells (embryonic fibroblast) isolated from NRAS [Gene ID=4893] knockout mice.                                                                                                                                                    | MSigDBv3.0<br>CGP | 65   | 7  | 0.6  | 13.6 | 2.13E-06 | 0.0135 | 9.88E-05 | CFH, CRIP2, GJA1, MEST, PERP, PLTP, SERPINE2                                                                                                                                                                                                                                   |
| EXTRACELLULAR SPACE                                     | ECM      | component  |                  | Genes annotated by the GO term GO:0005615. That part of a multicellular organism outside the cells proper, usually taken to be outside the plasma membranes, and occupied by fluid.                                                                        | MSigDBv3.0<br>CC  | 239  | 12 | 2.2  | 6.1  | 2.16E-06 | 0.0137 | 9.93E-05 | ANGPTL2, CDH13, CFH, DKK2, DKK3, EDN1, FBN1, FSTL1, LOXL2, MMP2, SEMA3F, SFRP5                                                                                                                                                                                                 |
| YAGI AML WITH T 8 21 TRANSLOCATION                      | tumor    | other      |                  | Genes specifically expressed in samples from patients with pediatric AML (acute myeloid leukemia ) bearing t(8;21) translocation.                                                                                                                          | MSigDBv3.0<br>CGP | 378  | 15 | 3.5  | 4.8  | 2.17E-06 | 0.0138 | 9.93E-05 | AGRN, BCAM, CAV1, CD34, CXCR7, FSCN1, ITGB4, MDK, PALM, PLTP, PLXND1, RNASE1, SERPINE2, TEK, TNFRSF21                                                                                                                                                                          |
| LINDGREN BLADDER CANCER HIGH RECURRENCE                 | tumor    | other      |                  | Genes up-regulated among the high recurrence rate urothelial cell carcinoma (UCC) tumors.                                                                                                                                                                  | MSigDBv3.0<br>CGP | 43   | 6  | 0.4  | 18.1 | 2.49E-06 | 0.0158 | 0.000113 | COL1A2, COL4A2, COL5A2, CRIP1, LAMA4, PTMS                                                                                                                                                                                                                                     |
| MARCHINI TRABECTEDIN RESISTANCE DN                      | tumor    | resistance | trabectedin      | Genes down-regulated in chondrosarcoma and ovarian carcinoma cell lines which developed resistance to trabectedin [PubChem=3199].                                                                                                                          | MSigDBv3.0<br>CGP | 45   | 6  | 0.4  | 17.2 | 3.28E-06 | 0.0208 | 0.000148 | BCAM, CDH13, COL3A1, COL4A2, FSTL1, IGFBP7                                                                                                                                                                                                                                     |
| module 241                                              | tumor    | other      |                  | Genes in module_241                                                                                                                                                                                                                                        | MSigDBv3.0<br>CM  | 70   | 7  | 0.6  | 12.5 | 3.53E-06 | 0.0224 | 0.000158 | CDH11, COL1A2, FAM38A, FN1, IFI27, NRG1, POSTN                                                                                                                                                                                                                                 |
| module 79                                               | others   |            |                  | Genes in module_79                                                                                                                                                                                                                                         | MSigDBv3.0<br>CM  | 99   | 8  | 0.9  | 9.9  | 3.55E-06 | 0.0225 | 0.000158 | CD151, CDH13, FN1, GAS6, GATA6, IL1R1, MMP2, VIM                                                                                                                                                                                                                               |
| KOKKINAKIS METHIONINE DEPRIVATION 48HR UP               | tumor    | other      |                  | Genes up-regulated in MEWO cells (melanoma) after 48h of methionine [PubChem=876] deprivation.                                                                                                                                                             | MSigDBv3.0<br>CGP | 134  | 9  | 1.2  | 8.2  | 4.03E-06 | 0.0256 | 0.000178 | BGN, CAV1, GJA1, HSPB1, IGFBP7, IL1R1, MMP2, PERP, SPTAN1                                                                                                                                                                                                                      |
| EXTRACELLULAR MATRIX STRUCTURAL CONSTITUENT             | ECM      | component  |                  | Genes annotated by the GO term GO:0005201. The action of a molecule that contributes to the structural integrity of the extracellular matrix.                                                                                                              | MSigDBv3.0<br>MF  | 27   | 5  | 0.2  | 25.3 | 4.17E-06 | 0.0265 | 0.000183 | COL4A2, FBLN2, FBN1, LAMA4, LAMB1                                                                                                                                                                                                                                              |
| MEMBRANE PART                                           | ECM      | adhesion   | membrane         | Genes annotated by the GO term GO:0044425. Any constituent part of a membrane, a double layer of lipid molecules that encloses all cells, and, in eukaryotes, many organelles; may be a single or double lipid bilayer; also includes associated proteins. | MSigDBv3.0<br>CC  | 1630 | 34 | 14.9 | 2.6  | 4.33E-06 | 0.0275 | 0.000189 | AQP1, ATP1A1, BCAM, CAV1, CD151, CDC42BPB, CDH13, CRIM1, EMP1, ENG, EPHB4, GJA1, GOLM1, GPR116, IL1R1, ITGA9, ITGB4, LAMB1, LPHN2, LRRC32, MUC1, PALM, PODXL, PTPRB, PTRF, ROBO4, SCARB2, SLC29A1, SLCO2A1, STAB1, TEK, TIE1, TJP1, TM4SF1                                     |
| CAIRO HEPATOBLASTOMA CLASSES DN                         | tumor    | other      |                  | Genes down-regulated in robust Cluster 2 (rC2) of hepatoblastoma samples compared to those in the robust Cluster 1 (rC1).                                                                                                                                  | MSigDBv3.0<br>CGP | 213  | 11 | 2    | 6.2  | 4.42E-06 | 0.028  | 0.000191 | CD59, DKK3, ECM1, ENG, GAS6, IL1R1, LIMS2, MMRN2, PTPRB, SYNPO, TJP1                                                                                                                                                                                                           |
| LOPEZ MBD TARGETS                                       | tumor    | other      |                  | Genes up-regulated in HeLa cells (cervical cancer) after simultaneous knockdown of all three MBD (methyl-CpG binding domain) proteins MeCP2, MBD1 and MBD2 [Gene ID=4204, 4152, 8932] by RNAi.                                                             | MSigDBv3.0<br>CGP | 868  | 23 | 8    | 3.2  | 4.58E-06 | 0.029  | 0.000197 | CDH5, COL4A2, CRIM1, DCTN6, ECM1, EHD2, ENG, EPHB4, FAM38A, FN1, HSPG2, IL1R1, ITFG3, LTBP3, MMP2, MMRN2, NPDC1, PSMD9, RHOC, S100A10, SCARB2, SERPINE1, SPTAN1                                                                                                                |
| ACACTGG,MIR-199A,MIR-199B                               | microRNA |            |                  | Targets of MicroRNA ACACTGG,MIR-199A,MIR-199B                                                                                                                                                                                                              | MSigDBv3.0<br>MIR | 137  | 9  | 1.3  | 8    | 4.84E-06 | 0.0307 | 0.000206 | BCAM, CAV1, CTGF, HMCN1, NFE2L1, PLXND1, PODXL, PVRL2, SULF1                                                                                                                                                                                                                   |
| SIMBULAN UV RESPONSE IMMORTALIZED DN                    | others   |            |                  | Genes down-regulated in response to UVB radiation in HFK cells (keratinocytes) immortalized by overexpression of HPV E6 and E7 viral oncogenes.                                                                                                            | MSigDBv3.0<br>CGP | 28   | 5  | 0.3  | 24.2 | 5.04E-06 | 0.0319 | 0.000214 | EMP1, FN1, ID1, ITGA6, PLEC                                                                                                                                                                                                                                                    |
| GAUSSMANN MLL AF4 FUSION TARGETS E UP                   | tumor    | other      |                  | Up-regulated genes from the set E (Fig. 5a): specific signature shared by cells expressing either MLL-AF4 [Gene ID=4297, 4299] or AF4-MLL fusion proteins alone, and those expressing both fusion proteins.                                                | MSigDBv3.0<br>CGP | 74   | 7  | 0.7  | 11.7 | 5.14E-06 | 0.0326 | 0.000215 | CD34, CDH11, CRIP1, NTN1, POSTN, S100A10, SULF1                                                                                                                                                                                                                                |
| TURASHVILI BREAST DUCTAL CARCINOMA VS LOBULAR NORMAL UP | tumor    | breast     | ductal vs normal | Genes up-regulated in ductal carcinoma vs normal lobular breast cells.                                                                                                                                                                                     | MSigDBv3.0<br>CGP | 74   | 7  | 0.7  | 11.7 | 5.14E-06 | 0.0326 | 0.000215 | COL1A2, COL3A1, COL5A2, FBN1, FN1, SULF1, VCAN                                                                                                                                                                                                                                 |



|                                                      |              |                        |                               |                                                                                                                                                                                                                                                                                                                                                                                                                                                                          |                |      |    |      |      |          |        |          |                                                                                                                                                                                                                                               |
|------------------------------------------------------|--------------|------------------------|-------------------------------|--------------------------------------------------------------------------------------------------------------------------------------------------------------------------------------------------------------------------------------------------------------------------------------------------------------------------------------------------------------------------------------------------------------------------------------------------------------------------|----------------|------|----|------|------|----------|--------|----------|-----------------------------------------------------------------------------------------------------------------------------------------------------------------------------------------------------------------------------------------------|
| ZHANG PROLIFERATING VS QUIESCENT                     | others       |                        |                               | Genes up-regulated in HDMEC cells (microvascular endothelium): proliferating vs quiescent cells.                                                                                                                                                                                                                                                                                                                                                                         | MSigDBv3.0 CGP | 49   | 6  | 0.4  | 15.6 | 5.46E-06 | 0.0346 | 0.000227 | CTGF, HSPB1, ITGA6, ITGAV, TEK, TIE1                                                                                                                                                                                                          |
| RODRIGUES THYROID CARCINOMA POORLY DIFFERENTIATED DN | tumor        | other                  |                               | Genes down-regulated in poorly differentiated thyroid carcinoma (PDTC) compared to normal thyroid tissue.                                                                                                                                                                                                                                                                                                                                                                | MSigDBv3.0 CGP | 752  | 21 | 6.9  | 3.4  | 5.56E-06 | 0.0352 | 0.00023  | ATP1A1, BCAM, CD59, COL3A1, COL4A2, CTGF, DPYSL3, EMP1, FBN1, FLNB, GJA1, LAMA4, LEPR, LRIG1, LTBP3, MMRN2, PODXL, PTPRB, SCARB2, SLC29A1, VIM                                                                                                |
| GGGAGRR V\$MAZ Q6                                    | TF           | MYC                    | MAZ:MYC                       | Genes with promoter regions [-2kb,2kb] around transcription start site containing the motif GGGAGRR which matches annotation for MAZ: MYC-associated zinc finger protein (purine-binding transcription factor)                                                                                                                                                                                                                                                           | MSigDBv3.0 TFT | 1729 | 35 | 15.8 | 2.5  | 5.91E-06 | 0.0375 | 0.000243 | ADAM15, ADAMTS1, ALDH1A2, AQP1, ATP1A1, CD151, COL1A2, COL5A2, CTGF, DKK2, DOCK6, FBN1, FLNC, HSPB1, HSPG2, ID1, KIF1C, MAGED1, MDK, MMP2, MRC2, NPDC1, NRG1, PLS3, POSTN, PTMS, PTRF, PVRL2, RHOC, ROBO4, S100A16, SLCO2A1, STAB1, TNXB, VIM |
| CYTOPLASM ORGANIZATION AND BIOGENESIS                | others       |                        |                               | Genes annotated by the GO term GO:0007028. A process that is carried out at the cellular level which results in the formation, arrangement of constituent parts, or disassembly of the cytoplasm and its components.                                                                                                                                                                                                                                                     | MSigDBv3.0 BP  | 14   | 4  | 0.1  | 44.3 | 6.33E-06 | 0.0401 | 0.000255 | CD9, GJA1, ITGA6, TJP1                                                                                                                                                                                                                        |
| MAHADEVAN GIST MORPHOLOGICAL SWITCH                  | tumor        | resistance             | imatinib-morphological change | Genes up-regulated in the GIST (gastrointestinal stromal tumor) cell line resistant to imatinib [PubChem=5291] that may correlate with the morphological switch in these cells.                                                                                                                                                                                                                                                                                          | MSigDBv3.0 CGP | 14   | 4  | 0.1  | 44.3 | 6.33E-06 | 0.0401 | 0.000255 | CDH13, CTGF, FSCN1, MMP2                                                                                                                                                                                                                      |
| ZIRN TRETINOIN RESPONSE UP                           | tumor        | other                  |                               | Genes up-regulated in MS427 cells (Wilms tumor with normal WT1 [Gene ID=7490]) after treatment with 10 microM tretinoin (ATRA) [PubChem=5538] for 24 h.                                                                                                                                                                                                                                                                                                                  | MSigDBv3.0 CGP | 14   | 4  | 0.1  | 44.3 | 6.33E-06 | 0.0401 | 0.000255 | CTGF, LAMA4, PLK2, SLCO2A1                                                                                                                                                                                                                    |
| FRIDMAN SENESENCE UP                                 | others       | senescent              |                               | Genes up-regulated in senescent cells.                                                                                                                                                                                                                                                                                                                                                                                                                                   | MSigDBv3.0 CGP | 77   | 7  | 0.7  | 11.2 | 6.72E-06 | 0.0425 | 0.000269 | COL1A2, CTGF, FN1, IGFBP7, NRG1, SERPINE1, VIM                                                                                                                                                                                                |
| INTEGRAL TO MEMBRANE                                 | ECM          | adhesion               | membrane                      | Genes annotated by the GO term GO:0016021. Penetrating at least one phospholipid bilayer of a membrane. May also refer to the state of being buried in the bilayer with no exposure outside the bilayer. When used to describe a protein, indicates that all or part of the peptide sequence is embedded in the membrane.                                                                                                                                                | MSigDBv3.0 CC  | 1300 | 29 | 11.9 | 2.8  | 7.01E-06 | 0.0444 | 0.000279 | AQP1, ATP1A1, BCAM, CAV1, CD151, CRIM1, EMP1, ENG, EPHB4, GJA1, GOLM1, GPR116, IL1R1, ITGA9, ITGB4, LPHN2, LRRC32, MUC1, PALM, PODXL, PTPRB, ROBO4, SCARB2, SLC29A1, SLCO2A1, STAB1, TEK, TIE1, TM4SF1                                        |
| RIGGI EWING SARCOMA PROGENITOR DN                    | others       | mesenchymal stem cells |                               | Genes down-regulated in mesenchymal stem cells (MSC) engineered to express EWS-FLI1 [Gene ID=2130, 2321] fusion protein.                                                                                                                                                                                                                                                                                                                                                 | MSigDBv3.0 CGP | 182  | 10 | 1.7  | 6.6  | 7.06E-06 | 0.0446 | 0.000279 | COL6A2, DPYSL3, ECM1, GATA6, HEG1, IL1R1, LAMA4, PTGIS, SCARA3, VCAN                                                                                                                                                                          |
| module 524                                           | cytoskeleton |                        |                               | Genes in module_524: Actin cytoskeleton binding                                                                                                                                                                                                                                                                                                                                                                                                                          | MSigDBv3.0 CM  | 30   | 5  | 0.3  | 22.2 | 7.20E-06 | 0.0455 | 0.000281 | DSTN, FLNB, FLNC, PLS3, SPTAN1                                                                                                                                                                                                                |
| SIMBULAN UV RESPONSE NORMAL DN                       | others       |                        |                               | Genes down-regulated in HFK cells (primary keratinocytes) in response to UVB irradiation.                                                                                                                                                                                                                                                                                                                                                                                | MSigDBv3.0 CGP | 30   | 5  | 0.3  | 22.2 | 7.20E-06 | 0.0455 | 0.000281 | EMP1, ID1, ITGA6, ITGB4, PLEC                                                                                                                                                                                                                 |
| HELLER HDAC TARGETS UP                               | tumor        | other                  |                               | Genes up-regulated in at least one of three multiple myeloma (MM) cell lines by TSA [PubChem=5562].                                                                                                                                                                                                                                                                                                                                                                      | MSigDBv3.0 CGP | 269  | 12 | 2.5  | 5.4  | 7.26E-06 | 0.0459 | 0.000281 | ADAM15, AGRN, CD9, CFH, CRIP2, DOCK6, FN1, FSCN1, GATA4, ITGA6, MAOA, PLK2                                                                                                                                                                    |
| ORGAN MORPHOGENESIS                                  | others       |                        |                               | Genes annotated by the GO term GO:0009887. Morphogenesis of an organ. An organ is defined as a tissue or set of tissues that work together to perform a specific function or functions. Morphogenesis is the process by which anatomical structures are generated and organized. Organs are commonly observed as visibly distinct structures, but may also exist as loosely associated clusters of cells that work together to perform a specific function or functions. | MSigDBv3.0 BP  | 144  | 9  | 1.3  | 7.6  | 7.27E-06 | 0.0459 | 0.000281 | CDH13, COL4A2, ELN, ENG, EPHB4, FOXC1, LAMB1, ROBO4, STAB1                                                                                                                                                                                    |
| INTEGRAL TO PLASMA MEMBRANE                          | ECM          | adhesion               | receptor                      | Genes annotated by the GO term GO:0005887. Penetrating at least one phospholipid bilayer of a plasma membrane. May also refer to the state of being buried in the bilayer with no exposure outside the bilayer.                                                                                                                                                                                                                                                          | MSigDBv3.0 CC  | 961  | 24 | 8.8  | 3.1  | 7.61E-06 | 0.0481 | 0.000292 | AQP1, ATP1A1, BCAM, CAV1, CD151, ENG, EPHB4, GJA1, GOLM1, IL1R1, ITGA9, ITGB4, LRRC32, MUC1, PALM, PODXL, PTPRB, SCARB2, SLC29A1, SLCO2A1, STAB1, TEK, TIE1, TM4SF1                                                                           |
| RUTELLA RESPONSE TO HGF UP                           | others       |                        |                               | Genes up-regulated in peripheral blood monocytes by HGF [Gene ID=3082].                                                                                                                                                                                                                                                                                                                                                                                                  | MSigDBv3.0 CGP | 425  | 15 | 3.9  | 4.2  | 8.97E-06 | 0.0567 | 0.000342 | ANXA2, CD59, CD9, CRIM1, EMP1, FSCN1, HSPB1, IL1R1, MAOA, MMP2, MYOF, PLTP, PVRL2, SCARB2, SERPINE1                                                                                                                                           |
| INTRINSIC TO MEMBRANE                                | ECM          | adhesion               | membrane                      | Genes annotated by the GO term GO:0031224. Located in a membrane such that some covalently attached portion of the gene product, for example part of a peptide sequence or some other covalently attached moiety such as a GPI anchor, spans or is embedded in one or both leaflets of the membrane.                                                                                                                                                                     | MSigDBv3.0 CC  | 1318 | 29 | 12.1 | 2.7  | 9.12E-06 | 0.0576 | 0.000346 | AQP1, ATP1A1, BCAM, CAV1, CD151, CRIM1, EMP1, ENG, EPHB4, GJA1, GOLM1, GPR116, IL1R1, ITGA9, ITGB4, LPHN2, LRRC32, MUC1, PALM, PODXL, PTPRB, ROBO4, SCARB2, SLC29A1, SLCO2A1, STAB1, TEK, TIE1, TM4SF1                                        |
| NUYTEN EZH2 TARGETS UP                               | tumor        | other                  | EZH2                          | Genes up-regulated in PC3 cells (prostate cancer) after knockdown of EZH2 [Gene ID=2146] by RNAi.                                                                                                                                                                                                                                                                                                                                                                        | MSigDBv3.0 CGP | 972  | 24 | 8.9  | 3    | 9.20E-06 | 0.0581 | 0.000347 | AGRN, ANXA2, CD59, CDH11, COL5A1, COL6A1, CTGF, EDN1, EFEMP1, FN1, GAS6, GATA6, GJA1, GPRC5B, MEST, NFE2L1, PLK2, PODXL, PPP2R5B, RHOC, ROBO4, SCARB2, SERPINE1, SERPINE2                                                                     |

|                                                     |              |           |            |                                                                                                                                                                                                                                                                                                               |                                         |     |    |     |      |          |        |          |                                                                                                                                                                     |
|-----------------------------------------------------|--------------|-----------|------------|---------------------------------------------------------------------------------------------------------------------------------------------------------------------------------------------------------------------------------------------------------------------------------------------------------------|-----------------------------------------|-----|----|-----|------|----------|--------|----------|---------------------------------------------------------------------------------------------------------------------------------------------------------------------|
| V\$ETS1 B                                           | TF           | ETS1      |            | Genes with promoter regions [-2kb,2kb] around transcription start site containing the motif RCAGGAAGTGNNNTNS which matches annotation for ETS1: TFT v-ets erythroblastosis virus E26 oncogene homolog 1 (avian)                                                                                               | MSigDBv3.0                              | 188 | 10 | 1.7 | 6.4  | 9.39E-06 | 0.0593 | 0.000352 | ADAM15, DKK2, FLNC, HYAL2, KIF1C, MAGED1, MYH10, NRG1, RBMS2, S100A10                                                                                               |
| LAIHO COLORECTAL CANCER SERRATED UP                 | tumor        | other     |            | Genes up-regulated in serrated vs conventional colorectal carcinoma (CRC) samples.                                                                                                                                                                                                                            | MSigDBv3.0 CGP                          | 113 | 8  | 1   | 8.6  | 9.52E-06 | 0.0601 | 0.000355 | ANXA2, CAV1, CTGF, EMP1, IFI27, LAMB1, POSTN, TM4SF1                                                                                                                |
| INTRINSIC TO PLASMA MEMBRANE                        | ECM          | adhesion  | receptor   | Genes annotated by the GO term GO:0031226. Located in the plasma membrane such that some covalently attached portion of the gene product, for example part of a peptide sequence or some other covalently attached moiety such as a GPI anchor, spans or is embedded in one or both leaflets of the membrane. | MSigDBv3.0 CC                           | 975 | 24 | 8.9 | 3    | 9.68E-06 | 0.0611 | 0.000358 | AQP1, ATP1A1, BCAM, CAV1, CD151, ENG, EPHB4, GJA1, GOLM1, IL1R1, ITGA9, ITGB4, LRRC32, MUC1, PALM, PODXL, PTPRB, SCARB2, SLC29A1, SLCO2A1, STAB1, TEK, TIE1, TM4SF1 |
| MINN LUNG UP                                        | tumor        | breast    | metastasis | minn nature 2005 up in breast cancer likely to metastasize to lung                                                                                                                                                                                                                                            | minn nature 2005 supplement ary table 2 | 54  | 6  | 0.5 | 14   | 9.71E-06 | 0.0613 | 0.000358 | COL6A1, EMP1, FSCN1, ID1, MMP2, SERPINE2                                                                                                                            |
| ACTIN FILAMENT BASED PROCESS                        | cytoskeleton |           |            | Genes annotated by the GO term GO:0030029. Any cellular process that depends upon or alters the actin cytoskeleton, that part of the cytoskeleton comprising actin filaments and their associated proteins.                                                                                                   | MSigDBv3.0 BP                           | 114 | 8  | 1   | 8.5  | 1.02E-05 | 0.0641 | 0.000372 | CDC42BPB, DSTN, FGD5, FLNB, FSCN1, MYH10, RHOJ, TNXB                                                                                                                |
| HADDAD T LYMPHOCYTE AND NK PROGENITOR UP            | others       |           |            | Genes up-regulated in hematopoietic progenitor cells (HPC) of T lymphocyte and NK (natural killer) lineage.                                                                                                                                                                                                   | MSigDBv3.0 CGP                          | 83  | 7  | 0.8 | 10.3 | 1.11E-05 | 0.0699 | 0.000404 | CFH, COL5A1, HSPB1, LRIG1, MDK, MYH10, PTRF                                                                                                                         |
| DASU IL6 SIGNALING SCAR DN                          | signaling    | IL6       |            | Genes down-regulated in hypertrophic scar fibroblasts in response to IL6 [Gene ID=3569].                                                                                                                                                                                                                      | MSigDBv3.0 CGP                          | 16  | 4  | 0.1 | 36.9 | 1.14E-05 | 0.0716 | 0.000412 | CTGF, LOXL2, SERPINE1, SULF1                                                                                                                                        |
| module 18                                           | others       |           |            | Genes in module_18                                                                                                                                                                                                                                                                                            | MSigDBv3.0 CM                           | 435 | 15 | 4   | 4.1  | 1.18E-05 | 0.0745 | 0.000426 | ANXA2, ATP1A1, CAV1, CD151, CRIM1, EPS8, FN1, HEG1, ITGA6, LAMB1, PLK2, SEMA3F, SERPINE1, TM4SF1, WWTR1                                                             |
| KEGG SMALL CELL LUNG CANCER                         | tumor        | other     |            | Small cell lung cancer                                                                                                                                                                                                                                                                                        | MSigDBv3.0 CP:KEGG                      | 84  | 7  | 0.8 | 10.2 | 1.20E-05 | 0.0756 | 0.00043  | COL4A2, FN1, ITGA6, ITGAV, LAMA4, LAMB1, LAMB2                                                                                                                      |
| CERVERA SDHB TARGETS 1 UP                           | tumor        | other     |            | Genes turned on in Hep3B cells (hepatocellular carcinoma, HCC) upon knockdown of SDHB [Gene ID=6390] by RNAi.                                                                                                                                                                                                 | MSigDBv3.0 CGP                          | 117 | 8  | 1.1 | 8.3  | 1.23E-05 | 0.0776 | 0.000439 | AQP1, ARHGAP23, CXCR7, EDN1, FSTL1, GOLM1, LOXL2, MYOF                                                                                                              |
| WGGAATGY V\$TEF1 Q6                                 | TF           | TEAD1     |            | Genes with promoter regions [-2kb,2kb] around transcription start site containing the motif WGGAATGY which matches annotation for TEAD1: TEA domain family member 1 (SV40 transcriptional enhancer factor)                                                                                                    | MSigDBv3.0 TFT                          | 284 | 12 | 2.6 | 5.1  | 1.25E-05 | 0.0791 | 0.000445 | CAV1, CTGF, EDN1, FSTL1, ITGB4, KIF1C, LAMB2, MDK, NRG1, PLS3, PTMS, PTRF                                                                                           |
| AMIT SERUM RESPONSE 240 MCF10A                      | signaling    | serum     | MCF10A     | Genes whose expression peaked at 240 min after stimulation of MCF10A cells with serum.                                                                                                                                                                                                                        | MSigDBv3.0 CGP                          | 57  | 6  | 0.5 | 13.1 | 1.33E-05 | 0.0841 | 0.00047  | EMP1, PVRL2, SERPINE1, TJP1, TM4SF1, TNFRSF21                                                                                                                       |
| GLYCOSAMINOGLYCAN BINDING                           | ECM          | component |            | Genes annotated by the GO term GO:0005539. Interacting selectively with any glycan (polysaccharide) containing a substantial proportion of aminomonosaccharide residues.                                                                                                                                      | MSigDBv3.0 MF                           | 34  | 5  | 0.3 | 19.2 | 1.37E-05 | 0.0861 | 0.000476 | FSTL1, MDK, POSTN, TNXB, VCAN                                                                                                                                       |
| module 419                                          | others       |           |            | Genes in module_419                                                                                                                                                                                                                                                                                           | MSigDBv3.0 CM                           | 34  | 5  | 0.3 | 19.2 | 1.37E-05 | 0.0861 | 0.000476 | DSTN, FLNB, FLNC, PLS3, SPTAN1                                                                                                                                      |
| module 75                                           | others       |           |            | Genes in module_75: Immune response                                                                                                                                                                                                                                                                           | MSigDBv3.0 CM                           | 390 | 14 | 3.6 | 4.3  | 1.49E-05 | 0.0941 | 0.000518 | CD59, CFH, CRIP1, CTGF, EDN1, EMP1, EPS8, FN1, GAS6, IFI27, IL1R1, MDK, PTMS, TEK                                                                                   |
| RUTELLA RESPONSE TO CSF2RB AND IL4 UP               | others       |           |            | Genes up-regulated in peripheral blood monocytes by CSF2RB (GM-CSF) [Gene ID=1437] and IL4 [Gene ID=3565].                                                                                                                                                                                                    | MSigDBv3.0 CGP                          | 339 | 13 | 3.1 | 4.6  | 1.52E-05 | 0.096  | 0.000526 | ANXA2, CD59, CD9, CRIM1, CRIP1, FSCN1, GAS6, HSPB1, IL1R1, MAOA, MMP2, PVRL2, SERPINE1                                                                              |
| CHIARADONNA NEOPLASTIC TRANSFORMATION KRAS CDC25 UP | tumor        | other     |            | Genes up-regulated in NIH3T3 cells (fibroblasts) transformed by activated KRAS [Gene ID=3845] vs those reverted to normal cells upon over-expression of a dominant negative form of CDC25 [Gene ID=5923].                                                                                                     | MSigDBv3.0 CGP                          | 59  | 6  | 0.5 | 12.7 | 1.63E-05 | 0.103  | 0.00056  | ANGPTL2, APCDD1, CD9, GJA1, ITGA6, WWTR1                                                                                                                            |
| POLYSACCHARIDE BINDING                              | others       |           |            | Genes annotated by the GO term GO:0030247. Interacting selectively with any polysaccharide.                                                                                                                                                                                                                   | MSigDBv3.0 MF                           | 36  | 5  | 0.3 | 17.9 | 1.82E-05 | 0.115  | 0.000622 | FSTL1, MDK, POSTN, TNXB, VCAN                                                                                                                                       |
| SENESE HDAC3 TARGETS DN                             | tumor        | other     |            | Genes down-regulated in U2OS cells (osteosarcoma) upon knockdown of HDAC3 [Gene ID=8841] by RNAi.                                                                                                                                                                                                             | MSigDBv3.0 CGP                          | 508 | 16 | 4.7 | 3.8  | 1.84E-05 | 0.116  | 0.000625 | BCAM, CGNL1, COL3A1, COL5A2, CRIM1, CTGF, CXCR7, DCHS1, EDN1, HEG1, KIAA1522, MAOA, PLXND1, PTRF, SCARA3, SYNPO                                                     |
| AMIT EGF RESPONSE 480 HELA                          | signaling    | EGF       | Hela       | Genes whose expression peaked at 480 min after stimulation of HeLa cells with EGF [Gene ID=1950].                                                                                                                                                                                                             | MSigDBv3.0 CGP                          | 162 | 9  | 1.5 | 6.7  | 1.88E-05 | 0.118  | 0.000633 | AGRN, COL4A2, ITGA6, PLEC, RHOC, SERPINE1, SERPINE2, TM4SF1, TNFRSF21                                                                                               |
| DAZARD UV RESPONSE CLUSTER G24                      | tumor        | other     |            | Cluster G24: genes induced in NHEK (normal keratinocyte) but not in SCC12B2 cells (squamous cell carcinoma) by UV-B radiation.                                                                                                                                                                                | MSigDBv3.0 CGP                          | 18  | 4  | 0.2 | 31.6 | 1.88E-05 | 0.118  | 0.000633 | ECM1, IFI27, IL1R1L1, TM4SF1                                                                                                                                        |
| HELLER HDAC TARGETS SILENCED BY METHYLATION UP      | tumor        | other     |            | Genes up-regulated in multiple myeloma (MM) cell lines treated with both decitabine [PubChem=451668] TSA [PubChem=5562].                                                                                                                                                                                      | MSigDBv3.0 CGP                          | 399 | 14 | 3.7 | 4.2  | 1.92E-05 | 0.121  | 0.000642 | AGRN, CD9, CFH, COL6A2, CRIP2, FBN1, FLNB, FN1, FSCN1, ID1, IFI27, ITGA6, PLK2, SERPINE2                                                                            |

|                                                                |        |           |                                      |                                                                                                                                                                                                                                                                      |                                       |     |    |     |      |          |       |          |                                                                                                                         |
|----------------------------------------------------------------|--------|-----------|--------------------------------------|----------------------------------------------------------------------------------------------------------------------------------------------------------------------------------------------------------------------------------------------------------------------|---------------------------------------|-----|----|-----|------|----------|-------|----------|-------------------------------------------------------------------------------------------------------------------------|
| RUTELLA RESPONSE TO HGF VS CSF2RB AND IL4 DN                   | others |           |                                      | Genes down-regulated in peripheral blood mononucleocytes by HGF [Gene ID=3082] compared to those regulated by CSF2RB (GM-CSF) [Gene ID=1437] and IL4 [Gene ID=3565].                                                                                                 | MSigDBv3.0 CGP                        | 249 | 11 | 2.3 | 5.3  | 1.93E-05 | 0.121 | 0.000642 | ANXA2, CD59, CRIP1, FSCN1, GAS6, HSPB1, IL1R1, MAOA, NRG1, PVRL2, VCAN                                                  |
| VSGATA C                                                       | TF     | GATA1     |                                      | Genes with promoter regions [-2kb,2kb] around transcription start site containing the motif NGATAAGNMNN which matches annotation for GATA1: GATA binding protein 1 (globin transcription factor 1)                                                                   | MSigDBv3.0 TFT                        | 207 | 10 | 1.9 | 5.8  | 2.17E-05 | 0.136 | 0.000718 | BMP6, CD34, EDN1, FBXL7, GATA6, GPR116, IL1RL1, PKHD1L1, PVRL2, TEK                                                     |
| FLECHNER BIOPSY KIDNEY TRANSPLANT OK VS DONOR UP               | others |           |                                      | Genes differentially expressed in kidney biopsies from patients with well functioning kidneys more than 1-year post transplant compared to the biopsies from normal living kidney donors.                                                                            | MSigDBv3.0 CGP                        | 580 | 17 | 5.3 | 3.5  | 2.50E-05 | 0.157 | 0.000822 | CD9, CDH11, CFH, COL1A2, COL3A1, DSTN, EPS8, ID1, MAOA, MYH10, MYOF, PLS3, SERPINE2, TEK, VCAN, VIM, WWTR1              |
| REACTOME CELL SURFACE INTERACTIONS AT THE VASCULAR WALL        | ECM    | adhesion  | membrane interact with vascular wall | Genes involved in Cell surface interactions at the vascular wall                                                                                                                                                                                                     | MSigDBv3.0 CP:REACTOME                | 94  | 7  | 0.9 | 9    | 2.51E-05 | 0.158 | 0.000822 | CAV1, COL1A2, FN1, GAS6, ITGA6, ITGAV, TEK                                                                              |
| RTAAACA V\$FREAC2 01                                           | TF     | FOXF2     |                                      | Genes with promoter regions [-2kb,2kb] around transcription start site containing the motif RTAAACA which matches annotation for FOXF2: forkhead box F2                                                                                                              | MSigDBv3.0 TFT                        | 709 | 19 | 6.5 | 3.2  | 2.83E-05 | 0.178 | 0.000922 | ANXA2, CTGF, EDN1, EFEMP1, EMP1, FSTL1, GJA1, HSPG2, MDK, NPDC1, NRG1, NTN1, PALM, PLS3, PTGIS, PTMS, SULF1, SYNPO, TEK |
| MOROSETTI FACIOSCAPULOHUMERAL MUSCULAR DYSTROPHY UP            | others |           |                                      | Genes up-regulated in FSHD (facioscapulohumeral muscular dystrophy) mesoangioblasts.                                                                                                                                                                                 | MSigDBv3.0 CGP                        | 20  | 4  | 0.2 | 27.7 | 2.94E-05 | 0.185 | 0.000953 | ID1, IFI27, LPHN2, POSTN                                                                                                |
| module 128                                                     | others |           |                                      | Genes in module_128                                                                                                                                                                                                                                                  | MSigDBv3.0 CM                         | 97  | 7  | 0.9 | 8.7  | 3.08E-05 | 0.194 | 0.000992 | CD151, CDH13, FN1, GAS6, IL1R1, MMP2, VIM                                                                               |
| HUANG FOXA2 TARGETS DN                                         | tumor  | other     |                                      | Genes down-regulated in H358 cells (lung cancer) by inducible expression of FOXA2 [GeneID=3170] in a Tet-off system.                                                                                                                                                 | MSigDBv3.0 CGP                        | 40  | 5  | 0.4 | 15.9 | 3.09E-05 | 0.194 | 0.000992 | COL6A1, CRIP2, ITGB4, LEPR, LOXL2                                                                                       |
| module 121                                                     | others |           |                                      | Genes in module_121                                                                                                                                                                                                                                                  | MSigDBv3.0 CM                         | 98  | 7  | 0.9 | 8.6  | 3.29E-05 | 0.207 | 0.00105  | CRIP1, EDN1, EMP1, EPHB4, EPS8, GAS6, MDK                                                                               |
| module 170                                                     | others |           |                                      | Genes in module_170: Immune response                                                                                                                                                                                                                                 | MSigDBv3.0 CM                         | 99  | 7  | 0.9 | 8.5  | 3.51E-05 | 0.221 | 0.00112  | CD151, CDH13, FN1, GAS6, IL1R1, MMP2, VIM                                                                               |
| SMID BREAST CANCER NORMAL LIKE UP                              | tumor  | breast    | normal-like                          | Genes up-regulated in the normal-like subtype of breast cancer.                                                                                                                                                                                                      | MSigDBv3.0 CGP                        | 478 | 15 | 4.4 | 3.7  | 3.53E-05 | 0.222 | 0.00112  | AQP1, CAV1, CFH, CLEC3B, EFEMP1, GPR116, ID1, IL1R1, IL33, LAMA4, LEPR, PLA2G2A, PLTP, TIE1, TNXB                       |
| BASAL LAMINA                                                   | ECM    | component |                                      | Genes annotated by the GO term GO:0005605. A thin sheet of proteoglycans and glycoproteins, especially laminin, secreted by cells as an extracellular matrix.                                                                                                        | MSigDBv3.0 CC                         | 21  | 4  | 0.2 | 26   | 3.60E-05 | 0.226 | 0.00113  | AGRN, LAMA4, LAMB1, LAMB2                                                                                               |
| TONKS TARGETS OF RUNX1 RUNX1T1 FUSION SUSTAINED IN MONOCYTE UP | others |           |                                      | Genes up-regulated by RUNX1-RUNX1T1 [Gene ID=861, 862] fusion protein in normal hematopoietic progenitors; their expression was sustained in subsequently developing monocytes.                                                                                      | MSigDBv3.0 CGP                        | 21  | 4  | 0.2 | 26   | 3.60E-05 | 0.226 | 0.00113  | ALDH1A2, EPS8, HSPB1, TM45F1                                                                                            |
| KYNG DNA DAMAGE UP                                             | others |           |                                      | Genes changed after DNA damage in cell lines from young donors, and that had a GO annotation.                                                                                                                                                                        | MSigDBv3.0 CGP                        | 100 | 7  | 0.9 | 8.4  | 3.75E-05 | 0.235 | 0.00117  | COL3A1, CTGF, FBLN2, FN1, ID1, SERPINE2, VIM                                                                            |
| CROMER TUMORIGENESIS DN                                        | tumor  | other     |                                      | Tumorigenesis markers of head and neck squamous cell carcinoma (HNSCC): down-regulated in the 'early' tumors vs normal samples.                                                                                                                                      | MSigDBv3.0 CGP                        | 42  | 5  | 0.4 | 15   | 3.93E-05 | 0.247 | 0.00121  | CLEC3B, ECM1, EMP1, MUC1, PLA2G2A                                                                                       |
| MCGARVEY SILENCED BY METHYLATION IN COLON CANCER               | tumor  | other     |                                      | Genes silenced in HCT116 cells (colon cancer) by methylation of CpG islands in their promoters.                                                                                                                                                                      | MSigDBv3.0 CGP                        | 42  | 5  | 0.4 | 15   | 3.93E-05 | 0.247 | 0.00121  | DKK3, EFEMP1, FBLN2, GATA4, SFRP5                                                                                       |
| PAPASPYRIDONOS UNSTABLE ATEROSCLEROTIC PLAQUE DN               | others |           |                                      | Genes down-regulated in unstable atheroslerotic plaques compared to the stable ones.                                                                                                                                                                                 | MSigDBv3.0 CGP                        | 42  | 5  | 0.4 | 15   | 3.93E-05 | 0.247 | 0.00121  | CRIM1, DSTN, GJA1, HSPB1, PTGIS                                                                                         |
| BOS BRAIN UP                                                   | tumor  | breast    | metastasis                           | bos nature 2009 up in breast cancer likely to metastasize to brain                                                                                                                                                                                                   | bos nature 2009 supplementary table 2 | 141 | 8  | 1.3 | 6.8  | 4.74E-05 | 0.298 | 0.00145  | COL5A1, CRIP2, FSCN1, GJA1, ITGB4, LPHN2, SERPINE2, SYNPO                                                               |
| ACTIN CYTOSKELETON ORGANIZATION AND BIOGENESIS                 | others |           |                                      | Genes annotated by the GO term GO:0030036. A process that is carried out at the cellular level which results in the formation, arrangement of constituent parts, or disassembly of cytoskeletal structures comprising actin filaments and their associated proteins. | MSigDBv3.0 BP                         | 104 | 7  | 1   | 8.1  | 4.82E-05 | 0.303 | 0.00147  | CDC42BPB, DSTN, FGD5, FLNB, FSCN1, RHOJ, TNXB                                                                           |

|                                                  |              |           |            |                                                                                                                                                                                                                                                                                                                 |                                       |      |    |      |      |          |       |         |                                                                                                                                                                                                      |
|--------------------------------------------------|--------------|-----------|------------|-----------------------------------------------------------------------------------------------------------------------------------------------------------------------------------------------------------------------------------------------------------------------------------------------------------------|---------------------------------------|------|----|------|------|----------|-------|---------|------------------------------------------------------------------------------------------------------------------------------------------------------------------------------------------------------|
| V\$NFAT Q6                                       | TF           | NFAT      |            | Genes with promoter regions [-2kb,2kb] around transcription start site containing the motif NANWGGAAAANN which matches annotation for NFAT<br>NFATC                                                                                                                                                             | MSigDBv3.0 TFT                        | 183  | 9  | 1.7  | 5.8  | 4.90E-05 | 0.307 | 0.00149 | COL3A1, EDN1, EMP1, GATA4, HSPG2, MAGED1, SULF1, TEK, TNXB                                                                                                                                           |
| CARBOHYDRATE BINDING module 220                  | others       |           |            | Genes annotated by the GO term GO:0030246. Interacting selectively with any carbohydrate.                                                                                                                                                                                                                       | MSigDBv3.0 MF                         | 72   | 6  | 0.7  | 10.2 | 5.13E-05 | 0.322 | 0.00155 | CD34, FSTL1, MDK, POSTN, TNXB, VCAN                                                                                                                                                                  |
|                                                  | others       |           |            | Genes in module_220: Developmental processes                                                                                                                                                                                                                                                                    | MSigDBv3.0 CM                         | 328  | 12 | 3    | 4.3  | 5.15E-05 | 0.323 | 0.00155 | CTGF, DPYSL3, EMP1, EPS8, FBN1, GJA1, ID1, LEPR, MDK, NRG1, PTMS, TEK                                                                                                                                |
| HEPARIN BINDING                                  | ECM          | component |            | Genes annotated by the GO term GO:0008201. Interacting selectively with heparin, any member of a group of glycosaminoglycans found mainly as an intracellular component of mast cells and which consist predominantly of alternating alpha1-4-linked D-galactose and N-acetyl-D-glucosamine-6-sulfate residues. | MSigDBv3.0 MF                         | 23   | 4  | 0.2  | 23.3 | 5.25E-05 | 0.33  | 0.00156 | FSTL1, MDK, POSTN, TNXB                                                                                                                                                                              |
| JEON SMAD6 TARGETS UP                            | signaling    | SMAD      |            | Genes up-regulated in H1299 cells (lung cancer) upon knockdown of SMAD6 [Gene ID=4091] by RNAi.                                                                                                                                                                                                                 | MSigDBv3.0 CGP                        | 23   | 4  | 0.2  | 23.3 | 5.25E-05 | 0.33  | 0.00156 | DKK3, FBN1, NRG1, SERPINE1                                                                                                                                                                           |
| PATTERN BINDING module 154                       | ECM          | component |            | Genes annotated by the GO term GO:0001871. Interacting selectively with a repeating or polymeric structure, such as a polysaccharide or peptidoglycan.                                                                                                                                                          | MSigDBv3.0 MF                         | 45   | 5  | 0.4  | 13.9 | 5.53E-05 | 0.346 | 0.00164 | FSTL1, MDK, POSTN, TNXB, VCAN                                                                                                                                                                        |
|                                                  | cytoskeleton |           |            | Genes in module_154: Intermediate filaments                                                                                                                                                                                                                                                                     | MSigDBv3.0 CM                         | 73   | 6  | 0.7  | 10   | 5.55E-05 | 0.348 | 0.00164 | CAV1, ITGA6, ITGB4, MAOA, SERPINE1, TM4SF1                                                                                                                                                           |
| BOS BRAIN DN                                     | tumor        | breast    | metastasis | bos nature 2009 down in breast cancer likely to metastasize to brain                                                                                                                                                                                                                                            | bos nature 2009 supplementary table 2 | 107  | 7  | 1    | 7.8  | 5.79E-05 | 0.363 | 0.0017  | ADAMTS1, CAV1, CTGF, EDN1, HSPB1, LAMA4, SERPINE1                                                                                                                                                    |
| LEE NEURAL CREST STEM CELL UP                    | others       |           |            | Genes up-regulated in the neural crest stem cells (NCS), defined as p75+/HNK1+ [Gene ID=4804, 27087].                                                                                                                                                                                                           | MSigDBv3.0 CGP                        | 146  | 8  | 1.3  | 6.5  | 6.07E-05 | 0.38  | 0.00177 | BGN, COL1A2, COL3A1, IGFBP7, LAMB1, PODXL, POSTN, S100A10                                                                                                                                            |
| BERTUCCI INVASIVE CARCINOMA DUCTAL VS LOBULAR DN | tumor        | breast    | IDC vs ILC | Genes down-regulated in the invasive ductal carcinoma (IDC) compared to the invasive lobular carcinoma (ILC), the two major pathological types of breast cancer.                                                                                                                                                | MSigDBv3.0 CGP                        | 46   | 5  | 0.4  | 13.6 | 6.15E-05 | 0.386 | 0.00179 | CAV1, CD34, ELN, TEK, TNXB                                                                                                                                                                           |
| ZHANG ANTIVIRAL RESPONSE TO RIBAVIRIN UP         | tumor        | other     |            | Genes up-regulated in A549 cells (lung carcinoma) upon infection with RSV (respiratory syncytial virus) and up-regulated by further treatment with ribavirin [PubChem=5064].                                                                                                                                    | MSigDBv3.0 CGP                        | 24   | 4  | 0.2  | 22.1 | 6.26E-05 | 0.392 | 0.00181 | CFH, GJA1, IFI27, MDK                                                                                                                                                                                |
| J1 RESPONSE TO FSH DN                            | tumor        | other     |            | Down-regulated in ovarian epithelial cells (MCV152) 72 hours following FSH treatment, compared to untreated                                                                                                                                                                                                     | MSigDBv3.0 CGP                        | 47   | 5  | 0.4  | 13.2 | 6.84E-05 | 0.428 | 0.00196 | EMP1, FN1, ITGA6, SERPINE1, VCAN                                                                                                                                                                     |
| NUTT GBM VS AO GLIOMA UP                         | tumor        | other     |            | Top 50 marker genes for glioblastoma multiforme (GBM), a class of high grade glioma.                                                                                                                                                                                                                            | MSigDBv3.0 CGP                        | 47   | 5  | 0.4  | 13.2 | 6.84E-05 | 0.428 | 0.00196 | ANXA2, ITGB4, LAMB2, RHOC, VIM                                                                                                                                                                       |
| ACEVEDO LIVER CANCER UP                          | tumor        | other     |            | Genes up-regulated in hepatocellular carcinoma (HCC) compared to normal liver samples.                                                                                                                                                                                                                          | MSigDBv3.0 CGP                        | 962  | 22 | 8.8  | 2.8  | 7.07E-05 | 0.442 | 0.00202 | ADAM15, CD9, CDH5, CLEC3B, COL1A2, COL3A1, COL4A2, FOXC1, GPR116, HSPB1, IFI27, IGFBP7, ITGAV, KIF1C, LAMB1, PLS3, PLVAP, RNASE1, S100A10, SLCO2A1, TJP1, VIM                                        |
| WAMUNYOKOLI OVARIAN CANCER LMP DN                | tumor        | other     |            | Genes down-regulated in mucinous ovarian carcinoma tumors of low malignant potential (LMP) compared to normal ovarian surface epithelium tissue.                                                                                                                                                                | MSigDBv3.0 CGP                        | 192  | 9  | 1.8  | 5.6  | 7.10E-05 | 0.445 | 0.00202 | CAV1, CRIM1, DPYSL3, EFEMP1, FBXL7, FLNC, LAMA4, MYH10, SULF1                                                                                                                                        |
| BLALOCK ALZHEIMERS DISEASE INCIPIENT UP          | others       |           |            | Genes up-regulated in patients at the incipient stage of Alzheimer's disease.                                                                                                                                                                                                                                   | MSigDBv3.0 CGP                        | 394  | 13 | 3.6  | 3.9  | 7.20E-05 | 0.451 | 0.00204 | ANGPTL2, BGN, EFEMP1, EPS8, FBN1, FLNC, GJA1, ITGA6, LAMA4, PTGIS, TNXB, VCAN, WWTR1                                                                                                                 |
| WANG ESOPHAGUS CANCER VS NORMAL UP               | tumor        | other     |            | Genes specific to esophageal adenocarcinoma (EAC) relative to normal tissue.                                                                                                                                                                                                                                    | MSigDBv3.0 CGP                        | 111  | 7  | 1    | 7.5  | 7.31E-05 | 0.457 | 0.00206 | CD34, COL3A1, COL5A2, FN1, GPRC5B, IGFBP7, SERPINE1                                                                                                                                                  |
| module 105                                       | others       |           |            | Genes in module_105                                                                                                                                                                                                                                                                                             | MSigDBv3.0 CM                         | 194  | 9  | 1.8  | 5.5  | 7.69E-05 | 0.481 | 0.00216 | COL3A1, COL4A2, COL5A2, CTGF, EMP1, GJA1, HSPB1, LAMB1, VCAN                                                                                                                                         |
| CTTTGT V\$LEF1 Q2                                | TF           | LEF1      |            | Genes with promoter regions [-2kb,2kb] around transcription start site containing the motif CTTTGT which matches annotation for LEF1: lymphoid enhancer-binding factor 1                                                                                                                                        | MSigDBv3.0 TFT                        | 1481 | 29 | 13.6 | 2.4  | 7.76E-05 | 0.486 | 0.00217 | ANGPTL2, AQP1, CDH11, CDH5, COL3A1, CRIM1, CRIP2, DKK2, DPYSL3, EPS8, GJA1, GPRC5B, HYAL2, LAMA4, LPHN2, LTBP3, MDK, MMRN2, MYH10, NRG1, NTN1, PALM, PLK2, PTMS, PVRL2, ROBO4, SEMA3F, TNFRSF21, VIM |
| module 297                                       | others       |           |            | Genes in module_297                                                                                                                                                                                                                                                                                             | MSigDBv3.0 CM                         | 78   | 6  | 0.7  | 9.3  | 8.06E-05 | 0.504 | 0.00223 | CAV1, ITGA6, ITGB4, MAOA, SERPINE1, TM4SF1                                                                                                                                                           |
| module 357                                       | cytoskeleton |           |            | Genes in module_357: Intermediate filaments and keratins                                                                                                                                                                                                                                                        | MSigDBv3.0 CM                         | 78   | 6  | 0.7  | 9.3  | 8.06E-05 | 0.504 | 0.00223 | CAV1, ITGA6, ITGB4, MAOA, SERPINE1, TM4SF1                                                                                                                                                           |
| INTERCELLULAR JUNCTION ASSEMBLY                  | ECM          | adhesion  |            | Genes annotated by the GO term GO:0007043. The aggregation, arrangement and bonding together of a set of components to form a junction between cells.                                                                                                                                                           | MSigDBv3.0 BP                         | 10   | 3  | 0.1  | 47.2 | 8.64E-05 | 0.541 | 0.00239 | CD9, GJA1, TJP1                                                                                                                                                                                      |

|                                                      |        |       |          |                                                                                                                                                                                                                                       |                           |      |    |      |      |          |       |         |                                                                                                                                                                                                    |
|------------------------------------------------------|--------|-------|----------|---------------------------------------------------------------------------------------------------------------------------------------------------------------------------------------------------------------------------------------|---------------------------|------|----|------|------|----------|-------|---------|----------------------------------------------------------------------------------------------------------------------------------------------------------------------------------------------------|
| module 72                                            | others |       |          | Genes in module_72: Testis genes                                                                                                                                                                                                      | MSigDBv3.0<br>CM          | 295  | 11 | 2.7  | 4.4  | 8.98E-05 | 0.562 | 0.00247 | CAV1, CLEC3B, COL1A2, COL6A2, CRIM1, ENG, FBLN2, GJA1, GPRC5B, IFI27, ITGA6                                                                                                                        |
| SANA RESPONSE TO IFNG DN                             | others |       |          | Genes down-regulated in five primary endothelial cell types (lung, aortic, iliac, dermal, and colon) by IFNG [Gene ID=3458].                                                                                                          | MSigDBv3.0<br>CGP         | 80   | 6  | 0.7  | 9.1  | 9.29E-05 | 0.581 | 0.00253 | ANGPTL2, ANXA2, CD34, GJA1, RHOC, TXNDC5                                                                                                                                                           |
| CONCANNON APOPTOSIS BY EPOXOMICIN UP                 | tumor  | other |          | Genes up-regulated in SH-SY5Y cells (neuroblastoma) after treatment with epoxomicin [PubChem=3035402], a protease inhibitor causing apoptosis.                                                                                        | MSigDBv3.0<br>CGP         | 246  | 10 | 2.3  | 4.8  | 9.30E-05 | 0.581 | 0.00253 | ALDH1A2, ANXA2, FLNC, HEG1, HSPB1, LRIG1, MEST, PLK2, SERPINE1, WWTR1                                                                                                                              |
| module 100                                           | others |       |          | Genes in module_100                                                                                                                                                                                                                   | MSigDBv3.0<br>CM          | 528  | 15 | 4.8  | 3.4  | 0.000108 | 0.675 | 0.00293 | AQP1, CDH11, CLEC3B, COL6A2, DPYSL3, FBXL7, GJA1, GPRC5B, IFI27, ITGA6, MAOA, MDK, PALM, RNASE1, VCAN                                                                                              |
| module 137                                           | others |       |          | Genes in module_137: CNS genes                                                                                                                                                                                                        | MSigDBv3.0<br>CM          | 530  | 15 | 4.9  | 3.4  | 0.000113 | 0.704 | 0.00303 | AQP1, CDH11, CLEC3B, COL6A2, DPYSL3, FBXL7, GJA1, GPRC5B, IFI27, ITGA6, MAOA, MDK, PALM, RNASE1, VCAN                                                                                              |
| TARTE PLASMA CELL VS PLASMABLAST UP                  | others |       |          | Genes up-regulated in mature plasma cells compared with plasmablastic B lymphocytes.                                                                                                                                                  | MSigDBv3.0<br>CGP         | 412  | 13 | 3.8  | 3.7  | 0.000113 | 0.704 | 0.00303 | CD34, CD9, FBN1, FLNB, FSCN1, FSTL1, HSPB1, MDK, PALM, RBMS2, RNASE1, TJP1, TNXB                                                                                                                   |
| RUGO ENVIRONMENTAL STRESS RESPONSE UP                | others |       |          | Human environmental stress response (H-ESR, ESR) signature: genes up-regulated in young donors after all of the stress types tested.                                                                                                  | MSigDBv3.0<br>CGP         | 28   | 4  | 0.3  | 18.4 | 0.000117 | 0.732 | 0.00314 | COL3A1, CTGF, FN1, VIM                                                                                                                                                                             |
| CLAUS PGR POSITIVE MENINGIOMA DN                     | tumor  | other | PGR      | Genes changed in meningioma samples positive for PGR [Gene ID=5241] compared to those without the receptor.                                                                                                                           | MSigDBv3.0<br>CGP         | 11   | 3  | 0.1  | 41.3 | 0.000118 | 0.737 | 0.00315 | FSTL1, HEG1, TM4SF1                                                                                                                                                                                |
| V\$GATA Q6                                           | TF     |       | GATA1    | Genes with promoter regions [-2kb,2kb] around transcription start site containing the motif WGATARN which matches annotation for GATA1: GATA binding protein 1 (globin transcription factor 1)                                        | MSigDBv3.0<br>TFT         | 161  | 8  | 1.5  | 5.9  | 0.00012  | 0.752 | 0.0032  | BMP6, CD34, EDN1, GATA6, GPR116, PVRL2, SFRP5, TNXB                                                                                                                                                |
| module 66                                            | others |       |          | Genes in module_66                                                                                                                                                                                                                    | MSigDBv3.0<br>CM          | 535  | 15 | 4.9  | 3.3  | 0.000125 | 0.78  | 0.00331 | AQP1, CDH11, CLEC3B, COL6A2, DPYSL3, FBXL7, GJA1, GPRC5B, IFI27, ITGA6, MAOA, MDK, PALM, RNASE1, VCAN                                                                                              |
| ONDER CDH1 TARGETS 2 DN                              | EMT    | gene  | CDH1     | Genes down-regulated in HMLE cells (immortalized nontransformed mammary epithelium) after E-cadherin (CDH1) [Gene ID=999] knockdown by RNAi.                                                                                          | MSigDBv3.0<br>CGP         | 476  | 14 | 4.4  | 3.5  | 0.000129 | 0.803 | 0.00339 | AGRN, ANO1, CD9, EDN1, FLNB, ITGA6, ITGB4, LPHN2, MAOA, NRG1, PERP, PLK2, SEMA3F, TNFRSF21                                                                                                         |
| AMUNDSON POOR SURVIVAL AFTER GAMMA RADIATION 8G      | tumor  | other | survival | Genes with basal expression distinguishing NCI-60 cell lines with poor survival after 8 Gy gamma irradiation.                                                                                                                         | MSigDBv3.0<br>CGP         | 85   | 6  | 0.8  | 8.5  | 0.00013  | 0.812 | 0.00342 | ITGAV, LAMB2, LOXL2, NFE2L1, PLK2, WWTR1                                                                                                                                                           |
| TONKS TARGETS OF RUNX1 RUNX1T1 FUSION GRANULOCYTE UP | others |       |          | Genes up-regulated in granulocytes by RUNX1-RUNX1T1 [Gene ID=861, 862] fusion.                                                                                                                                                        | MSigDBv3.0<br>CGP         | 54   | 5  | 0.5  | 11.3 | 0.000134 | 0.835 | 0.0035  | FSCN1, HSPB1, ID1, TIE1, TM4SF1                                                                                                                                                                    |
| LU TUMOR VASCULATURE UP                              | others |       |          | Genes up-regulated in endothelial cells derived from invasive ovarian cancer tissue.                                                                                                                                                  | MSigDBv3.0<br>CGP         | 29   | 4  | 0.3  | 17.7 | 0.000135 | 0.843 | 0.0035  | MUC1, POSTN, TNFRSF21, VCAN                                                                                                                                                                        |
| REACTOME ADHERENS JUNCTIONS INTERACTIONS             | ECM    |       | adhesion | Genes involved in Adherens junctions interactions                                                                                                                                                                                     | MSigDBv3.0<br>CP:REACTOME | 29   | 4  | 0.3  | 17.7 | 0.000135 | 0.843 | 0.0035  | CDH11, CDH13, CDH5, PVRL2                                                                                                                                                                          |
| V\$API Q4 01                                         | TF     |       | JUN      | Genes with promoter regions [-2kb,2kb] around transcription start site containing the motif TGAGTCAN which matches annotation for JUN: jun oncogene                                                                                   | MSigDBv3.0<br>TFT         | 210  | 9  | 1.9  | 5.1  | 0.000141 | 0.877 | 0.00363 | ADAM15, ECM1, EMP1, FSTL1, GJA1, ITGB4, LTBP3, SYNPO, TNXB                                                                                                                                         |
| TTGTTT V\$FOXO4 01                                   | TF     |       | others   | Genes with promoter regions [-2kb,2kb] around transcription start site containing the motif TTGTTT which matches annotation for MLLT7: myeloid/lymphoid or mixed-lineage leukemia (trithorax homolog, Drosophila); translocated to, 7 | MSigDBv3.0<br>TFT         | 1534 | 29 | 14.1 | 2.3  | 0.000143 | 0.894 | 0.00369 | ALDH1A2, CDH11, CDH5, COL1A2, CRIM1, CRIP2, EFEMP1, EMP1, FN1, FSTL1, GATA6, HSPG2, HYAL2, ID1, ITGB4, LAMA4, LPHN2, MRC2, NOS3, NRG1, NTN1, PALM, RBMS2, ROBO4, TEK, TJP1, TM4SF1, TNFRSF21, TNXB |
| CHIARADONNA NEOPLASTIC TRANSFORMATION KRAS CDC25 DN  | tumor  | other |          | Genes down-regulated in NIH3T3 cells (fibroblasts) transformed by activated KRAS [Gene ID=3845] vs those reverted to normal cells upon over-expression of a dominant negative form of CDC25 [Gene ID=5923].                           | MSigDBv3.0<br>CGP         | 55   | 5  | 0.5  | 11.1 | 0.000146 | 0.911 | 0.00375 | COL6A1, IL1R1, IL1RL1, LAMA4, MAGED1                                                                                                                                                               |
| KYNG ENVIRONMENTAL STRESS RESPONSE UP                | others |       |          | All common stress response genes (Human Environmental Stress Response, H-ESR).                                                                                                                                                        | MSigDBv3.0<br>CGP         | 30   | 4  | 0.3  | 17   | 0.000155 | 0.964 | 0.00395 | COL3A1, CTGF, FN1, VIM                                                                                                                                                                             |
| CAIRO HEPATOBLASTOMA UP                              | tumor  | other |          | Genes up-regulated in hepatoblastoma samples compared to normal liver tissue.                                                                                                                                                         | MSigDBv3.0<br>CGP         | 213  | 9  | 2    | 5    | 0.000156 | 0.975 | 0.00395 | BCAM, CRIM1, GJA1, HSPB1, ITGA6, MAGED1, PLVAP, PODXL, SERPINE2                                                                                                                                    |
| INTERCELLULAR JUNCTION ASSEMBLY AND MAINTENANCE      | ECM    |       | adhesion | Genes annotated by the GO term GO:0045216. The assembly and maintenance of junctions between cells.                                                                                                                                   | MSigDBv3.0<br>BP          | 12   | 3  | 0.1  | 36.7 | 0.000156 | 0.975 | 0.00395 | CD9, GJA1, TJP1                                                                                                                                                                                    |

|                                                                   |           |            |             |                                                                                                                                                                                                                                                                                                                                                                                                                                                                                                                                  |                        |     |    |     |      |          |       |         |                                                                                                                |
|-------------------------------------------------------------------|-----------|------------|-------------|----------------------------------------------------------------------------------------------------------------------------------------------------------------------------------------------------------------------------------------------------------------------------------------------------------------------------------------------------------------------------------------------------------------------------------------------------------------------------------------------------------------------------------|------------------------|-----|----|-----|------|----------|-------|---------|----------------------------------------------------------------------------------------------------------------|
| REACTOME CASPASE MEDIATED CLEAVAGE OF CYTOSKELETAL PROTEINS       | signaling | apoptosis  |             | Genes involved in Caspase-mediated cleavage of cytoskeletal proteins                                                                                                                                                                                                                                                                                                                                                                                                                                                             | MSigDBv3.0 CP:REACTOME | 12  | 3  | 0.1 | 36.7 | 0.000156 | 0.975 | 0.00395 | PLEC, SPTAN1, VIM                                                                                              |
| ANATOMICAL STRUCTURE FORMATION                                    | others    |            |             | Genes annotated by the GO term GO:0048646. The process pertaining to the initial formation of an anatomical structure from unspecified parts. This process begins with the specific processes that contribute to the appearance of the discrete structure and ends when the structural rudiment is recognizable. An anatomical structure is any biological entity that occupies space and is distinguished from its surroundings. Anatomical structures can be macroscopic such as a carpel, or microscopic such as an acrosome. | MSigDBv3.0 BP          | 56  | 5  | 0.5 | 10.9 | 0.000159 | 0.993 | 0.00401 | CD9, CDH13, COL4A2, ROBO4, STAB1                                                                               |
| SMID BREAST CANCER RELAPSE IN BONE DN                             | tumor     | breast     | metastasis  | Genes down-regulated in bone relapse of breast cancer.                                                                                                                                                                                                                                                                                                                                                                                                                                                                           | MSigDBv3.0 CGP         | 316 | 11 | 2.9 | 4.1  | 0.000164 | 1     | 0.00412 | BGN, COL4A2, EDN1, ELN, FOXC1, FSCN1, ITGA6, PERP, TM4SF1, TNFRSF21, WWTR1                                     |
| KANG IMMORTALIZED BY TERT UP                                      | others    |            |             | Up-regulated genes in the signature of adipose stromal cells (ADSC) immortalized by forced expression of telomerase (TERT) [Gene ID=7015].                                                                                                                                                                                                                                                                                                                                                                                       | MSigDBv3.0 CGP         | 89  | 6  | 0.8 | 8.1  | 0.000168 | 1     | 0.00419 | BGN, COL6A2, ELN, LAMB1, LEPR, POSTN                                                                           |
| module 129                                                        | signaling |            |             | Genes in module_129: signaling                                                                                                                                                                                                                                                                                                                                                                                                                                                                                                   | MSigDBv3.0 CM          | 216 | 9  | 2   | 4.9  | 0.000174 | 1     | 0.00432 | CFH, DPYSL3, EFEMP1, GPRC5B, ITGA6, LEPR, MDK, NRG1, RNASE1                                                    |
| DASU IL6 SIGNALING SCAR UP                                        | signaling | IL6        |             | Genes up-regulated in hypertrophic scar fibroblasts in response to IL6 [Gene ID=3569].                                                                                                                                                                                                                                                                                                                                                                                                                                           | MSigDBv3.0 CGP         | 31  | 4  | 0.3 | 16.4 | 0.000176 | 1     | 0.00437 | AGRN, CLEC3B, PLEC, TNXB                                                                                       |
| GGGYGTGNY UNKNOWN                                                 | TF        | unknown    |             | Genes with promoter regions [-2kb,2kb] around transcription start site containing motif GGGYGTGNY. Motif does not match any known transcription factor                                                                                                                                                                                                                                                                                                                                                                           | MSigDBv3.0 TFT         | 492 | 14 | 4.5 | 3.4  | 0.000181 | 1     | 0.00447 | ANXA2, ATP1A1, BMP6, CAV1, CDH13, CDH5, COL1A2, FLNB, ITGB4, MDK, PALM, PERP, SSSCA1, VIM                      |
| KORKOLA TERATOMA                                                  | tumor     | other      |             | Genes predicting the teratoma (T) subtype of nonseminomatous male germ cell tumors (NSGCT).                                                                                                                                                                                                                                                                                                                                                                                                                                      | MSigDBv3.0 CGP         | 32  | 4  | 0.3 | 15.8 | 2.00E-04 | 1     | 0.00492 | ELN, EMP1, EPS8, TM4SF1                                                                                        |
| KEGG CELL ADHESION MOLECULES CAMS                                 | ECM       | adhesion   |             | Cell adhesion molecules (CAMs)                                                                                                                                                                                                                                                                                                                                                                                                                                                                                                   | MSigDBv3.0 CP:KEGG     | 131 | 7  | 1.2 | 6.3  | 0.000206 | 1     | 0.00503 | CD34, CDH5, ITGA6, ITGA9, ITGAV, PVRL2, VCAN                                                                   |
| RIGGINS TAMOXIFEN RESISTANCE DN                                   | tumor     | resistance | ER          | Genes down-regulated SUM44/LCCTam cells (breast cancer) resistant to 4-hydroxytamoxifen [PubChem=63062] relative to the parental SUM44 cells sensitive to the drug.                                                                                                                                                                                                                                                                                                                                                              | MSigDBv3.0 CGP         | 221 | 9  | 2   | 4.8  | 0.000206 | 1     | 0.00503 | COL3A1, EMP1, GJA1, IFI27, LTBP3, MUC1, MYOF, SCAR2, TM4SF1                                                    |
| module 46                                                         | others    |            |             | Genes in module_46                                                                                                                                                                                                                                                                                                                                                                                                                                                                                                               | MSigDBv3.0 CM          | 385 | 12 | 3.5 | 3.7  | 0.000232 | 1     | 0.00564 | CD59, CFH, CRIP1, EDN1, EMP1, EPS8, FN1, GAS6, IFI27, IL1R1, MDK, PTMS                                         |
| SMID BREAST CANCER BASAL DN                                       | tumor     | breast     | basal       | Genes down-regulated in basal subtype of breast cancer samles.                                                                                                                                                                                                                                                                                                                                                                                                                                                                   | MSigDBv3.0 CGP         | 702 | 17 | 6.4 | 2.9  | 0.000255 | 1     | 0.00617 | ANO1, BCAM, CLEC3B, CRIP1, CRIP2, CXCR7, ECM1, FBXL7, GJA1, HSPB1, IL33, LRIG1, MAOA, MUC1, NPDC1, TNXB, TPPP3 |
| DASU IL6 SIGNALING UP                                             | signaling | IL6        |             | Genes up-regulated in normal fibroblasts in response to IL6 [Gene ID=3569].                                                                                                                                                                                                                                                                                                                                                                                                                                                      | MSigDBv3.0 CGP         | 62  | 5  | 0.6 | 9.7  | 0.000258 | 1     | 0.00623 | AGRN, COL6A1, ENG, GAS6, PLEC                                                                                  |
| FRASOR RESPONSE TO ESTRADIOL DN                                   | tumor     | other      | ER          | Genes down-regulated in MCF-7 cells (breast cancer) by estradiol (E2) [PubChem=5757].                                                                                                                                                                                                                                                                                                                                                                                                                                            | MSigDBv3.0 CGP         | 63  | 5  | 0.6 | 9.6  | 0.000278 | 1     | 0.00669 | IL1R1, LAMB1, LAMB2, MUC1, PLK2                                                                                |
| POOLA INVASIVE BREAST CANCER DN                                   | tumor     | breast     | ADHC vs ADH | Genes down-regulated in atypical ductal hyperplastic tissues from patients with (ADHC) breast cancer vs those without the cancer (ADH).                                                                                                                                                                                                                                                                                                                                                                                          | MSigDBv3.0 CGP         | 138 | 7  | 1.3 | 6    | 0.000284 | 1     | 0.00677 | CD151, CD59, CLEC3B, DKK3, FLNB, LTBP3, LTBP4                                                                  |
| TAKEDA TARGETS OF NUP98 HOXA9 FUSION 10D DN                       | others    |            |             | Genes down-regulated in CD34+ [Gene ID=947] hematopoietic cells by expression of NUP98-HOXA9 fusion [Gene ID=4928, 3205] off a retroviral vector at 10 days after transduction.                                                                                                                                                                                                                                                                                                                                                  | MSigDBv3.0 CGP         | 138 | 7  | 1.3 | 6    | 0.000284 | 1     | 0.00677 | CD59, CD9, EMP1, IL1R1, MAOA, RNASE1, STAB1                                                                    |
| STOSSI RESPONSE TO ESTRADIOL                                      | tumor     | other      | ER          | Genes up-regulated by estradiol (E2) [PubChem=5757] in U2OS cells (osteosarcoma) expressing ESR1 or ESR2 [[Gene ID = 2099, 2100].                                                                                                                                                                                                                                                                                                                                                                                                | MSigDBv3.0 CGP         | 35  | 4  | 0.3 | 14.3 | 0.000285 | 1     | 0.00678 | BMP6, CD34, GJA1, ITGA6                                                                                        |
| CHANG POU5F1 TARGETS UP                                           | tumor     | other      |             | Genes up-regulated by POU5F1 [Gene ID=5460] in bladder cancer cell lines.                                                                                                                                                                                                                                                                                                                                                                                                                                                        | MSigDBv3.0 CGP         | 15  | 3  | 0.1 | 27.5 | 0.000317 | 1     | 0.00743 | COL3A1, COL5A1, FN1                                                                                            |
| KARAKAS TGFB1 SIGNALING                                           | signaling | TGFB       | MCF10A      | Genes up-regulated by TGFB1 [Gene ID=7040] in MCF10A cells (breast cancer): both wild-type and those lacking p21 [Gene ID=1026].                                                                                                                                                                                                                                                                                                                                                                                                 | MSigDBv3.0 CGP         | 15  | 3  | 0.1 | 27.5 | 0.000317 | 1     | 0.00743 | FN1, IGFBP7, MMP2                                                                                              |
| TONKS TARGETS OF RUNX1 RUNX1T1 FUSION SUSTAINED IN GRANULOCYTE UP | others    |            |             | Genes up-regulated by RUNX1-RUNX1T1 [Gene ID=861, 862] fusion protein in normal hematopoietic progenitors; their expression was sustained in subsequently developing granulocytes.                                                                                                                                                                                                                                                                                                                                               | MSigDBv3.0 CGP         | 15  | 3  | 0.1 | 27.5 | 0.000317 | 1     | 0.00743 | HSPB1, ID1, TM4SF1                                                                                             |
| BONOME OVARIAN CANCER SURVIVAL SUBOPTIMAL DEBULKING               | tumor     | other      | prognosis   | Genes whose expression in suboptimally debulked ovarian tumors is associated with survival prognosis.                                                                                                                                                                                                                                                                                                                                                                                                                            | MSigDBv3.0 CGP         | 520 | 14 | 4.8 | 3.2  | 0.000318 | 1     | 0.00743 | ADAM15, CAV1, CDH13, DCHS1, DKK2, EFEMP1, EPS8, GPR116, ITGB4, LEPR, MAOA, MYOF, PTRF, SEMA3F                  |
| VERRECCHIA DELAYED RESPONSE TO TGFB1                              | signaling | TGFB       | ECM         | ECM related genes up-regulated later than 30 min following addition of TGFB1 [Gene ID=7040] in dermal fibroblasts.                                                                                                                                                                                                                                                                                                                                                                                                               | MSigDBv3.0 CGP         | 36  | 4  | 0.3 | 13.8 | 0.000319 | 1     | 0.00743 | EPHB4, LAMB1, MMP2, SEMA3F                                                                                     |

|                                                                    |           |            |           |                                                                                                                                                                                                                                                      |                        |      |    |      |      |          |   |         |                                                                                                                                                                                               |
|--------------------------------------------------------------------|-----------|------------|-----------|------------------------------------------------------------------------------------------------------------------------------------------------------------------------------------------------------------------------------------------------------|------------------------|------|----|------|------|----------|---|---------|-----------------------------------------------------------------------------------------------------------------------------------------------------------------------------------------------|
| ALCALAY AML BY NPM1 LOCALIZATION UP                                | tumor     | other      |           | Genes changed in acute myeloid leukemia (AML) with respect to cellular localization of NPM1 [Gene ID=4869]: cytoplasmic vs. nucleolar.                                                                                                               | MSigDBv3.0 CGP         | 141  | 7  | 1.3  | 5.8  | 0.000323 | 1 | 0.00752 | CDC42BPB, CFH, DPYSL3, FOXC1, LAMB2, LRIG1, MMP2                                                                                                                                              |
| REACTOME SEMAPHORIN INTERACTIONS                                   | others    |            |           | Genes involved in Semaphorin interactions                                                                                                                                                                                                            | MSigDBv3.0 CP:REACTOME | 66   | 5  | 0.6  | 9.1  | 0.000346 | 1 | 0.00801 | DPYSL3, MYH10, PLXNA4, PLXND1, RHOC                                                                                                                                                           |
| V\$GATA3 01                                                        | TF        | GATA3      |           | Genes with promoter regions [-2kb,2kb] around transcription start site containing the motif NNGATARNG which matches annotation for GATA3: GATA binding protein 3                                                                                     | MSigDBv3.0             | 188  | 8  | 1.7  | 5    | 0.000347 | 1 | 0.00801 | BMP6, CD34, EDN1, EFEMP1, HSPG2, IL1RL1, PVRL2, TNXB                                                                                                                                          |
| BASAKI YBX1 TARGETS UP                                             | tumor     | other      |           | Genes up-regulated in SKOC-3 cells (ovarian cancer) after YB-1 (YBX1) [Gene ID=4904] knockdown by RNAi.                                                                                                                                              | MSigDBv3.0 CGP         | 290  | 10 | 2.7  | 4    | 0.000351 | 1 | 0.00809 | CAV1, CTGF, DKK3, DPYSL3, EHD2, FBN1, FLNB, PLK2, PTRF, TNFRSF21                                                                                                                              |
| REACTOME GENES INVOLVED IN APOPTOTIC CLEAVAGE OF CELLULAR PROTEINS | signaling | apoptosis  |           | Genes involved in Apoptotic cleavage of cellular proteins                                                                                                                                                                                            | MSigDBv3.0 CP:REACTOME | 37   | 4  | 0.3  | 13.4 | 0.000355 | 1 | 0.00813 | PLEC, SPTAN1, TJP1, VIM                                                                                                                                                                       |
| module 8                                                           | others    |            |           | Genes in module_8                                                                                                                                                                                                                                    | MSigDBv3.0 CM          | 405  | 12 | 3.7  | 3.5  | 0.000367 | 1 | 0.00838 | CAV1, CD151, COL5A2, CRIM1, EPS8, FN1, GJA1, ITGA6, MDK, MEST, SLC29A1, TM4SF1                                                                                                                |
| CHEN LVAD SUPPORT OF FAILING HEART UP                              | others    |            |           | Up-regulated genes in the left ventricle myocardium of patients with heart failure following implantation of LVAD (left ventricular assist device).                                                                                                  | MSigDBv3.0 CGP         | 103  | 6  | 0.9  | 6.9  | 0.000372 | 1 | 0.00846 | CTGF, FLNC, HYAL2, LAMB1, POSTN, SERPINE1                                                                                                                                                     |
| AACTTT UNKNOWN                                                     | TF        | unknown    |           | Genes with promoter regions [-2kb,2kb] around transcription start site containing motif AACTTT. Motif does not match any known transcription factor                                                                                                  | MSigDBv3.0 TTF         | 1467 | 27 | 13.4 | 2.2  | 0.000383 | 1 | 0.00868 | AQP1, CD34, CDH11, CDH13, CDH5, COL1A2, COL3A1, CRIM1, DPYSL3, GJA1, GPRC5B, HSPB1, HSPG2, ITGB4, LAMA4, LAMB2, LPHN2, MMP2, MYH10, NFE2L1, NRG1, NTN1, POSTN, PPP2R5B, SEMA3F, TNFRSF21, VIM |
| ONDER CDH1 TARGETS 3 UP                                            | EMT       | gene       | CDH1      | Genes up-regulated in HMLE cells (immortalized nontransformed mammary epithelial) cells after loss of function of E-cadherin (CDH1) [Gene ID=999], which was achieved either by RNAi knockdown or by expression of a dominant-negative form of CDH1. | MSigDBv3.0 CGP         | 16   | 3  | 0.1  | 25.4 | 0.000387 | 1 | 0.00876 | CRIP2, LEPR, MAGED1                                                                                                                                                                           |
| VANTVEER BREAST CANCER BRCA1 DN                                    | tumor     | other      |           | Down-regulated genes from the optimal set of 100 markers discriminating ER(-) breast cancer tumors by BRCA1 [Gene ID=672] mutation status.                                                                                                           | MSigDBv3.0 CGP         | 38   | 4  | 0.3  | 13   | 0.000393 | 1 | 0.00887 | CDH11, DKK3, GOLM1, TPPP3                                                                                                                                                                     |
| STRUCTURAL MOLECULE ACTIVITY                                       | ECM       | component  |           | Genes annotated by the GO term GO:0005198. The action of a molecule that contributes to the structural integrity of a complex or assembly within or outside a cell.                                                                                  | MSigDBv3.0 MF          | 242  | 9  | 2.2  | 4.4  | 0.000402 | 1 | 0.00903 | AGRN, CAV1, COL4A2, FBLN2, FBN1, LAMA4, LAMB1, SPTAN1, VIM                                                                                                                                    |
| RUIZ TNC TARGETS DN                                                | tumor     | other      |           | Genes down-regulated in T98G cells (glioblastoma) by TNC [Gene ID=3371].                                                                                                                                                                             | MSigDBv3.0 CGP         | 147  | 7  | 1.3  | 5.6  | 0.000416 | 1 | 0.00931 | CAV1, CRIM1, EFEMP1, MEST, MYOF, NRG1, SERPINE2                                                                                                                                               |
| WOO LIVER CANCER RECURRENCE UP                                     | tumor     | other      |           | Genes positively correlated with recurrence free survival in patients with hepatitis B-related (HBV) hepatocellular carcinoma (HCC).                                                                                                                 | MSigDBv3.0 CGP         | 106  | 6  | 1    | 6.7  | 0.000433 | 1 | 0.00966 | COL1A2, CRIP1, CTGF, DPYSL3, LAMA4, POSTN                                                                                                                                                     |
| WANG SMARCE1 TARGETS DN                                            | tumor     | other      |           | Genes down-regulated in BT549 cells (breast cancer) by expression of SMARCE1 [Gene ID=6605] off a retroviral vector.                                                                                                                                 | MSigDBv3.0 CGP         | 356  | 11 | 3.3  | 3.6  | 0.000455 | 1 | 0.0101  | ADAMTS1, CAV1, CD9, IFI27, LAMA4, LPHN2, NRG1, PLK2, SLC29A1, TM4SF1, TNFRSF21                                                                                                                |
| HORIUCHI WTAP TARGETS UP                                           | others    |            |           | Genes up-regulated in primary endothelial cells (HUVEC) after knockdown of WTAP [Gene ID=9589] by RNAi.                                                                                                                                              | MSigDBv3.0 CGP         | 305  | 10 | 2.8  | 3.8  | 0.000522 | 1 | 0.0116  | CDH11, CDH13, CFH, COL5A1, DKK3, FBN1, HMCN1, IL1R1, LRRC32, SERPINE2                                                                                                                         |
| TAKEDA TARGETS OF NUP98 HOXA9 FUSION 6HR DN                        | others    |            |           | Genes down-regulated in CD34+ [Gene ID=947] hematopoietic cells by expression of NUP98-HOXA9 fusion [Gene ID=4928, 3205] off a retroviral vector at 6h.                                                                                              | MSigDBv3.0 CGP         | 41   | 4  | 0.4  | 11.9 | 0.000528 | 1 | 0.0117  | AQP1, SERPINE1, SPTAN1, TM4SF1                                                                                                                                                                |
| THUM SYSTOLIC HEART FAILURE UP                                     | others    |            |           | Genes up-regulated in samples with systolic heart failure compared to normal hearts.                                                                                                                                                                 | MSigDBv3.0 CGP         | 424  | 12 | 3.9  | 3.3  | 0.000552 | 1 | 0.012   | DKK3, EDN1, ENG, IL33, LEPR, PLK2, RNASE1, SCARA3, SCARB2, SERPINE2, TM4SF1, VCAN                                                                                                             |
| HOSHIDA LIVER CANCER SURVIVAL UP                                   | tumor     | other      | prognosis | Survival signature genes defined in adjacent liver tissue: genes correlated with poor survival of hepatocellular carcinoma (HCC) patients.                                                                                                           | MSigDBv3.0 CGP         | 73   | 5  | 0.7  | 8.2  | 0.000553 | 1 | 0.012   | FBN1, ITGA9, LOXL2, PODXL, RNASE1                                                                                                                                                             |
| SESTO RESPONSE TO UV C8                                            | others    |            |           | Cluster 8: genes changed in primary keratinocytes by UVB irradiation.                                                                                                                                                                                | MSigDBv3.0 CGP         | 73   | 5  | 0.7  | 8.2  | 0.000553 | 1 | 0.012   | COL5A2, FLNB, LAMB1, MYH10, SERPINE1                                                                                                                                                          |
| GARGALOVIC RESPONSE TO OXIDIZED PHOSPHOLIPIDS GREY UP              | others    |            |           | Genes from the grey module which are up-regulated in HAEC cells (primary aortic endothelium) after exposure to the oxidized 1-palmitoyl-2-arachidonoyl-sn-3-glycerophosphorylcholine (oxPAPC).                                                       | MSigDBv3.0 CGP         | 18   | 3  | 0.2  | 22   | 0.000557 | 1 | 0.012   | ADAMTS1, EMP1, KIAA1522                                                                                                                                                                       |
| MAHADEVAN IMATINIB RESISTANCE DN                                   | tumor     | resistance | Imatinib  | Top genes down-regulated in the GIST (gastrointestinal stromal tumor) cell line resistant to imatinib [PubChem=5291] compared to the parental cell line sensitive to the drug.                                                                       | MSigDBv3.0 CGP         | 18   | 3  | 0.2  | 22   | 0.000557 | 1 | 0.012   | ALDH1A2, LPHN2, PTGIS                                                                                                                                                                         |

|                                                           |           |                     |                   |                                                                                                                                                                                                                                                   |                    |     |    |     |      |          |   |        |                                                                                         |
|-----------------------------------------------------------|-----------|---------------------|-------------------|---------------------------------------------------------------------------------------------------------------------------------------------------------------------------------------------------------------------------------------------------|--------------------|-----|----|-----|------|----------|---|--------|-----------------------------------------------------------------------------------------|
| VERRECCHIA RESPONSE TO TGFB1 C1                           | signaling | TGFB                | ECM               | Cluster 1: ECM related genes up-regulated in dermal fibroblasts within 30 min after TGFB1 [Gene ID=7040] addition, and which kept increasing with time.                                                                                           | MSigDBv3.0 CGP     | 18  | 3  | 0.2 | 22   | 0.000557 | 1 | 0.012  | HSPG2, SERPINE1, VCAN                                                                   |
| HATADA METHYLATED IN LUNG CANCER UP                       | tumor     | other               |                   | Genes with hypermethylated DNA in lung cancer samples.                                                                                                                                                                                            | MSigDBv3.0 CGP     | 365 | 11 | 3.3 | 3.5  | 0.00056  | 1 | 0.0121 | ANGPTL2, CDH13, COL1A2, COL5A1, LRIG1, MARVELD1, MMRN2, NOS3, PLTP, PTRF, TPPP3         |
| WONG ENDOMETRIUM CANCER DN                                | tumor     | other               |                   | Genes down-regulated in cancer endometrium samples compared to the normal endometrium.                                                                                                                                                            | MSigDBv3.0 CGP     | 42  | 4  | 0.4 | 11.6 | 0.00058  | 1 | 0.0125 | ALDH1A2, FBN1, GAS6, LTBP4                                                              |
| HUANG DASATINIB RESISTANCE UP                             | tumor     | other               | dasatinib         | Genes whose expression positively correlated with sensitivity of breast cancer cell lines to dasatinib [PubChem=3062316].                                                                                                                         | MSigDBv3.0 CGP     | 74  | 5  | 0.7 | 8    | 0.000588 | 1 | 0.0126 | CAV1, COL5A1, FSTL1, PTRF, TNFRSF21                                                     |
| KEGG ARRHYTHMOGENIC RIGHT VENTRICULAR CARDIOMYOPATHY ARVC | others    |                     |                   | Arrhythmogenic right ventricular cardiomyopathy (ARVC)                                                                                                                                                                                            | MSigDBv3.0 CP:KEGG | 74  | 5  | 0.7 | 8    | 0.000588 | 1 | 0.0126 | GJA1, ITGA6, ITGA9, ITGAV, ITGB4                                                        |
| YAGI AML WITH INV 16 TRANSLOCATION                        | tumor     | other               |                   | Genes specifically expressed in samples from patients with pediatric acute myeloid leukemia (AML) bearing inv(16) translocation.                                                                                                                  | MSigDBv3.0 CGP     | 429 | 12 | 3.9 | 3.3  | 0.000612 | 1 | 0.013  | BCAM, CD9, COL5A2, CRIM1, DPYSL3, EMP1, EPHB4, HSPB1, MEST, PLS3, S100A10, VIM          |
| CYTOSKELETON ORGANIZATION AND BIOGENESIS                  | others    |                     |                   | Genes annotated by the GO term GO:0007010. A process that is carried out at the cellular level which results in the formation, arrangement of constituent parts, or disassembly of cytoskeletal structures.                                       | MSigDBv3.0 BP      | 205 | 8  | 1.9 | 4.6  | 0.000616 | 1 | 0.013  | CDC42BPB, DSTN, FGD5, FLNB, FSCN1, MYH10, RHOJ, TNXB                                    |
| ALONSO METASTASIS UP                                      | tumor     | other               | metastasis        | Up-regulated genes in melanoma tumous that developed metastatic disease compared to primary melanoma that did not.                                                                                                                                | MSigDBv3.0 CGP     | 157 | 7  | 1.4 | 5.2  | 0.000617 | 1 | 0.013  | ALDH1A2, CAV1, EMP1, IL1RL1, ITGAV, MMP2, S100A10                                       |
| CHIBA RESPONSE TO TSA UP                                  | tumor     | other               |                   | Cancer related genes up-regulated in any of four hepatoma cell lines following 24 h treatment with TSA [PubChem=5562].                                                                                                                            | MSigDBv3.0 CGP     | 43  | 4  | 0.4 | 11.3 | 0.000635 | 1 | 0.0134 | BMP6, CD9, COL1A2, CTGF                                                                 |
| RICKMAN METASTASIS DN                                     | tumor     | other               | metastasis        | Genes down-regulated in metastatic vs non-metastatic HNSCC (head and neck squamous cell carcinoma) samples.                                                                                                                                       | MSigDBv3.0 CGP     | 258 | 9  | 2.4 | 4.1  | 0.000638 | 1 | 0.0134 | A4GALT, ADAM15, ITGB4, KIAA1522, MMP28, MUC1, PERP, S100A16, SEMA3F                     |
| BACOLOD RESISTANCE TO ALKYLATING AGENTS UP                | tumor     | resistance          | carmustine, O6-BG | Genes up-regulated in D-341 MED (OBR) cells (medulloblastoma) resistant to both carmustine and O6-BG [PubChem=2578, 4578].                                                                                                                        | MSigDBv3.0 CGP     | 19  | 3  | 0.2 | 20.6 | 0.000657 | 1 | 0.0136 | CDH11, MDK, MYOF                                                                        |
| DUNNE TARGETS OF AML1 MTG8 FUSION DN                      | tumor     | other               |                   | Genes down-regulated in Kasumi-1 cells (acute myeloid leukaemia (AML) with the t(8;21) translocation) after knockdown of the AML1 MTG8 fusion [Gene ID=861, 862] by RNAi.                                                                         | MSigDBv3.0 CGP     | 19  | 3  | 0.2 | 20.6 | 0.000657 | 1 | 0.0136 | CD34, ECM1, ID1                                                                         |
| module 400                                                | others    |                     |                   | Genes in module_400                                                                                                                                                                                                                               | MSigDBv3.0 CM      | 19  | 3  | 0.2 | 20.6 | 0.000657 | 1 | 0.0136 | COL5A1, EFEMP1, TIE1                                                                    |
| module 545                                                | signaling | IL1                 |                   | Genes in module_545: IL-1 signaling                                                                                                                                                                                                               | MSigDBv3.0 CM      | 19  | 3  | 0.2 | 20.6 | 0.000657 | 1 | 0.0136 | CDH13, IL1R1, IL1RL1                                                                    |
| ZHAN MULTIPLE MYELOMA SPIKED                              | tumor     | other               |                   | 'Spiked' genes: genes most highly up-regulated in multiple myeloma samples; were not differentially expressed as compared to the normal plasma cells.                                                                                             | MSigDBv3.0 CGP     | 19  | 3  | 0.2 | 20.6 | 0.000657 | 1 | 0.0136 | CTGF, FBLN2, IFI27                                                                      |
| CELL PROLIFERATION GO 0008283                             | others    |                     |                   | Genes annotated by the GO term GO:0008283. The multiplication or reproduction of cells, resulting in the expansion of a cell population.                                                                                                          | MSigDBv3.0 BP      | 501 | 13 | 4.6 | 3    | 0.000734 | 1 | 0.0151 | ADAMTS1, CDH13, CRIP1, EDN1, ELN, EMP1, EPHB4, EPS8, FSCN1, GAS6, IGFBP7, LAMB1, MAGED1 |
| ROSS AML WITH AML1 ETO FUSION                             | tumor     | other               |                   | Top 100 probe sets for pediatric acute myeloid leukemia (AML) subtype t(8;21); has AML1 ETO fusion [Gene ID=861, 862].                                                                                                                            | MSigDBv3.0 CGP     | 78  | 5  | 0.7 | 7.6  | 0.000749 | 1 | 0.0154 | CAV1, CD34, HYAL2, ITGB4, PALM                                                          |
| RGAGGAARY V\$PU1 Q6                                       | TF        | others              |                   | Genes with promoter regions [-2kb,2kb] around transcription start site containing the motif RGAGGAARY which matches annotation for SPI1: spleen focus forming virus (SFFV) proviral integration oncogene spi1                                     | MSigDBv3.0 TFT     | 379 | 11 | 3.5 | 3.4  | 0.000763 | 1 | 0.0156 | ADAM15, ANGPTL2, ELN, FLNC, MAGED1, MMRN2, PLVAP, RHOJ, S100A10, STAB1, VIM             |
| REGULATION OF SIGNAL TRANSDUCTION                         | signaling | signal transduction |                   | Genes annotated by the GO term GO:0009966. Any process that modulates the frequency, rate or extent of signal transduction.                                                                                                                       | MSigDBv3.0 BP      | 213 | 8  | 2   | 4.4  | 0.000791 | 1 | 0.0161 | CDC42BPB, CDH13, ECM1, ENG, FGD5, GJA1, PLK2, RHOC                                      |
| LI AMPLIFIED IN LUNG CANCER                               | tumor     | other               | amplicon          | Genes with increased copy number that correlates with increased expression across six different lung adenocarcinoma cell lines.                                                                                                                   | MSigDBv3.0 CGP     | 164 | 7  | 1.5 | 5    | 0.000798 | 1 | 0.0161 | BGN, COL1A2, FSCN1, HSPB1, MAGED1, MDK, MUC1                                            |
| MULLIGHAN NPM1 SIGNATURE 3 DN                             | tumor     | other               |                   | The 'NPM1 signature 3': genes down-regulated in pediatric AML (acute myeloid leukemia) with mutated NPM1 [Gene ID=4869] compared to the AML cases with intact NPM1 and MLL [(Gene ID=4297)].                                                      | MSigDBv3.0 CGP     | 164 | 7  | 1.5 | 5    | 0.000798 | 1 | 0.0161 | CD34, HEG1, HSPB1, HSPG2, LTBP4, SPTAN1, TPPP3                                          |
| CHIARADONNA NEOPLASTIC TRANSFORMATION CDC25 UP            | tumor     | other               |                   | Genes up-regulated in reverted NIH3T3 cells (fibroblasts transformed by activated KRAS [Gene ID=3845] which then reverted to normal cells upon stable over-expression of a dominant negative form of CDC25 [Gene ID=5923]) vs normal fibroblasts. | MSigDBv3.0 CGP     | 119 | 6  | 1.1 | 5.9  | 8.00E-04 | 1 | 0.0161 | IL1R1, IL1RL1, LAMA4, MAGED1, SYNPO, VCAN                                               |
| TSAI RESPONSE TO IONIZING RADIATION                       | others    |                     |                   | Genes up-regulated in TK6, WTK1, and NH32 cell lines (lymphoblast) in response to ionizing radiation.                                                                                                                                             | MSigDBv3.0 CGP     | 119 | 6  | 1.1 | 5.9  | 8.00E-04 | 1 | 0.0161 | CD59, COL4A2, COL6A1, DPYSL3, FN1, NFE2L1                                               |



|                                         |           |                 |               |                                                                                                                                                                              |                        |     |    |     |      |          |   |        |                                                                                                                     |
|-----------------------------------------|-----------|-----------------|---------------|------------------------------------------------------------------------------------------------------------------------------------------------------------------------------|------------------------|-----|----|-----|------|----------|---|--------|---------------------------------------------------------------------------------------------------------------------|
| DACOSTA UV RESPONSE VIA ERCC3 DN        | others    |                 |               | Genes down-regulated in fibroblasts expressing mutant forms of ERCC3 [Gene ID=2071] after UV irradiation.                                                                    | MSigDBv3.0 CGP         | 849 | 18 | 7.8 | 2.5  | 0.000811 | 1 | 0.0163 | COL1A2, COL5A2, CRIM1, CTGF, EPS8, FBXL7, FLNB, GJA1, HEG1, IL1R1, ITGA6, LRIG1, MYOF, NRG1, PODXL, SERPINE1, WWTR1 |
| COLLER MYC TARGETS DN                   | TF        | MYC             |               | Genes regulated by forced expression of MYC [Gene ID=4609] in 293T (transformed fetal renal cell).                                                                           | MSigDBv3.0 CGP         | 5   | 2  | 0   | 73   | 0.000819 | 1 | 0.0164 | COL3A1, CTGF                                                                                                        |
| VERNELL RETINOBLASTOMA PATHWAY DN       | TF        | RB, CDNK2A, E2F |               | Cluster 2: genes down-regulated by RB1 [Gene ID=5925], CDNK2A [Gene ID=1029], and one of the E2Fs (E2F1, E2F2, or E2F3 [Gene ID=1869, 1870, 1871]).                          | MSigDBv3.0 CGP         | 5   | 2  | 0   | 73   | 0.000819 | 1 | 0.0164 | CTGF, SERPINE1                                                                                                      |
| TGTTTGY V\$HNF3 Q6                      | TF        | FOXA            |               | Genes with promoter regions [-2kb,2kb] around transcription start site containing the motif TGTTTGY which matches annotation for FOXA1: forkhead box A1                      | MSigDBv3.0 TFT         | 573 | 14 | 5.2 | 2.9  | 0.000828 | 1 | 0.0165 | ADAM15, ALDH1A2, CTGF, FSTL1, GATA6, LPHN2, MMRN2, NOS3, NRG1, NTN1, ROBO4, SLC29A1, SLCO2A1, TJP1                  |
| CTGCAGY UNKNOWN                         | TF        | unknown         |               | Genes with promoter regions [-2kb,2kb] around transcription start site containing motif CTGCAGY. Motif does not match any known transcription factor                         | MSigDBv3.0 TFT         | 577 | 14 | 5.3 | 2.8  | 0.000886 | 1 | 0.0176 | ANGPTL2, CD151, CDH13, CRIM1, CRIP2, DPYSL3, DSTN, GATA6, MAGED1, NRG1, PPP2R5B, SERPINE1, SLCO2A1, TNXB            |
| MAHADEVAN IMATINIB RESISTANCE UP        | tumor     | resistance      | imatinib      | Top genes up-regulated in the GIST (gastrointestinal stromal tumor) cell line resistant to imatinib [PubChem=5291] compared to the parental cell line sensitive to the drug. | MSigDBv3.0 CGP         | 21  | 3  | 0.2 | 18.3 | 0.00089  | 1 | 0.0176 | CRIM1, DKK3, SERPINE2                                                                                               |
| KIM WT1 TARGETS 8HR UP                  | tumor     | other           |               | Genes up-regulated in UB27 cells (osteosarcoma) at 8 hr after inducing the expression of a mutant form of WT1 [Gene ID=7490].                                                | MSigDBv3.0 CGP         | 168 | 7  | 1.5 | 4.9  | 0.00092  | 1 | 0.0181 | EMP1, PLEC, PLXND1, PODXL, SERPINE1, TM4SF1, WWTR1                                                                  |
| BUYTAERT PHOTODYNAMIC THERAPY STRESS DN | tumor     | other           |               | Genes down-regulated in T24 (bladder cancer) cells in response to the photodynamic therapy (PDT) stress.                                                                     | MSigDBv3.0 CGP         | 647 | 15 | 5.9 | 2.7  | 0.000922 | 1 | 0.0181 | COL4A2, CRIM1, CTGF, EDN1, EFEMP1, FBN1, FN1, HYAL2, ID1, LOXL2, PLK2, SERPINE1, SSSCA1, SYNPO, VCAN                |
| ROSS ACUTE MYELOID LEUKEMIA CBF         | tumor     | other           |               | Top 100 probe sets for core-binding factor (CBF) acute myeloid leukemia (AML): contains CBFβ MYH11 [Gene ID=865, 4629] or AML1 ETO [Gene ID=861, 862] fusions.               | MSigDBv3.0 CGP         | 82  | 5  | 0.8 | 7.2  | 0.00094  | 1 | 0.0184 | CAV1, CD34, CRIP2, HYAL2, ITGB4                                                                                     |
| ZHOU INFLAMMATORY RESPONSE FIMA UP      | others    |                 |               | Genes up-regulated in macrophages by P.gingivalis FimA pathogen.                                                                                                             | MSigDBv3.0 CGP         | 516 | 13 | 4.7 | 2.9  | 0.000962 | 1 | 0.0187 | COL3A1, COL5A1, CXCR7, DPYSL3, EDN1, EFEMP1, FSCN1, IL1R1, ITGA9, LTBP4, POSTN, RHOJ, SERPINE1                      |
| ANGIOGENESIS                            | others    |                 |               | Genes annotated by the GO term GO:0001525. Blood vessel formation when new vessels emerge from the proliferation of pre-existing blood vessels.                              | MSigDBv3.0 BP          | 48  | 4  | 0.4 | 10   | 0.000966 | 1 | 0.0187 | CDH13, COL4A2, ROBO4, STAB1                                                                                         |
| HENDRICKS SMARCA4 TARGETS UP            | tumor     | other           |               | Genes up-regulated in ALAB cells (breast cancer) upon reintroduction of SMARCA4 [Gene ID=6597] expressed off adenoviral vector.                                              | MSigDBv3.0 CGP         | 48  | 4  | 0.4 | 10   | 0.000966 | 1 | 0.0187 | FLNB, LOXL2, PERP, SERPINE2                                                                                         |
| REACTOME APOPTOTIC EXECUTION PHASE      | signaling | apoptosis       |               | Genes involved in Apoptotic execution phase                                                                                                                                  | MSigDBv3.0 CP:REACTOME | 48  | 4  | 0.4 | 10   | 0.000966 | 1 | 0.0187 | PLEC, SPTAN1, TJP1, VIM                                                                                             |
| REACTOME HEMOSTASIS                     | others    |                 |               | Genes involved in Hemostasis                                                                                                                                                 | MSigDBv3.0 CP:REACTOME | 274 | 9  | 2.5 | 3.8  | 0.000977 | 1 | 0.0189 | CAV1, CD9, COL1A2, FN1, GAS6, ITGA6, ITGAV, SERPINE1, TEK                                                           |
| module 426                              | others    |                 |               | Genes in module_426                                                                                                                                                          | MSigDBv3.0 CM          | 83  | 5  | 0.8 | 7.1  | 0.000993 | 1 | 0.0191 | CD151, CDH5, FSCN1, GAS6, ITGB4                                                                                     |
| KIM WT1 TARGETS 12HR UP                 | tumor     | other           |               | Genes up-regulated in UB27 cells (osteosarcoma) at 12 hr after inducing the expression of a mutated form of WT1 [Gene ID=7490].                                              | MSigDBv3.0 CGP         | 171 | 7  | 1.6 | 4.8  | 0.00102  | 1 | 0.0195 | AQP1, EPS8, HEG1, MYOF, PODXL, SERPINE1, TM4SF1                                                                     |
| LU TUMOR ENDOTHELIAL MARKERS UP         | tumor     | other           |               | Genes specifically up-regulated in tumor endothelium.                                                                                                                        | MSigDBv3.0 CGP         | 22  | 3  | 0.2 | 17.4 | 0.00102  | 1 | 0.0195 | POSTN, TNFRSF21, VCAN                                                                                               |
| MEMBRANE FRACTION                       | ECM       | adhesion        | membrane      | Genes annotated by the GO term GO:0005624. That fraction of cells, prepared by disruptive biochemical methods, that includes the plasma and other membranes.                 | MSigDBv3.0 CC          | 333 | 10 | 3.1 | 3.5  | 0.00102  | 1 | 0.0195 | A4GALT, ATP1A1, CD151, CD59, CDH5, EMP1, SCARB2, SLC29A1, SLCO2A1, SPTAN1                                           |
| JAEGER METASTASIS UP                    | tumor     | other           | metastasis    | Genes up-regulated in metastases from malignant melanoma compared to the primary tumors.                                                                                     | MSigDBv3.0 CGP         | 49  | 4  | 0.4 | 9.8  | 0.00104  | 1 | 0.0199 | BGN, EPS8, FN1, SULF1                                                                                               |
| KESHELAVA MULTIPLE DRUG RESISTANCE      | tumor     | resistance      | multiple drug | Genes up-regulated in multiple drug resistant neuroblastoma cell lines.                                                                                                      | MSigDBv3.0 CGP         | 84  | 5  | 0.8 | 7    | 0.00105  | 1 | 0.0199 | ADAM15, CD151, CRIP2, FN1, HSPB1                                                                                    |
| ELVIDGE HYPOXIA UP                      | signaling | hypoxia         | breast cells  | Genes up-regulated in MCF7 cells (breast cancer) under hypoxia conditions.                                                                                                   | MSigDBv3.0 CGP         | 173 | 7  | 1.6 | 4.7  | 0.00109  | 1 | 0.0206 | CAV1, CD59, FLNB, GJA1, LOXL2, PTRF, SERPINE1                                                                       |
| BASSO HAIRY CELL LEUKEMIA DN            | tumor     | other           |               | Genes down-regulated in hairy cell leukemia (HCL) compared with normal and other neoplastic B cell populations.                                                              | MSigDBv3.0 CGP         | 85  | 5  | 0.8 | 6.9  | 0.00111  | 1 | 0.0208 | EMP1, ENG, IL1R1, MYOF, WWTR1                                                                                       |

|                                                   |           |            |                     |                                                                                                                                                                                                        |                        |     |    |     |      |         |   |                                                                                                                  |
|---------------------------------------------------|-----------|------------|---------------------|--------------------------------------------------------------------------------------------------------------------------------------------------------------------------------------------------------|------------------------|-----|----|-----|------|---------|---|------------------------------------------------------------------------------------------------------------------|
| NAKAYAMA SOFT TISSUE TUMORS PCA1 UP               | tumor     | other      |                     | Top 100 probe sets contributing to the positive side of the 1st principal component; predominantly associated with spindle cell and pleomorphic sarcoma samples.                                       | MSigDBv3.0 CGP         | 85  | 5  | 0.8 | 6.9  | 0.00111 | 1 | 0.0208 CFH, ECM1, EFEMP1, PLTP, SERPINE1                                                                         |
| SMID BREAST CANCER BASAL UP                       | tumor     | breast     | basal               | Genes up-regulated in basal subtype of breast cancer samles.                                                                                                                                           | MSigDBv3.0 CGP         | 659 | 15 | 6   | 2.7  | 0.00111 | 1 | 0.0208 CD59, COL4A2, CTGF, EDN1, ELN, FOXC1, FSCN1, GATA6, GPRC5B, ITGA6, PERP, S100A10, TM4SF1, TNFRSF21, WWTR1 |
| module 11                                         | others    |            |                     | Genes in module_11                                                                                                                                                                                     | MSigDBv3.0 CM          | 525 | 13 | 4.8 | 2.9  | 0.00112 | 1 | 0.021 AQP1, CDH11, CLEC3B, DPYSL3, FBXL7, GJA1, GPRC5B, IFI27, ITGA6, MAOA, PALM, RNASE1, VCAN                   |
| MULLIGHAN NPM1 MUTATED SIGNATURE 1 DN             | tumor     | other      |                     | The 'NPM1-mutated signature 1': genes down-regulated in pediatriac AML (acute myeloid leukemia) samples with mutated NPM1 [Gene ID=4869] compared to all AML cases with the intact gene.               | MSigDBv3.0 CGP         | 127 | 6  | 1.2 | 5.5  | 0.00112 | 1 | 0.021 CD34, HEG1, HSPB1, LTBP4, SPTAN1, TPPP3                                                                    |
| REACTOME SIGNALING IN IMMUNE SYSTEM               | others    |            |                     | Genes involved in Signaling in Immune system                                                                                                                                                           | MSigDBv3.0 CP:REACTOME | 338 | 10 | 3.1 | 3.4  | 0.00114 | 1 | 0.0213 CAV1, CD34, COL1A2, FN1, GAS6, ITGA6, ITGAV, PPP2R5B, PVRL2, TEK                                          |
| COULOUARN TEMPORAL TGFB1 SIGNATURE UP             | signaling | TGFB       |                     | 'Late-TGFB1 signature': genes overexpressed in primary hepatocytes at a late phase of TGFB1 [Gene ID=7040] treatment; is associated with a more invasive phenotype.                                    | MSigDBv3.0 CGP         | 86  | 5  | 0.8 | 6.8  | 0.00116 | 1 | 0.0215 CTGF, ITGA6, SERPINE1, SLC29A1, VIM                                                                       |
| KEGG HEMATOPOIETIC CELL LINEAGE                   | others    |            |                     | Hematopoietic cell lineage                                                                                                                                                                             | MSigDBv3.0 CP:KEGG     | 86  | 5  | 0.8 | 6.8  | 0.00116 | 1 | 0.0215 CD34, CD59, CD9, IL1R1, ITGA6                                                                             |
| ACEVEDO LIVER CANCER WITH H3K27ME3 UP             | tumor     | other      | H3K27me3            | Genes whose promoters display higher levels of histone H3 trimethylation mark at K27 (H3K27me3) in hepatocellular carcinoma (HCC) compared to normal liver.                                            | MSigDBv3.0 CGP         | 282 | 9  | 2.6 | 3.7  | 0.00119 | 1 | 0.022 COL1A2, COL3A1, GPR116, IL1RL1, MAGED1, PKHD1L1, PLA2G2A, RNASE1, SULF1                                    |
| module 85                                         | others    |            |                     | Genes in module_85                                                                                                                                                                                     | MSigDBv3.0 CM          | 51  | 4  | 0.5 | 9.4  | 0.00121 | 1 | 0.0222 EPHB4, LEPR, TEK, TIE1                                                                                    |
| DACOSTA LOW DOSE UV RESPONSE VIA ERCC3 XPCS DN    | others    |            |                     | Genes down-regulated in fibroblasts expressing the XP/CS mutant form of ERCC3 [Gene ID=2071], after low dose UVC irradiation.                                                                          | MSigDBv3.0 CGP         | 6   | 2  | 0.1 | 54.7 | 0.00122 | 1 | 0.0222 ID1, SERPINE1                                                                                             |
| module 496                                        | others    |            |                     | Genes in module_496                                                                                                                                                                                    | MSigDBv3.0 CM          | 6   | 2  | 0.1 | 54.7 | 0.00122 | 1 | 0.0222 IL1R1, IL1RL1                                                                                             |
| SMID BREAST CANCER RELAPSE IN PLEURA UP           | tumor     | breast     | metastasis          | Genes up-regulated in pleura relapse of breast cancer.                                                                                                                                                 | MSigDBv3.0 CGP         | 6   | 2  | 0.1 | 54.7 | 0.00122 | 1 | 0.0222 GJA1, TPPP3                                                                                               |
| WALLACE PROSTATE CANCER DN                        | tumor     | other      |                     | Genes down-regulated in prostate tumor vs normal tissue samples.                                                                                                                                       | MSigDBv3.0 CGP         | 6   | 2  | 0.1 | 54.7 | 0.00122 | 1 | 0.0222 GJA1, LAMA4                                                                                               |
| HOOI ST7 TARGETS UP                               | tumor     | other      |                     | Genes up-regulated in PC-3 cells (prostate cancer) stably expressing ST7 [Gene ID=7982] off a plasmid vector.                                                                                          | MSigDBv3.0 CGP         | 87  | 5  | 0.8 | 6.8  | 0.00123 | 1 | 0.0222 CDH11, FLNC, MEST, PODXL, SERPINE1                                                                        |
| V\$AREB6 03                                       | TF        | TCF8       |                     | Genes with promoter regions [-2kb,2kb] around transcription start site containing the motif VNRCACTGKNC which matches annotation for TCF8: transcription factor 8 (represses interleukin 2 expression) | MSigDBv3.0 TFT         | 177 | 7  | 1.6 | 4.6  | 0.00125 | 1 | 0.0225 DSTN, FLNB, ITGA6, ITGB4, KIF1C, MYH10, SEMA3F                                                            |
| SCHLESINGER METHYLATED DE NOVO IN CANCER          | tumor     | other      | H3K27me3, SUZ12/EED | Genes bearing H3K27me3 mark or whose promoters are bound by the polycomb proteins SUZ12 or EED [Gene ID=23512, 8726]; their DNA is methylated de novo in cancer.                                       | MSigDBv3.0 CGP         | 88  | 5  | 0.8 | 6.7  | 0.00129 | 1 | 0.0233 CDH13, CRIP1, FBN1, GATA4, SFRP5                                                                          |
| OSADA ASCL1 TARGETS DN                            | tumor     | other      |                     | Genes down-regulated in A549 cells (lung cancer) upon expression of ASCL1 [Gene ID=429] off a viral vector.                                                                                            | MSigDBv3.0 CGP         | 24  | 3  | 0.2 | 15.7 | 0.00133 | 1 | 0.0238 CRIM1, DKK3, NRG1                                                                                         |
| VALK AML WITH EVI1                                | tumor     | other      |                     | Genes that best predicted acute myeloid leukemia (AML) with the up-regulated expression of EVI1 [Gene ID=2122].                                                                                        | MSigDBv3.0 CGP         | 24  | 3  | 0.2 | 15.7 | 0.00133 | 1 | 0.0238 CD34, CRIM1, NPDC1                                                                                        |
| BECKER TAMOXIFEN RESISTANCE DN                    | tumor     | resistance | ER                  | Genes down-regulated in a breast cancer cell line resistant to tamoxifen [PubChem ID=5376] compared to the parental line sensitive to the drug.                                                        | MSigDBv3.0 CGP         | 53  | 4  | 0.5 | 9    | 0.0014  | 1 | 0.025 EMP1, GJA1, IL1R1, TM4SF1                                                                                  |
| module 234                                        | others    | bone       |                     | Genes in module_234: Bone remodeling                                                                                                                                                                   | MSigDBv3.0 CM          | 53  | 4  | 0.5 | 9    | 0.0014  | 1 | 0.025 CLEC3B, FBN1, POSTN, TIE1                                                                                  |
| LU TUMOR ANGIOGENESIS UP                          | tumor     | other      |                     | Up-regulated genes of putative pathways stimulated in tumor endothelial cells by papillary serous ovarian epithelial tumor cells.                                                                      | MSigDBv3.0 CGP         | 25  | 3  | 0.2 | 15   | 0.0015  | 1 | 0.0266 EDN1, ITGAV, VCAN                                                                                         |
| WATANABE RECTAL CANCER RADIOTHERAPY RESPONSIVE DN | tumor     | resistance |                     | Genes down-regulated in rectal cancer patients resistant to radiotherapy (non-responders) relative to the sensitive ones (responders).                                                                 | MSigDBv3.0 CGP         | 91  | 5  | 0.8 | 6.4  | 0.0015  | 1 | 0.0266 AGRN, COL1A2, COL3A1, COL5A2, ITGAV                                                                       |

|                                                     |           |          |                  |                                                                                                                                                                                                                                          |                        |     |    |     |      |         |   |        |                                                                                               |
|-----------------------------------------------------|-----------|----------|------------------|------------------------------------------------------------------------------------------------------------------------------------------------------------------------------------------------------------------------------------------|------------------------|-----|----|-----|------|---------|---|--------|-----------------------------------------------------------------------------------------------|
| NAKAMURA TUMOR ZONE PERIPHERAL VS CENTRAL DN        | tumor     | other    |                  | Down-regulated genes in peripheral zone of human pancreatic cancer growing in the pancreas of nude mice compared to that of the tumor from the central zone.                                                                             | MSigDBv3.0 CGP         | 611 | 14 | 5.6 | 2.7  | 0.00152 | 1 | 0.0269 | AGRN, APCDD1, CFH, COL6A1, CXCR7, FOXC1, IL1R1, IL1RL1, IL33, ITFG3, LOXL2, LRIG1, MAOA, MUC1 |
| CELLULAR COMPONENT ASSEMBLY                         | others    |          |                  | Genes annotated by the GO term GO:0022607. A cellular process that results in the assembly of a part of the cell.                                                                                                                        | MSigDBv3.0 BP          | 293 | 9  | 2.7 | 3.6  | 0.00155 | 1 | 0.0274 | AGRN, CD9, GJA1, HSPB1, ITGA6, PTRF, SLC9A3R2, TJP1, TNXB                                     |
| HUPER BREAST BASAL VS LUMINAL UP                    | tumor     | breast   | basal vs luminal | Genes up-regulated in basal mammary epithelial cells compared to the luminal ones.                                                                                                                                                       | MSigDBv3.0 CGP         | 55  | 4  | 0.5 | 8.7  | 0.00161 | 1 | 0.0282 | GJA1, ITGA6, POSTN, SERPINE2                                                                  |
| V\$FOXO4 01                                         | TF        | others   |                  | Genes with promoter regions [-2kb,2kb] around transcription start site containing the motif RWAACAANN which matches annotation for MLLT7: myeloid/lymphoid or mixed-lineage leukemia (trithorax homolog, Drosophila); translocated to, 7 | MSigDBv3.0 TFT         | 185 | 7  | 1.7 | 4.4  | 0.00161 | 1 | 0.0282 | ALDH1A2, FSTL1, GATA6, LPHN2, NRG1, PALM, TJP1                                                |
| VASCULATURE DEVELOPMENT                             | others    |          |                  | Genes annotated by the GO term GO:0001944. The process whose specific outcome is the progression of the vasculature over time, from its formation to the mature structure.                                                               | MSigDBv3.0 BP          | 55  | 4  | 0.5 | 8.7  | 0.00161 | 1 | 0.0282 | CDH13, COL4A2, ROBO4, STAB1                                                                   |
| DASU IL6 SIGNALING DN                               | signaling | IL6      |                  | Genes down-regulated in normal fibroblasts in response to IL6 [Gene ID=3569].                                                                                                                                                            | MSigDBv3.0 CGP         | 7   | 2  | 0.1 | 43.8 | 0.0017  | 1 | 0.0296 | SERPINE1, SULF1                                                                               |
| HOQUE METHYLATED IN CANCER                          | tumor     | other    |                  | Genes whose DNA was methylated both in primary tumors and across a panel of cancer cell lines.                                                                                                                                           | MSigDBv3.0 CGP         | 56  | 4  | 0.5 | 8.5  | 0.00172 | 1 | 0.03   | CDH13, GATA4, SFRP5, VCAN                                                                     |
| CELL FRACTION                                       | others    |          |                  | Genes annotated by the GO term GO:0000267. A generic term for parts of cells prepared by disruptive biochemical techniques.                                                                                                              | MSigDBv3.0 CC          | 485 | 12 | 4.4 | 2.9  | 0.00175 | 1 | 0.0303 | A4GALT, ANXA2, ATP1A1, CD151, CD59, CDH5, EDN1, EMP1, SCARB2, SLC29A1, SLC02A1, SPTAN1        |
| module 223                                          | others    |          |                  | Genes in module_223: Immune (defense) response                                                                                                                                                                                           | MSigDBv3.0 CM          | 140 | 6  | 1.3 | 5    | 0.00185 | 1 | 0.032  | CRIP1, EDN1, EMP1, EPS8, GAS6, MDK                                                            |
| SENESE HDAC3 TARGETS UP                             | tumor     | other    |                  | Genes up-regulated in U2OS cells (osteosarcoma) upon knockdown of HDAC3 [Gene ID=8841] by RNAi.                                                                                                                                          | MSigDBv3.0 CGP         | 489 | 12 | 4.5 | 2.8  | 0.00187 | 1 | 0.032  | DPYSL3, EMP1, FN1, FOXC1, ITGA6, LEPR, PTPRB, RHOC, ROBO4, SCARB2, SERPINE2, TM4SF1           |
| GUENTHER GROWTH SPHERICAL VS ADHERENT DN            | tumor     | other    |                  | Genes down-regulated in glioblastoma cell lines displaying spherical growth (cluster-1) compared to those displaying semiaherent or adherent growth phenotype (cluster-2).                                                               | MSigDBv3.0 CGP         | 27  | 3  | 0.2 | 13.7 | 0.00188 | 1 | 0.032  | CAV1, CD59, FN1                                                                               |
| HAHTOLA MYCOSIS FUNGOIDES SKIN DN                   | others    |          |                  | Genes down-regulated in lesional skin biopsies from mycosis fungoides patients compared to the normal skin samples.                                                                                                                      | MSigDBv3.0 CGP         | 27  | 3  | 0.2 | 13.7 | 0.00188 | 1 | 0.032  | DSTN, ECM1, ITGA6                                                                             |
| module 265                                          | signaling | IL       | receptor         | Genes in module_265: IL receptors                                                                                                                                                                                                        | MSigDBv3.0 CM          | 27  | 3  | 0.2 | 13.7 | 0.00188 | 1 | 0.032  | IL1R1, IL1RL1, LEPR                                                                           |
| NAKAMURA CANCER MICROENVIRONMENT UP                 | tumor     | other    |                  | Genes up-regulated in pancreatic cancer cells grown in orthotopic xenograft tumors compared to those grown in vitro.                                                                                                                     | MSigDBv3.0 CGP         | 27  | 3  | 0.2 | 13.7 | 0.00188 | 1 | 0.032  | COL1A2, COL3A1, POSTN                                                                         |
| SAKAI TUMOR INFILTRATING MONOCYTES UP               | others    |          |                  | Selected genes up-regulated in inflammatory monocytes infiltrating hepatocellular carcinoma (HCC).                                                                                                                                       | MSigDBv3.0 CGP         | 27  | 3  | 0.2 | 13.7 | 0.00188 | 1 | 0.032  | FLNB, ITGA9, NRG1                                                                             |
| HELLER SILENCED BY METHYLATION UP                   | tumor     | other    |                  | Genes up-regulated in at least one of three multiple myeloma (MM) cell lines treated with the DNA hypomethylating agent decitabine (5-aza-2'-deoxycytidine) [PubChem=451668].                                                            | MSigDBv3.0 CGP         | 245 | 8  | 2.2 | 3.8  | 0.00193 | 1 | 0.0326 | AGRN, CDH11, FBN1, FSCN1, ID1, IFI27, MUC1, SYNPO                                             |
| UDAYAKUMAR MED1 TARGETS DN                          | tumor     | other    |                  | Genes down-regulated in HeLa cells after knockdown of MED1 [Gene ID=5469] by RNAi.                                                                                                                                                       | MSigDBv3.0 CGP         | 245 | 8  | 2.2 | 3.8  | 0.00193 | 1 | 0.0326 | ADAMTS1, BMP6, CXCR7, EPHB4, NFE2L1, PLK2, RHOC, SPTAN1                                       |
| V\$E12 Q6                                           | TF        | TCF3     |                  | Genes with promoter regions [-2kb,2kb] around transcription start site containing the motif RRCAGGTGNCV which matches annotation for TCF3: transcription factor 3 (E2A immunoglobulin enhancer binding factors E12/E47)                  | MSigDBv3.0 TFT         | 191 | 7  | 1.7 | 4.2  | 0.00193 | 1 | 0.0326 | ALDH1A2, BMP6, CDH5, ITGA6, ITGB4, SEMA3F, TNFRSF21                                           |
| AMIT SERUM RESPONSE 60 MCF10A                       | signaling | serum    | MCF10A           | Genes whose expression peaked at 60 min after stimulation of MCF10A cells with serum.                                                                                                                                                    | MSigDBv3.0 CGP         | 58  | 4  | 0.5 | 8.2  | 0.00196 | 1 | 0.033  | CTGF, FN1, PLK2, TM4SF1                                                                       |
| REACTOME CELL CELL ADHESION SYSTEMS                 | ECM       | adhesion |                  | Genes involved in Cell-cell adhesion systems                                                                                                                                                                                             | MSigDBv3.0 CP:REACTOME | 58  | 4  | 0.5 | 8.2  | 0.00196 | 1 | 0.033  | CDH11, CDH13, CDH5, PVRL2                                                                     |
| FLECHNER BIOPSY KIDNEY TRANSPLANT REJECTED VS OK DN | others    |          |                  | Genes differentially expressed in kidney biopsies from patients with acute transplant rejection compared to the biopsies from patients with well functioning kidneys more than 1-year post transplant.                                   | MSigDBv3.0 CGP         | 560 | 13 | 5.1 | 2.7  | 0.00199 | 1 | 0.0334 | AQP1, CD9, DSTN, EPS8, GPR116, HSPB1, ITGA6, MAOA, MYH10, PLS3, PODXL, TEK, WWTR1             |
| V\$LMO2COM 02                                       | TF        | others   |                  | Genes with promoter regions [-2kb,2kb] around transcription start site containing the motif NMGATANSNG which matches annotation for LMO2: LIM domain only 2 (rhombotin-like 1)                                                           | MSigDBv3.0 TFT         | 193 | 7  | 1.8 | 4.2  | 0.00204 | 1 | 0.0342 | BMP6, CD34, CDH5, GATA6, MYH10, PVRL2, SFRP5                                                  |

|                                            |           |          |            |                                                                                                                                                                                                                                                                                                                               |                |      |    |      |      |         |   |        |                                                                                                                                                               |
|--------------------------------------------|-----------|----------|------------|-------------------------------------------------------------------------------------------------------------------------------------------------------------------------------------------------------------------------------------------------------------------------------------------------------------------------------|----------------|------|----|------|------|---------|---|--------|---------------------------------------------------------------------------------------------------------------------------------------------------------------|
| GRADE COLON VS RECTAL CANCER UP module 385 | tumor     | other    |            | Genes up-regulated in rectal but down-regulated in colon carcinoma compared to normal mucosa samples.                                                                                                                                                                                                                         | MSigDBv3.0 CGP | 28   | 3  | 0.3  | 13.2 | 0.00209 | 1 | 0.0348 | CD34, FSTL1, GPR116                                                                                                                                           |
|                                            | others    |          |            | Genes in module_385: Heparin binding                                                                                                                                                                                                                                                                                          | MSigDBv3.0 CM  | 28   | 3  | 0.3  | 13.2 | 0.00209 | 1 | 0.0348 | FN1, FSTL1, MDK                                                                                                                                               |
| RHEIN ALL GLUCOCORTICOID THERAPY DN        | tumor     | other    |            | Genes down-regulated in ALL (acute lymphoblastic leukemia) blasts after 1 week of treatment with glucocorticoids.                                                                                                                                                                                                             | MSigDBv3.0 CGP | 367  | 10 | 3.4  | 3.2  | 0.0021  | 1 | 0.0348 | CD34, CD9, EMP1, HSPB1, IGFBP7, LRIG1, MAGED1, MEST, MYH10, SERPINE1                                                                                          |
| V\$FOXO1 01                                | TF        | FOXO1A   |            | Genes with promoter regions [-2kb,2kb] around transcription start site containing the motif NRWAAACAAN which matches annotation for FOXO1A: forkhead box O1A (rhabdomyosarcoma)                                                                                                                                               | MSigDBv3.0 TFT | 194  | 7  | 1.8  | 4.2  | 0.0021  | 1 | 0.0348 | EFEMP1, EMP1, FSTL1, GATA6, LPHN2, NRG1, PALM                                                                                                                 |
| YAGI AML FAB MARKERS                       | tumor     | other    |            | Genes specifically expressed in FAB subtypes M2, M4, M5 and M7 of pediatric AML (acute myeloid leukemia).                                                                                                                                                                                                                     | MSigDBv3.0 CGP | 195  | 7  | 1.8  | 4.2  | 0.00216 | 1 | 0.0357 | ANXA2, CAV1, CFH, ITGA6, MYH10, S100A10, SERPINE2                                                                                                             |
| GAUTSCHI SRC SIGNALING                     | tumor     | other    | AZD0530    | Genes down-regulated in A549 cells (lung cancer) after treatment with AZD0530 [PubChem=10302451], a SRC [Gene ID=6714] kinase inhibitor.                                                                                                                                                                                      | MSigDBv3.0 CGP | 8    | 2  | 0.1  | 36.5 | 0.00225 | 1 | 0.0371 | ID1, SERPINE1                                                                                                                                                 |
| KAAB FAILED HEART ATRIUM DN                | others    |          |            | Genes down-regulated in atria of failing hearts (DCM and ICM) compared to healthy controls.                                                                                                                                                                                                                                   | MSigDBv3.0 CGP | 146  | 6  | 1.3  | 4.8  | 0.00228 | 1 | 0.0375 | CD59, LRRC32, MYH10, PODXL, PSMD9, PTPRB                                                                                                                      |
| GAUSSMANN MLL AF4 FUSION TARGETS D UP      | others    |          |            | Up-regulated genes from the set D (Fig. 5a): specific signature shared by cells expressing MLL-AF4 [Gene ID=4297, 4299] alone and those expressing both MLL-AF4 and AF4-MLL fusion proteins.                                                                                                                                  | MSigDBv3.0 CGP | 29   | 3  | 0.3  | 12.7 | 0.00232 | 1 | 0.038  | LOXL2, PERP, SERPINE2                                                                                                                                         |
| ONKEN UVEAL MELANOMA UP                    | tumor     | other    |            | Genes up-regulated in uveal melanoma: class 2 vs class 1 tumors.                                                                                                                                                                                                                                                              | MSigDBv3.0 CGP | 785  | 16 | 7.2  | 2.4  | 0.00236 | 1 | 0.0385 | CDC42BPB, COL1A2, COL6A1, CXCR7, EMP1, FBXL7, FLNC, GOLM1, IGFBP7, ITGA6, MMP2, MYOF, PLTP, SPTAN1, SYNPO, WWTR1                                              |
| SKELETAL DEVELOPMENT                       | others    |          |            | Genes annotated by the GO term GO:0001501. The process whose specific outcome is the progression of the skeleton over time, from its formation to the BP mature structure. The skeleton is the bony framework of the body in vertebrates (endoskeleton) or the hard outer envelope of insects (exoskeleton or dermoskeleton). | MSigDBv3.0     | 101  | 5  | 0.9  | 5.8  | 0.00237 | 1 | 0.0387 | ANXA2, CLEC3B, COL1A2, FBN1, POSTN                                                                                                                            |
| module 64                                  | ECM       | adhesion | receptor   | Genes in module_64: Membranal receptors                                                                                                                                                                                                                                                                                       | MSigDBv3.0 CM  | 506  | 12 | 4.6  | 2.7  | 0.00248 | 1 | 0.0402 | AQP1, CAV1, CD9, GJA1, GPRC5B, IL1R1, LEPR, LRRC32, MUC1, NRG1, TEK, TNFRSF21                                                                                 |
| TGACCTY V\$ERR1 Q2                         | TF        | ESRRA    | ER         | Genes with promoter regions [-2kb,2kb] around transcription start site containing the motif TGACCTY which matches annotation for ESRRA: estrogen-related receptor alpha                                                                                                                                                       | MSigDBv3.0 TFT | 789  | 16 | 7.2  | 2.4  | 0.00248 | 1 | 0.0402 | ADAM15, CDH13, FAM38A, FSTL1, KIF1C, LAMB2, LTBP3, NFE2L1, NRG1, PLXND1, SEMA3F, SLCO2A1, SPTAN1, SYNPO, TEK, TNXB                                            |
| HAN SATB1 TARGETS UP                       | tumor     | other    |            | Genes up-regulated in MDA-MB-231 cells (breast cancer) after knockdown of SATB1 [Gene ID=6304] by RNAi.                                                                                                                                                                                                                       | MSigDBv3.0 CGP | 315  | 9  | 2.9  | 3.3  | 0.00254 | 1 | 0.0411 | ADAM15, ADAMTS1, CDH11, COL6A2, CTGF, FN1, GATA6, IGFBP7, NRG1                                                                                                |
| ALONSO METASTASIS EMT UP                   | EMT       | tumor    | metastasis | EMT (epithelial-mesenchymal transition) genes up-regulated genes in melanoma tumous that developed metastatic disease compared to primary melanoma that did not.                                                                                                                                                              | MSigDBv3.0 CGP | 30   | 3  | 0.3  | 12.2 | 0.00256 | 1 | 0.0411 | EMP1, ITGAV, MMP2                                                                                                                                             |
| GILDEA METASTASIS                          | tumor     | other    |            | Top genes down-regulated in metastatic (T24T) vs non-metastatic (T24) bladder cancer cell lines.                                                                                                                                                                                                                              | MSigDBv3.0 CGP | 30   | 3  | 0.3  | 12.2 | 0.00256 | 1 | 0.0411 | COL5A2, FN1, IFI27                                                                                                                                            |
| VALK AML CLUSTER 13                        | tumor     | other    |            | Top 40 genes from cluster 13 of acute myeloid leukemia (AML) expression profile; 91% of the samples are FAB M2 subtype, all bear the t(8;21) translocation producing the AML1-ETO fusion [Gene ID=861, 862]; indicate good survival.                                                                                          | MSigDBv3.0 CGP | 30   | 3  | 0.3  | 12.2 | 0.00256 | 1 | 0.0411 | CAV1, HSPG2, ITGB4                                                                                                                                            |
| ELVIDGE HIF1A AND HIF2A TARGETS DN         | tumor     | other    | hypoxia    | Genes down-regulated in MCF7 cells (breast cancer) after knockdown of both HIF1A and HIF2A [Gene ID=3091, 2034] by RNAi.                                                                                                                                                                                                      | MSigDBv3.0 CGP | 104  | 5  | 1    | 5.6  | 0.0027  | 1 | 0.0432 | CAV1, GJA1, LOXL2, PTRF, SERPINE1                                                                                                                             |
| TGGAAA V\$NFAT Q4 01                       | TF        | NFAT     |            | Genes with promoter regions [-2kb,2kb] around transcription start site containing the motif TGGAAA which matches annotation for NFAT&lt;br&gt;NFATC                                                                                                                                                                           | MSigDBv3.0 TFT | 1426 | 24 | 13.1 | 2    | 0.00276 | 1 | 0.044  | ANGPTL2, BMP6, CCDC3, CDH5, COL1A2, CTGF, DKK2, DSTN, EMP1, FLNC, FN1, FSTL1, GATA6, HSPG2, HYAL2, IGFBP7, MRC2, NRG1, PTRF, RBMS2, S100A10, SULF1, TNXB, VIM |
| TATAAA V\$TATA 01                          | TF        | others   |            | Genes with promoter regions [-2kb,2kb] around transcription start site containing the motif TATAAA which matches annotation for TAF&lt;br&gt;TATA                                                                                                                                                                             | MSigDBv3.0 TFT | 1026 | 19 | 9.4  | 2.2  | 0.00277 | 1 | 0.0442 | ADAMTS1, ALDH1A2, AQP1, CCDC3, COL1A2, CTGF, DKK2, DSTN, ECM1, EDN1, EFEMP1, FN1, ID1, PLTP, POSTN, SERPINE1, SLCO2A1, SPTAN1, SULF1                          |
| ST WNT BETA CATENIN PATHWAY                | signaling | WNT      |            | Wnt/beta-catenin Pathway                                                                                                                                                                                                                                                                                                      | MSigDBv3.0 CP  | 31   | 3  | 0.3  | 11.8 | 0.00281 | 1 | 0.0447 | DKK2, DKK3, FSTL1                                                                                                                                             |
| WAMUNYOKOLI OVARIAN CANCER GRADES 1 2 DN   | tumor     | other    |            | Genes down-regulated in mucinous ovarian carcinoma tumors of grades 1 and 2 compared to the normal ovarian survace epithelium tissue.                                                                                                                                                                                         | MSigDBv3.0 CGP | 64   | 4  | 0.6  | 7.4  | 0.00282 | 1 | 0.0447 | CAV1, IL1R1, PODXL, SULF1                                                                                                                                     |
| V\$CACCCBINDINGFACT OR Q6                  | TF        | unknown  |            | Genes with promoter regions [-2kb,2kb] around transcription start site containing motif CANCCNNWGGGTGDGG. Motif does not match any known transcription factor                                                                                                                                                                 | MSigDBv3.0 TFT | 205  | 7  | 1.9  | 3.9  | 0.00286 | 1 | 0.0453 | FLNC, ITGB4, NRG1, PLS3, PLTP, SERPINE1, SULF1                                                                                                                |

|                                                            |        |            |                      |                                                                                                                                                                                                                                                                                                                                                                                                                                                                        |                               |      |    |      |      |         |   |        |                                                                                                                                                                                                                                                  |
|------------------------------------------------------------|--------|------------|----------------------|------------------------------------------------------------------------------------------------------------------------------------------------------------------------------------------------------------------------------------------------------------------------------------------------------------------------------------------------------------------------------------------------------------------------------------------------------------------------|-------------------------------|------|----|------|------|---------|---|--------|--------------------------------------------------------------------------------------------------------------------------------------------------------------------------------------------------------------------------------------------------|
| TSUNODA CISPLATIN RESISTANCE UP                            | tumor  | resistance | cisplatin            | Genes up-regulated in bladder cancer cells resistant to cisplatin [PubChem=2767] compared to the parental cells sensitive to the drug.                                                                                                                                                                                                                                                                                                                                 | MSigDBv3.0 CGP                | 9    | 2  | 0.1  | 31.3 | 0.00288 | 1 | 0.0454 | CTGF, EFEMP1                                                                                                                                                                                                                                     |
| VŠZIC3 01                                                  | TF     | others     |                      | Genes with promoter regions [-2kb,2kb] around transcription start site containing the motif NGGGKGGTC which matches annotation for ZIC3: Zic family member 3 heterotaxy 1 (odd-paired homolog, Drosophila)                                                                                                                                                                                                                                                             | MSigDBv3.0 TFT                | 206  | 7  | 1.9  | 3.9  | 0.00294 | 1 | 0.0463 | ADAMTS1, ANGPTL2, DOCK6, FSTL1, NRG1, NTN1, SULF1                                                                                                                                                                                                |
| CROMER METASTASIS DN                                       | tumor  | other      | metastasis           | Metastatic propensity markers of head and neck squamous cell carcinoma (HNSCC): down-regulated in metastatic vs non-metastatic tumors.                                                                                                                                                                                                                                                                                                                                 | MSigDBv3.0 CGP                | 65   | 4  | 0.6  | 7.2  | 0.00298 | 1 | 0.0467 | CAV1, FLNB, ITGB4, PLEC                                                                                                                                                                                                                          |
| KANG BONE DN                                               | tumor  | breast     | metastasis           | kang cancerCell 2003 down in breast cancer likely to metastasize to bone                                                                                                                                                                                                                                                                                                                                                                                               | kang cancerCell 2003 mmc8.xls | 65   | 4  | 0.6  | 7.2  | 0.00298 | 1 | 0.0467 | COL5A1, FN1, ITGB4, LAMB1                                                                                                                                                                                                                        |
| ENK UV RESPONSE EPIDERMIS DN                               | others |            |                      | Genes down-regulated in epidermis after to UVB irradiation.                                                                                                                                                                                                                                                                                                                                                                                                            | MSigDBv3.0 CGP                | 519  | 12 | 4.8  | 2.7  | 0.00305 | 1 | 0.0477 | ADAMTS1, CRIP1, DKK3, EMP1, FSCN1, GAS6, HSPB1, ITGAV, POSTN, PVRL2, SPTAN1, TPPP3                                                                                                                                                               |
| EXTRACELLULAR STRUCTURE ORGANIZATION AND BIOGENESIS        | others |            |                      | Genes annotated by the GO term GO:0043062. A process that is carried out at the cellular level which results in the formation, arrangement of constituent parts, or disassembly of structures in the space external to the outermost structure of a cell. For cells without external protective or external encapsulating structures this refers to space outside of the plasma membrane, and also covers the host cell environment outside an intracellular parasite. | MSigDBv3.0 BP                 | 32   | 3  | 0.3  | 11.4 | 0.00308 | 1 | 0.0478 | AGRN, COL5A2, TNXB                                                                                                                                                                                                                               |
| GNF2 MMP1                                                  | EMT    | gene       | MMP                  | Neighborhood of MMP1                                                                                                                                                                                                                                                                                                                                                                                                                                                   | MSigDBv3.0 CGN                | 32   | 3  | 0.3  | 11.4 | 0.00308 | 1 | 0.0478 | FBN1, LOXL2, SERPINE1                                                                                                                                                                                                                            |
| VALK AML CLUSTER 10                                        | tumor  | other      |                      | Top 40 genes from cluster 10 of acute myeloid leukemia (AML) expression profile; 41% of the samples are FAB M1 subtype, 45% have up-regulated EVI1 [Gene ID=2122] expression; indicate poor survival.                                                                                                                                                                                                                                                                  | MSigDBv3.0 CGP                | 32   | 3  | 0.3  | 11.4 | 0.00308 | 1 | 0.0478 | CRIM1, FLNB, NPDC1                                                                                                                                                                                                                               |
| SHAFFER IRF4 TARGETS IN PLASMA CELL VS MATURE B LYMPHOCYTE | others |            |                      | IRF4 [Gene ID=3662] target genes up-regulated in plasma cells compared to mature B lymphocytes.                                                                                                                                                                                                                                                                                                                                                                        | MSigDBv3.0 CGP                | 66   | 4  | 0.6  | 7.1  | 0.00315 | 1 | 0.0488 | BMP6, CAV1, HSPB1, TXNDC5                                                                                                                                                                                                                        |
| module 63                                                  | others |            |                      | Genes in module_63: Porins/transporters                                                                                                                                                                                                                                                                                                                                                                                                                                | MSigDBv3.0 CM                 | 210  | 7  | 1.9  | 3.8  | 0.00327 | 1 | 0.0505 | GJA1, GPRC5B, HYL2, ITGA9, TEK, TIE1, TNFRSF21                                                                                                                                                                                                   |
| FRIDMAN IMMORTALIZATION DN                                 | others |            |                      | Genes down-regulated in immortalized cell lines.                                                                                                                                                                                                                                                                                                                                                                                                                       | MSigDBv3.0 CGP                | 33   | 3  | 0.3  | 11   | 0.00337 | 1 | 0.0519 | CTGF, IGFBP7, SERPINE1                                                                                                                                                                                                                           |
| GOZGIT ESR1 TARGETS DN                                     | tumor  | other      | ER                   | Genes down-regulated in TMX2-28 cells (breast cancer) which do not express ESR1 [Gene ID=2099] compared to the parental MCF7 cells which do.                                                                                                                                                                                                                                                                                                                           | MSigDBv3.0 CGP                | 741  | 15 | 6.8  | 2.4  | 0.00343 | 1 | 0.0527 | COL3A1, CXCR7, EDN1, EFEMP1, GATA6, HMCN1, IFI27, ITGA6, MAGED1, MAOA, PLK2, PVRL2, RBMS2, RNASE1, SULF1                                                                                                                                         |
| ACEVEDO METHYLATED IN LIVER CANCER UP                      | tumor  | other      |                      | Genes whose DNA is hypo-methylated in hepatocellular carcinoma (HCC) compared to normal liver.                                                                                                                                                                                                                                                                                                                                                                         | MSigDBv3.0 CGP                | 2227 | 33 | 20.4 | 1.8  | 0.00349 | 1 | 0.0536 | A4GALT, ANO1, ANXA2, ARHGAP23, CD34, CDC42BPB, CGNL1, COL1A2, COL3A1, COL4A2, COL6A2, DSTN, FAM38A, FBN1, FGD5, FN1, GAS6, GPRC5B, HEG1, HMCN1, ITFG3, KIF1C, LAMB1, LTBP3, LTBP4, PKHD1L1, PLEC, PLS3, PLXND1, SERPINE2, SFRP5, SLC29A1, SPTAN1 |
| CORRE MULTIPLE MYELOMA UP                                  | tumor  | other      |                      | Genes up-regulated in multiple myeloma (MM) bone marrow mesenchymal stem cells.                                                                                                                                                                                                                                                                                                                                                                                        | MSigDBv3.0 CGP                | 68   | 4  | 0.6  | 6.9  | 0.00351 | 1 | 0.0537 | GATA6, PTGIS, RHOJ, SERPINE1                                                                                                                                                                                                                     |
| CERVERA SDHB TARGETS 2                                     | tumor  | other      |                      | Genes present but differentially expressed between Hep3B cells (hepatocellular carcinoma, HCC) with RNAi knockdown of SDHB [Gene ID=6390] and control cells.                                                                                                                                                                                                                                                                                                           | MSigDBv3.0 CGP                | 111  | 5  | 1    | 5.2  | 0.00357 | 1 | 0.0544 | GJA1, GPRC5B, IGFBP7, LEPR, SERPINE2                                                                                                                                                                                                             |
| MCCOLLUM GELDANAMYCIN RESISTANCE UP                        | tumor  | resistance | geldanamycin, 17-AAG | Genes up-regulated in A549GARS cells (lung cancer) resistant to the geldanamycin and 17-AAG [PubChem=5476289, 6440175].                                                                                                                                                                                                                                                                                                                                                | MSigDBv3.0 CGP                | 10   | 2  | 0.1  | 27.3 | 0.00358 | 1 | 0.0544 | CDH11, SEMA3F                                                                                                                                                                                                                                    |
| POSITIVE REGULATION OF CELL MIGRATION                      | EMT    | migration  |                      | Genes annotated by the GO term GO:0030335. Any process that activates or increases the frequency, rate or extent of cell migration.                                                                                                                                                                                                                                                                                                                                    | MSigDBv3.0 BP                 | 10   | 2  | 0.1  | 27.3 | 0.00358 | 1 | 0.0544 | CDH13, LAMB1                                                                                                                                                                                                                                     |
| DOANE BREAST CANCER CLASSES DN                             | tumor  | breast     | ER                   | Genes down-regulated in ER(-) / PR(-) breast tumors (do not express ESR1 and PGR [Gene ID=2099, 5241]) with molecular similarity to ER(+) (class A) relative to the rest of the ER(-) / PR(-) samples (class B).                                                                                                                                                                                                                                                       | MSigDBv3.0 CGP                | 34   | 3  | 0.3  | 10.6 | 0.00367 | 1 | 0.0555 | FOXC1, FSCN1, WWTR1                                                                                                                                                                                                                              |
| LI CISPLATIN RESISTANCE DN                                 | tumor  | resistance | cisplatin            | Genes consistently down-regulated in ACRP cells (ovarian cancer, resistant to cisplatin [PubChem=2767]) compared to the parental sensitive A2780 cells, regardless of cisplatin exposure.                                                                                                                                                                                                                                                                              | MSigDBv3.0 CGP                | 34   | 3  | 0.3  | 10.6 | 0.00367 | 1 | 0.0555 | CFH, LAMA4, MEST                                                                                                                                                                                                                                 |
| module 69                                                  | others |            |                      | Genes in module_69                                                                                                                                                                                                                                                                                                                                                                                                                                                     | MSigDBv3.0 CM                 | 464  | 11 | 4.2  | 2.7  | 0.00373 | 1 | 0.0564 | CD9, CDH13, CDH5, EDN1, GJA1, HYL2, IFI27, IL1RL1, KIAA1522, PLA2G2A, SCARA3                                                                                                                                                                     |

|                                                                        |              |                     |            |                                                                                                                                                                                                                                                                                                                                             |                |     |    |     |      |         |   |        |                                                                                            |
|------------------------------------------------------------------------|--------------|---------------------|------------|---------------------------------------------------------------------------------------------------------------------------------------------------------------------------------------------------------------------------------------------------------------------------------------------------------------------------------------------|----------------|-----|----|-----|------|---------|---|--------|--------------------------------------------------------------------------------------------|
| V\$AP1 Q2                                                              | TF           | JUN                 |            | Genes with promoter regions [-2kb,2kb] around transcription start site containing the motif RSTGACTNANW which matches annotation for JUN: jun oncogene                                                                                                                                                                                      | MSigDBv3.0 TFT | 216 | 7  | 2   | 3.7  | 0.00382 | 1 | 0.0575 | DKK2, DSTN, FLNC, ID1, LTBP3, MAGED1, VIM                                                  |
| CTACCTC,LET-7A,LET-7B,LET-7C,LET-7D,LET-7E,LET-7F,MIR-98,LET-7G,LET-7I | microRNA     |                     |            | Targets of MicroRNA CTACCTC,LET-7A,LET-7B,LET-7C,LET-7D,LET-7E,LET-7F,MIR-98,LET-7G,LET-7I                                                                                                                                                                                                                                                  | MSigDBv3.0 MIR | 337 | 9  | 3.1 | 3.1  | 0.00396 | 1 | 0.0595 | ADAM15, CGNL1, COL1A2, COL3A1, COL5A2, DKK3, LRIG1, PLXND1, SEMA3F                         |
| SIG REGULATION OF THE ACTIN CYTOSKELETON BY RHO GTPASES                | cytoskeleton |                     |            | Genes related to regulation of the actin cytoskeleton                                                                                                                                                                                                                                                                                       | MSigDBv3.0 CP  | 35  | 3  | 0.3 | 10.3 | 0.00399 | 1 | 0.0596 | ANGPTL2, FLNC, FSCN1                                                                       |
| VALK AML CLUSTER 6                                                     | tumor        | other               |            | Top 40 genes from cluster 6 of acute myeloid leukemia (AML) expression profile; all samples are FAB M1 or M2 subtypes and all samples have internal tandem duplication of FLT3 [Gene ID=2322].                                                                                                                                              | MSigDBv3.0 CGP | 35  | 3  | 0.3 | 10.3 | 0.00399 | 1 | 0.0596 | CFH, DPYSL3, FOXC1                                                                         |
| SMIRNOV CIRCULATING ENDOTHELIOCYTES IN CANCER UP                       | tumor        | other               |            | Genes up-regulated in circulating endothelial cells (CEC) from cancer patients compared to those from healthy donors.                                                                                                                                                                                                                       | MSigDBv3.0 CGP | 164 | 6  | 1.5 | 4.2  | 0.00406 | 1 | 0.0605 | CD9, DKK3, ENG, NRG1, PERP, TIE1                                                           |
| NEWMAN ERCC6 TARGETS DN                                                | others       |                     |            | Genes down-regulated in Cockayne syndrome fibroblasts rescued by expression of ERCC6 [Gene ID=2074] off a plasmid vector.                                                                                                                                                                                                                   | MSigDBv3.0 CGP | 36  | 3  | 0.3 | 10   | 0.00432 | 1 | 0.0643 | ADAMTS1, PODXL, SERPINE1                                                                   |
| HOEGERKORP CD44 TARGETS DIRECT DN                                      | others       |                     |            | Genes directly down-regulated by CD44 [Gene ID=960] stimulation of B lymphocytes.                                                                                                                                                                                                                                                           | MSigDBv3.0 CGP | 11  | 2  | 0.1 | 24.3 | 0.00435 | 1 | 0.0645 | BCAM, PALM                                                                                 |
| KIM WT1 TARGETS 12HR DN                                                | tumor        | other               |            | Genes down-regulated in UB27 cells (osteosarcoma) at 12 hr after inducing the expression of a mutated form of WT1 [Gene ID=7490].                                                                                                                                                                                                           | MSigDBv3.0 CGP | 222 | 7  | 2   | 3.6  | 0.00443 | 1 | 0.0657 | CRIM1, CTGF, CXCR7, IGFBP7, LAMB1, NRG1, PLK2                                              |
| TRANSMEMBRANE RECEPTOR ACTIVITY                                        | ECM          | adhesion            | receptor   | Genes annotated by the GO term GO:0004888. Combining with an extracellular or intracellular messenger to initiate a change in cell activity, and spanning to the membrane of either the cell or an organelle.                                                                                                                               | MSigDBv3.0 MF  | 409 | 10 | 3.7 | 2.8  | 0.00454 | 1 | 0.067  | BCAM, CRIM1, GPR116, IL1R1, LPHN2, PTPRB, SCARA3, STAB1, TEK, TIE1                         |
| VANTVEER BREAST CANCER ESR1 DN                                         | tumor        | breast              | ER         | Down-regulated genes from the optimal set of 550 markers discriminating breast cancer samples by ESR1 [Gene ID=2099] expression: ER(+) vs ER(-) tumors.                                                                                                                                                                                     | MSigDBv3.0 CGP | 223 | 7  | 2   | 3.6  | 0.00454 | 1 | 0.067  | FOXC1, FSCN1, GPRC5B, PLTP, S100A10, TM4SF1, TNFRSF21                                      |
| AAAGACA,MIR-511                                                        | microRNA     |                     |            | Targets of MicroRNA AAAGACA,MIR-511                                                                                                                                                                                                                                                                                                         | MSigDBv3.0 MIR | 168 | 6  | 1.5 | 4.1  | 0.00456 | 1 | 0.0671 | CRIM1, FN1, GJA1, GPR116, RHOJ, SEMA3F                                                     |
| module 27                                                              | others       |                     |            | Genes in module_27                                                                                                                                                                                                                                                                                                                          | MSigDBv3.0 CM  | 345 | 9  | 3.2 | 3    | 0.00461 | 1 | 0.0677 | GPRC5B, HYAL2, IL1R1, ITGA9, LEPR, LPHN2, TEK, TIE1, TNFRSF21                              |
| chr7q32                                                                | others       |                     |            | Genes in cytogenetic band chr7q32                                                                                                                                                                                                                                                                                                           | MSigDBv3.0     | 37  | 3  | 0.3 | 9.7  | 0.00467 | 1 | 0.0682 | FLNC, MEST, PODXL                                                                          |
| CONRAD STEM CELL                                                       | others       |                     |            | Supplementary Table 2. Genelist comparing microarray expression profiles of spermatogonial cells, haGSCs and hES (H1) cells. Examples of expression rates of different hES cell enriched and germ cell specific genes, surface markers for germ cell selection and signal transduction in all three cell types (spermatogonial cells = SC). | MSigDBv3.0 CGP | 37  | 3  | 0.3 | 9.7  | 0.00467 | 1 | 0.0682 | CD9, DKK3, GJA1                                                                            |
| V\$FOX Q2                                                              | TF           | FOXF2               |            | Genes with promoter regions [-2kb,2kb] around transcription start site containing the motif KATTGTTTRTTTW which matches annotation for FOXF2: forkhead box F2                                                                                                                                                                               | MSigDBv3.0 TFT | 169 | 6  | 1.5 | 4.1  | 0.00469 | 1 | 0.0684 | CRIM1, EFEMP1, FSTL1, GATA6, NRG1, NTN1                                                    |
| POSITIVE REGULATION OF SIGNAL TRANSDUCTION                             | signaling    | signal transduction |            | Genes annotated by the GO term GO:0009967. Any process that activates or increases the frequency, rate or extent of signal transduction.                                                                                                                                                                                                    | MSigDBv3.0 BP  | 119 | 5  | 1.1 | 4.9  | 0.0048  | 1 | 0.0698 | CDH13, ECM1, GJA1, PLK2, RHOC                                                              |
| GTGCCTT,MIR-506                                                        | microRNA     |                     |            | Targets of MicroRNA GTGCCTT,MIR-506                                                                                                                                                                                                                                                                                                         | MSigDBv3.0 MIR | 623 | 13 | 5.7 | 2.4  | 0.00493 | 1 | 0.0715 | ATP1A1, CAV1, CD151, COL5A1, EPS8, GATA6, LRIG1, MARVELD1, MDK, MYH10, SFRP5, SLC29A1, VIM |
| CELL SURFACE                                                           | ECM          | adhesion            | membrane   | Genes annotated by the GO term GO:0009986. The external part of the cell wall and/or plasma membrane.                                                                                                                                                                                                                                       | MSigDBv3.0 CC  | 75  | 4  | 0.7 | 6.2  | 0.00499 | 1 | 0.072  | BCAM, EPHB4, HSPB1, SULF1                                                                  |
| FERRANDO T ALL WITH MLL ENL FUSION UP                                  | tumor        | other               |            | Top 100 genes positively (UP) and negatively (DN) associated with T-cell acute lymphoblastic leukemia MLL T-ALL expressing MLL-ENL fusion [Gene ID=4297, 4298].                                                                                                                                                                             | MSigDBv3.0 CGP | 75  | 4  | 0.7 | 6.2  | 0.00499 | 1 | 0.072  | CD34, DSTN, PLEC, VIM                                                                      |
| LIAO HAVE SOX4 BINDING SITES                                           | tumor        | other               | metastasis | Genes up-regulated in the samples with intrahepatic metastatic hepatocellular carcinoma (HCC) vs primary HCC that also have putative binding sites for SOX4 [Gene ID=6659].                                                                                                                                                                 | MSigDBv3.0 CGP | 38  | 3  | 0.3 | 9.4  | 0.00503 | 1 | 0.0726 | GPRC5B, LAMB1, SERPINE2                                                                    |
| module 37                                                              | others       |                     |            | Genes in module_37                                                                                                                                                                                                                                                                                                                          | MSigDBv3.0 CM  | 416 | 10 | 3.8 | 2.8  | 0.0051  | 1 | 0.0734 | CD9, CDH13, CDH5, EDN1, GJA1, HYAL2, IFI27, IL1RL1, KIAA1522, SCARA3                       |

|                                          |           |              |             |                                                                                                                                                                                                             |                        |     |   |     |      |         |   |        |                                                                  |
|------------------------------------------|-----------|--------------|-------------|-------------------------------------------------------------------------------------------------------------------------------------------------------------------------------------------------------------|------------------------|-----|---|-----|------|---------|---|--------|------------------------------------------------------------------|
| POOLA INVASIVE BREAST CANCER UP          | tumor     | breast       | ADHC vs ADH | Genes up-regulated in atypical ductal hyperplastic tissues from patients with (ADHC) breast cancer vs those without the cancer (ADH).                                                                       | MSigDBv3.0 CGP         | 288 | 8 | 2.6 | 3.2  | 0.00515 | 1 | 0.0738 | CDH11, COL5A1, COL5A2, ECM1, FN1, SERPINE1, SULF1, VCAN          |
| FRIDMAN SENESENCE DN                     | signaling | senescent    |             | Genes down-regulated in senescent cells.                                                                                                                                                                    | MSigDBv3.0 CGP         | 12  | 2 | 0.1 | 21.9 | 0.00518 | 1 | 0.0738 | COL3A1, ID1                                                      |
| LOPEZ MESOTHELIOMA SURVIVAL DN           | tumor     | other        | prognosis   | Top genes associated with unfavorable survival after surgery of patients with epithelioid mesothelioma.                                                                                                     | MSigDBv3.0 CGP         | 12  | 2 | 0.1 | 21.9 | 0.00518 | 1 | 0.0738 | COL5A1, VCAN                                                     |
| LOW DENSITY LIPOPROTEIN BINDING          | others    |              |             | Genes annotated by the GO term GO:0030169. Interacting selectively with low-density lipoprotein, one of the classes of lipoproteins found in blood plasma in many animals (data normally relate to humans). | MSigDBv3.0 MF          | 12  | 2 | 0.1 | 21.9 | 0.00518 | 1 | 0.0738 | CDH13, STAB1                                                     |
| module 190                               | signaling | IGFBP        |             | Genes in module_190: IGFBPs                                                                                                                                                                                 | MSigDBv3.0 CM          | 12  | 2 | 0.1 | 21.9 | 0.00518 | 1 | 0.0738 | CTGF, IGFBP7                                                     |
| SENESE HDAC1 AND HDAC2 TARGETS UP        | tumor     | other        |             | Genes up-regulated in U2OS cells (osteosarcoma) upon knockdown of both HDAC1 and HDAC2 [Gene ID=3065, 3066] by RNAi.                                                                                        | MSigDBv3.0 CGP         | 229 | 7 | 2.1 | 3.5  | 0.00524 | 1 | 0.0744 | DKK2, FN1, ITGA6, MAOA, PLEC, ROBO4, TIE1                        |
| AMIT EGF RESPONSE 60 MCF10A              | signaling | EGF          | MCF10A      | Genes whose expression peaked at 60 min after stimulation of MCF10A cells with EGF [Gene ID=1950].                                                                                                          | MSigDBv3.0 CGP         | 39  | 3 | 0.4 | 9.2  | 0.00542 | 1 | 0.0763 | CTGF, ID1, PLK2                                                  |
| KERLEY RESPONSE TO CISPLATIN UP          | tumor     | resistance   | cisplatin   | Genes up-regulated in NT2/D1 cells (embryonal carcinoma) in response to treatment with cisplatin [PubChem=2767].                                                                                            | MSigDBv3.0 CGP         | 39  | 3 | 0.4 | 9.2  | 0.00542 | 1 | 0.0763 | CAV1, PLK2, SERPINE1                                             |
| KRASNOSELSKAYA ILF3 TARGETS DN           | tumor     | other        |             | Down-regulated in GHOST(3)CXCRA cells (osteosarcoma) upon ectopic expression of ILF3 [Gene ID=3609].                                                                                                        | MSigDBv3.0 CGP         | 39  | 3 | 0.4 | 9.2  | 0.00542 | 1 | 0.0763 | CDH11, CXCR7, TEK                                                |
| TOMLINS PROSTATE CANCER DN               | tumor     | other        |             | Genes down-regulated in prostate cancer vs benign prostate tissue, based on a meta-analysis of five gene expression profiling studies.                                                                      | MSigDBv3.0 CGP         | 39  | 3 | 0.4 | 9.2  | 0.00542 | 1 | 0.0763 | ITGB4, LAMA4, PTRF                                               |
| LEE NEURAL CREST STEM CELL DN            | others    |              |             | Genes down-regulated in the neural crest stem cells (NCS), defined as p75+/HNK1+ [Gene ID=4804, 27087].                                                                                                     | MSigDBv3.0 CGP         | 123 | 5 | 1.1 | 4.7  | 0.00551 | 1 | 0.0775 | CD9, CXCR7, EFEMP1, GAS6, PLK2                                   |
| YAGI AML WITH 11Q23 REARRANGED           | tumor     | other        |             | Genes specifically expressed in samples from patients with pediatric acute myeloid leukemia (AML) bearing 11q23 rearrangements.                                                                             | MSigDBv3.0 CGP         | 355 | 9 | 3.3 | 2.9  | 0.00554 | 1 | 0.0776 | ADAM15, COL6A2, CTGF, FOXC1, FSCN1, HSPG2, ITGAV, LRIG1, S100A10 |
| V\$FOXO1 02                              | TF        | FOXO1A       |             | Genes with promoter regions [-2kb,2kb] around transcription start site containing the motif GNNTTGTTTACNTT which matches annotation for FOXO1A: forkhead box O1A (rhabdomyosarcoma)                         | MSigDBv3.0 TFT         | 175 | 6 | 1.6 | 3.9  | 0.00555 | 1 | 0.0776 | FSTL1, MDK, NRG1, NTN1, PTMS, TEK                                |
| CREIGHTON ENDOCRINE THERAPY RESISTANCE 4 | tumor     | resistance   | ER          | The 'group 4 set' of genes associated with acquired endocrine therapy resistance in breast tumors expressing ESR1 but not ERBB2 [Gene ID=2099, 2064].                                                       | MSigDBv3.0 CGP         | 293 | 8 | 2.7 | 3.1  | 0.00569 | 1 | 0.0795 | BMPER, COL5A1, FLNB, LRIG1, MRC2, SEMA3F, SULF1, VCAN            |
| ST INTEGRIN SIGNALING PATHWAY            | signaling | integrin     |             | Integrin Signaling Pathway                                                                                                                                                                                  | MSigDBv3.0 CP          | 78  | 4 | 0.7 | 6    | 0.00573 | 1 | 0.0798 | ANGPTL2, CAV1, ITGA6, ITGA9                                      |
| VALK AML CLUSTER 11                      | tumor     | other        |             | Top 40 genes from cluster 11 of acute myeloid leukemia (AML) expression profile; 67% of the samples are FAB M4 or M5.                                                                                       | MSigDBv3.0 CGP         | 40  | 3 | 0.4 | 8.9  | 0.00582 | 1 | 0.0808 | CD34, ITGA6, PALM                                                |
| HARRIS HYPOXIA                           | signaling | hypoxia      |             | Genes known to be induced by hypoxia                                                                                                                                                                        | MSigDBv3.0 CGP         | 79  | 4 | 0.7 | 5.9  | 0.00599 | 1 | 0.0829 | COL5A1, EDN1, TEK, VIM                                           |
| WANG HCP PROSTATE CANCER                 | tumor     | other        |             | Genes with the high-CpG-density promoters (HCP) that were up-regulated in 1542-CP3TX cells (prostate cancer) compared to 1542-NPTX (normal prostate).                                                       | MSigDBv3.0 CGP         | 79  | 4 | 0.7 | 5.9  | 0.00599 | 1 | 0.0829 | CRIP1, FLNC, FN1, SPTAN1                                         |
| GATAAGR V\$GATA C                        | TF        | unknown      |             | Genes with promoter regions [-2kb,2kb] around transcription start site containing motif GATAAGR. Motif does not match any known transcription factor                                                        | MSigDBv3.0 TFT         | 235 | 7 | 2.2 | 3.4  | 0.00602 | 1 | 0.0831 | BMP6, CD34, EDN1, MYH10, PKHD1L1, PVRL2, TNXB                    |
| NEGATIVE REGULATION OF ANGIOGENESIS      | others    | angiogenesis |             | Genes annotated by the GO term GO:0016525. Any process that stops, prevents or reduces the frequency, rate or extent of angiogenesis.                                                                       | MSigDBv3.0 BP          | 13  | 2 | 0.1 | 19.9 | 0.00609 | 1 | 0.0835 | COL4A2, STAB1                                                    |
| REACTOME METABOLISM OF NITRIC OXIDE      | others    |              |             | Genes involved in Metabolism of nitric oxide                                                                                                                                                                | MSigDBv3.0 CP:REACTOME | 13  | 2 | 0.1 | 19.9 | 0.00609 | 1 | 0.0835 | CAV1, NOS3                                                       |
| SABATES COLORECTAL ADENOMA SIZE DN       | tumor     | other        |             | A selection of genes whose expression displayed significant negative correlation with size of colorectal adenoma.                                                                                           | MSigDBv3.0 CGP         | 13  | 2 | 0.1 | 19.9 | 0.00609 | 1 | 0.0835 | MAOA, MMP28                                                      |
| HAMAI APOPTOSIS VIA TRAIL DN             | tumor     | resistance   | TRAIL       | Genes down-regulated in T1 cells (primary melanoma, sensitive to TRAIL [Gene ID=8743]) compared to G1 cells (metastatic melanoma, resistant to TRAIL).                                                      | MSigDBv3.0 CGP         | 126 | 5 | 1.2 | 4.6  | 0.0061  | 1 | 0.0835 | COL6A1, MAOA, MDK, PLTP, SLC29A1                                 |
| DAVICIONI MOLECULAR ARMS VS ERMS DN      | tumor     | other        |             | Genes down-regulated in mARMS (molecular ARMS) compared to the mERMS (molecular ERMS) class of rhabdomyosarcoma tumors.                                                                                     | MSigDBv3.0 CGP         | 179 | 6 | 1.6 | 3.9  | 0.00618 | 1 | 0.0843 | COL5A2, EPHB4, LTBP4, MMP2, PLK2, SCARA3                         |

|                                                                  |           |            |        |                                                                                                                                                                                                              |                        |     |    |     |      |         |   |        |                                                                                  |
|------------------------------------------------------------------|-----------|------------|--------|--------------------------------------------------------------------------------------------------------------------------------------------------------------------------------------------------------------|------------------------|-----|----|-----|------|---------|---|--------|----------------------------------------------------------------------------------|
| V\$PU1 Q6                                                        | TF        | others     |        | Genes with promoter regions [-2kb,2kb] around transcription start site containing the motif WGAGGAAG which matches annotation for SPI1: spleen focus forming virus (SFFV) proviral integration oncogene spi1 | MSigDBv3.0 TFT         | 179 | 6  | 1.6 | 3.9  | 0.00618 | 1 | 0.0843 | ADAM15, ADAMTS1, ELN, FAM38A, PSMD9, PTMS                                        |
| LIU TARGETS OF VMYB VS CMYB DN                                   | others    |            |        | Gene in the opposite directions by v-MYB (DN) and c-MYB (UP) variants of CMYB [Gene ID=4602] overexpressed in primary monocyte cultures off adenoviral vectors.                                              | MSigDBv3.0 CGP         | 41  | 3  | 0.4 | 8.7  | 0.00624 | 1 | 0.0848 | COL4A2, TM4SF1, VCAN                                                             |
| POSITIVE REGULATION OF I KAPPAB KINASE NF KAPPAB CASCADE         | signaling | NF-KB      |        | Genes annotated by the GO term GO:0043123. Any process that activates or increases the frequency, rate or extent of an I-kappaB kinase/NF-kappaB induced cascade.                                            | MSigDBv3.0 BP          | 80  | 4  | 0.7 | 5.8  | 0.00626 | 1 | 0.0848 | ECM1, GJA1, PLK2, RHOC                                                           |
| ROSS AML WITH PML RARA FUSION                                    | tumor     | other      |        | Top 100 probe sets for pediatric acute myeloid leukemia (AML) subtype t(15;17): has PML RARA fusion [Gene ID=5371, 5914].                                                                                    | MSigDBv3.0 CGP         | 80  | 4  | 0.7 | 5.8  | 0.00626 | 1 | 0.0848 | AGRN, MMP2, MRC2, STAB1                                                          |
| ACTIN CYTOSKELETON                                               | others    |            |        | Genes annotated by the GO term GO:0015629. The part of the cytoskeleton (the internal framework of a cell) composed of actin and associated proteins. Includes actin cytoskeleton-associated complexes.      | MSigDBv3.0 CC          | 127 | 5  | 1.2 | 4.5  | 0.0063  | 1 | 0.0852 | FLNB, FSCN1, MYH10, SPTAN1, SYNPO                                                |
| RECEPTOR ACTIVITY                                                | others    |            |        | Genes annotated by the GO term GO:0004872. Combining with an extracellular or intracellular messenger to initiate a change in cell activity.                                                                 | MSigDBv3.0 MF          | 570 | 12 | 5.2 | 2.4  | 0.00637 | 1 | 0.0859 | BCAM, CRIM1, GPR116, IL1R1, LPHN2, PTPRB, PVRL2, ROBO4, SCARA3, STAB1, TEK, TIE1 |
| module 20                                                        | others    |            |        | Genes in module_20                                                                                                                                                                                           | MSigDBv3.0 CM          | 81  | 4  | 0.7 | 5.7  | 0.00654 | 1 | 0.0881 | ADAM15, CD34, HYAL2, PALM                                                        |
| CHEN LVAD SUPPORT OF FAILING HEART DN                            | others    |            |        | Down-regulated genes in the left ventricle myocardium of patients with heart failure following implantation of LVAD (left ventricular assist device).                                                        | MSigDBv3.0 CGP         | 42  | 3  | 0.4 | 8.5  | 0.00667 | 1 | 0.0896 | GJA1, PTGIS, TM4SF1                                                              |
| CHIARADONNA NEOPLASTIC TRANSFORMATION KRAS UP                    | tumor     | other      |        | Genes up-regulated in transformed NIH3T3 cells (fibroblasts transformed by activated KRAS [Gene ID=3845]) vs normal cells.                                                                                   | MSigDBv3.0 CGP         | 129 | 5  | 1.2 | 4.5  | 0.00673 | 1 | 0.0896 | ANGPTL2, APCDD1, GJA1, IL1RL1, ITGA6                                             |
| KAN RESPONSE TO ARSENIC TRIOXIDE                                 | tumor     | other      |        | Genes changed in U373-MG cells (malignant glioma) upon treatment with arsenic trioxide [PubChem=14888], a chemical that can cause autophagic cell death.                                                     | MSigDBv3.0 CGP         | 129 | 5  | 1.2 | 4.5  | 0.00673 | 1 | 0.0896 | DPYSL3, PLK2, PODXL, SERPINE1, VCAN                                              |
| KIM WT1 TARGETS 8HR DN                                           | tumor     | other      |        | Genes down-regulated in UB27 cells (osteosarcoma) at 8 hr after inducing the expression of a mutant form of WT1 [Gene ID=7490].                                                                              | MSigDBv3.0 CGP         | 129 | 5  | 1.2 | 4.5  | 0.00673 | 1 | 0.0896 | CTGF, CXCR7, ID1, NRG1, PLK2                                                     |
| REACTOME APOPTOSIS                                               | signaling | apoptosis  |        | Genes involved in Apoptosis                                                                                                                                                                                  | MSigDBv3.0 CP:REACTOME | 129 | 5  | 1.2 | 4.5  | 0.00673 | 1 | 0.0896 | PLEC, PSMD9, SPTAN1, TJP1, VIM                                                   |
| CREIGHTON ENDOCRINE THERAPY RESISTANCE 1                         | tumor     | resistance | ER     | The 'group 1 set' of genes associated with acquired endocrine therapy resistance in breast tumors expressing ESR1 and ERBB2 [Gene ID=2099, 2064].                                                            | MSigDBv3.0 CGP         | 503 | 11 | 4.6 | 2.5  | 0.00676 | 1 | 0.0899 | BMPER, CAV1, COL5A1, FLNB, HMCN1, HSPB1, MARVELD1, MEST, MYOF, SLC29A1, SULF1    |
| ACAWYAAAG UNKNOWN                                                | others    |            |        | Genes with promoter regions [-2kb,2kb] around transcription start site containing motif ACAWYAAAG. Motif does not match any known transcription factor                                                       | MSigDBv3.0 TFT         | 82  | 4  | 0.8 | 5.7  | 0.00683 | 1 | 0.0904 | ALDH1A2, FN1, MMRN2, MYH10                                                       |
| TRANSMEMBRANE RECEPTOR PROTEIN TYROSINE KINASE SIGNALING PATHWAY | signaling | RTK        |        | Genes annotated by the GO term GO:0007169. The series of molecular signals generated as a consequence of a transmembrane receptor tyrosine kinase binding to its physiological ligand.                       | MSigDBv3.0 BP          | 82  | 4  | 0.8 | 5.7  | 0.00683 | 1 | 0.0904 | AGRN, CDH13, EPS8, TEK                                                           |
| AMIT EGF RESPONSE 20 MCF10A                                      | signaling | EGF        | MCF10A | Genes whose expression peaked at 20 min after stimulation of MCF10A cells with EGF [Gene ID=1950].                                                                                                           | MSigDBv3.0 CGP         | 14  | 2  | 0.1 | 18.2 | 0.00706 | 1 | 0.0926 | SCARB2, SEMA3F                                                                   |
| BIOCARTA PLATELETAPP PATHWAY                                     | others    |            |        | Platelet Amyloid Precursor Protein Pathway                                                                                                                                                                   | MSigDBv3.0 CP:BIOCARTA | 14  | 2  | 0.1 | 18.2 | 0.00706 | 1 | 0.0926 | COL4A2, SERPINE1                                                                 |
| module 470                                                       | others    |            |        | Genes in module_470                                                                                                                                                                                          | MSigDBv3.0 CM          | 14  | 2  | 0.1 | 18.2 | 0.00706 | 1 | 0.0926 | LPHN2, MAOA                                                                      |
| VERRECCHIA RESPONSE TO TGFB1 C3                                  | signaling | TGFB       | ECM    | Cluster 3: ECM related genes up-regulated in dermal fibroblasts within 30 min after TGFB1 [Gene ID=7040] addition; returned rapidly to basal level after that.                                               | MSigDBv3.0 CGP         | 14  | 2  | 0.1 | 18.2 | 0.00706 | 1 | 0.0926 | CD59, LAMA4                                                                      |
| WANG RESPONSE TO PACLITAXEL VIA MAPK8 UP                         | signaling | JNK        |        | Genes specifically up-regulated via JNK (MAPK8) [Gene ID=5599] signaling pathway activated by paclitaxel [PubChem=4666] in BR cells (ovarian cancer).                                                        | MSigDBv3.0 CGP         | 14  | 2  | 0.1 | 18.2 | 0.00706 | 1 | 0.0926 | EMP1, PLK2                                                                       |



|                                                         |           |          |             |                                                                                                                                                                                                                               |                        |      |    |      |      |         |   |                                                                                                                                       |
|---------------------------------------------------------|-----------|----------|-------------|-------------------------------------------------------------------------------------------------------------------------------------------------------------------------------------------------------------------------------|------------------------|------|----|------|------|---------|---|---------------------------------------------------------------------------------------------------------------------------------------|
| KEGG HYPERTROPHIC CARDIOMYOPATHY HCM                    | others    |          |             | Hypertrophic cardiomyopathy (HCM)                                                                                                                                                                                             | MSigDBv3.0 CP:KEGG     | 83   | 4  | 0.8  | 5.6  | 0.00712 | 1 | 0.093 ITGA6, ITGA9, ITGAV, ITGB4                                                                                                      |
| TRANSMEMBRANE RECEPTOR PROTEIN TYROSINE KINASE ACTIVITY | others    |          |             | Genes annotated by the GO term GO:0004714. Catalysis of the reaction: ATP + a protein-L-tyrosine = ADP + a protein-L-tyrosine phosphate, to initiate a change in cell activity.                                               | MSigDBv3.0 MF          | 43   | 3  | 0.4  | 8.2  | 0.00712 | 1 | 0.093 CRIM1, TEK, TIE1                                                                                                                |
| ELVIDGE HYPOXIA BY DMOG UP                              | tumor     | other    | hypoxia     | Genes up-regulated in MCF7 cells (breast cancer) treated with hypoxia mimetic DMOG [PubChem=3080614].                                                                                                                         | MSigDBv3.0 CGP         | 132  | 5  | 1.2  | 4.4  | 0.0074  | 1 | 0.0964 CAV1, CD59, GJA1, LOXL2, SERPINE1                                                                                              |
| TAKEDA TARGETS OF NUP98 HOXA9 FUSION 10D UP             | others    |          |             | Genes up-regulated in CD34+ [Gene ID=947] hematopoietic cells by expression of NUP98-HOXA9 fusion [Gene ID=4928, 3205] off a retroviral vector at 10 days after transduction.                                                 | MSigDBv3.0 CGP         | 186  | 6  | 1.7  | 3.7  | 0.00741 | 1 | 0.0964 CAV1, FLNB, FN1, IFI27, SERPINE2, TM4SF1                                                                                       |
| SCHUETZ BREAST CANCER DUCTAL INVASIVE DN                | tumor     | breast   | IDC vs DCIS | Genes down-regulated in invasive ductal carcinoma (IDC) relative to ductal carcinoma in situ (DCIS, non-invasive).                                                                                                            | MSigDBv3.0 CGP         | 84   | 4  | 0.8  | 5.5  | 0.00743 | 1 | 0.0964 MDK, PERP, PLK2, TM4SF1                                                                                                        |
| JIANG TIP30 TARGETS UP                                  | tumor     | other    |             | Up-regulated genes in HepG2 cells (liver cancer) overexpressing an oncogenic variant of tumor suppressor TIP30 [Gene ID=10553] compared to its wild type form.                                                                | MSigDBv3.0 CGP         | 44   | 3  | 0.4  | 8    | 0.00759 | 1 | 0.0984 ANXA2, ITGA6, LAMB1                                                                                                            |
| MEMBRANE ORGANIZATION AND BIOGENESIS                    | others    |          |             | Genes annotated by the GO term GO:0016044. A process that is carried out at the cellular level which results in the formation, arrangement of constituent parts, or disassembly of membranes inside and surrounding the cell. | MSigDBv3.0 BP          | 133  | 5  | 1.2  | 4.3  | 0.00763 | 1 | 0.0986 A4GALT, AGRN, CD9, CDH13, STAB1                                                                                                |
| CELL CELL ADHESION                                      | ECM       | adhesion |             | Genes annotated by the GO term GO:0016337. The attachment of one cell to another cell via adhesion molecules.                                                                                                                 | MSigDBv3.0 BP          | 85   | 4  | 0.8  | 5.4  | 0.00774 | 1 | 0.0997 CD34, CDH13, CDH5, PVRL2                                                                                                       |
| SMID BREAST CANCER LUMINAL A UP                         | tumor     | breast   | luminal A   | Genes up-regulated in the luminal A subtype of breast cancer.                                                                                                                                                                 | MSigDBv3.0 CGP         | 85   | 4  | 0.8  | 5.4  | 0.00774 | 1 | 0.0997 LEPR, MAOA, SPTAN1, TNXB                                                                                                       |
| MOREAUX MULTIPLE MYELOMA BY TACI UP                     | tumor     | other    |             | Genes distinguishing in multiple myeloma (MM) samples with higher expression of TACI [Gene ID=23495].                                                                                                                         | MSigDBv3.0 CGP         | 375  | 9  | 3.4  | 2.8  | 0.00782 | 1 | 0.101 EPHB4, LTBP4, MMRN2, MRC2, NRG1, PVRL2, RNASE1, ROBO4, SEMA3F                                                                   |
| NAKAYAMA SOFT TISSUE TUMORS PCA2 DN                     | others    |          |             | Top 100 probe sets contributing to the negative side of the 2nd principal component; associated with adipocytic differentiation.                                                                                              | MSigDBv3.0 CGP         | 86   | 4  | 0.8  | 5.4  | 0.00806 | 1 | 0.103 CLEC3B, MAOA, MEST, PLA2G2A                                                                                                     |
| REACTOME PLATELET DEGRANULATION                         | others    |          |             | Genes involved in Platelet degranulation                                                                                                                                                                                      | MSigDBv3.0 CP:REACTOME | 86   | 4  | 0.8  | 5.4  | 0.00806 | 1 | 0.103 CD9, FN1, GAS6, SERPINE1                                                                                                        |
| REGULATION OF I KAPPAB KINASE NF KAPPAB CASCADE         | signaling | NF-KB    |             | Genes annotated by the GO term GO:0043122. Any process that modulates an I-kappaB kinase/NF-kappaB induced cascade.                                                                                                           | MSigDBv3.0 BP          | 86   | 4  | 0.8  | 5.4  | 0.00806 | 1 | 0.103 ECM1, GJA1, PLK2, RHOC                                                                                                          |
| BIOCARTA HIF PATHWAY                                    | signaling | hypoxia  |             | Hypoxia-Inducible Factor in the Cardiovascular System                                                                                                                                                                         | MSigDBv3.0 CP:BIOCARTA | 15   | 2  | 0.1  | 16.8 | 0.0081  | 1 | 0.103 EDN1, NOS3                                                                                                                      |
| LOPEZ MESOTHELIOMA SURVIVAL OVERALL DN                  | tumor     | other    | prognosis   | Top genes associated with unfavorable overall survival of mesothelioma patients after surgery.                                                                                                                                | MSigDBv3.0 CGP         | 15   | 2  | 0.1  | 16.8 | 0.0081  | 1 | 0.103 COL5A1, FLNB                                                                                                                    |
| module 431                                              | others    |          |             | Genes in module_431: Eicosanoid metabolism                                                                                                                                                                                    | MSigDBv3.0 CM          | 15   | 2  | 0.1  | 16.8 | 0.0081  | 1 | 0.103 PLA2G2A, PTGIS                                                                                                                  |
| REACTOME PHASE 1 FUNCTIONALIZATION                      | others    |          |             | Genes involved in Phase 1 functionalization                                                                                                                                                                                   | MSigDBv3.0 CP:REACTOME | 15   | 2  | 0.1  | 16.8 | 0.0081  | 1 | 0.103 MAOA, PTGIS                                                                                                                     |
| RYTTCCTG V\$ETS2 B                                      | TF        | ETS2     |             | Genes with promoter regions [-2kb,2kb] around transcription start site containing the motif RYTTCTG which matches annotation for ETS2: v-ets erythroblastosis virus E26 oncogene homolog 2 (avian)                            | MSigDBv3.0 TFT         | 816  | 15 | 7.5  | 2.1  | 0.00816 | 1 | 0.103 ADAM15, CDH5, DKK2, ECM1, FLNB, FSTL1, GATA4, HYAL2, LTBP3, MYH10, RBMS2, RHOF, ROBO4, SEMA3F, SPTAN1                           |
| CAGCTG V\$AP4 Q5                                        | TF        | others   |             | Genes with promoter regions [-2kb,2kb] around transcription start site containing the motif CAGCTG which matches annotation for REPIN1: replication initiator 1                                                               | MSigDBv3.0 TFT         | 1138 | 19 | 10.4 | 1.9  | 0.00829 | 1 | 0.105 ANGPTL2, BMP6, CD9, CDH13, CRIP2, DOCK6, ELN, FLNC, HYAL2, ID1, ITGA6, LAMB2, MAGED1, MDK, MMRN2, PLS3, ROBO4, SERPINE1, SPTAN1 |

|                                                  |           |            |                |                                                                                                                                                                                                                                                                                                   |                |     |   |     |      |         |   |       |                                         |
|--------------------------------------------------|-----------|------------|----------------|---------------------------------------------------------------------------------------------------------------------------------------------------------------------------------------------------------------------------------------------------------------------------------------------------|----------------|-----|---|-----|------|---------|---|-------|-----------------------------------------|
| TISSUE DEVELOPMENT                               | others    |            |                | Genes annotated by the GO term GO:0009888. The process whose specific outcome is the progression of a tissue over time, from its formation to the mature structure.                                                                                                                               | MSigDBv3.0 BP  | 136 | 5 | 1.2 | 4.2  | 0.00836 | 1 | 0.105 | COL5A2, CTGF, EMP1, MEST, TIE1          |
| AMIT EGF RESPONSE 60 HELA                        | signaling | EGF        | Hela           | Genes whose expression peaked at 60 min after stimulation of HeLa cells with EGF [Gene ID=1950].                                                                                                                                                                                                  | MSigDBv3.0 CGP | 46  | 3 | 0.4 | 7.7  | 0.00859 | 1 | 0.107 | CTGF, FOXC1, SERPINE1                   |
| LUI THYROID CANCER PAX8 PPARG UP                 | tumor     | other      |                | Top genes distinguishing between follicular thyroid carcinoma (FTC) samples by the presence or absence of the PAX8-PPARG [Gene ID=7849, 5468] fusion protein.                                                                                                                                     | MSigDBv3.0 CGP | 46  | 3 | 0.4 | 7.7  | 0.00859 | 1 | 0.107 | FBN1, FSCN1, IL1R1                      |
| module 259                                       | signaling | RTK        |                | Genes in module_259: RTK signaling                                                                                                                                                                                                                                                                | MSigDBv3.0 CM  | 46  | 3 | 0.4 | 7.7  | 0.00859 | 1 | 0.107 | LEPR, TEK, TIE1                         |
| ALCALAY AML BY NPM1 LOCALIZATION DN              | tumor     | other      |                | Genes changed in acute myeloid leukemia (AML) with respect to cellular localization of NPM1 [Gene ID=4869]: cytoplasmic vs. nucleolar.                                                                                                                                                            | MSigDBv3.0 CGP | 192 | 6 | 1.8 | 3.6  | 0.0086  | 1 | 0.107 | CD34, EPS8, IGFBP7, ITGA9, PLXND1, TNXB |
| V\$ATF4 Q2                                       | TF        | others     |                | Genes with promoter regions [-2kb,2kb] around transcription start site containing the motif CVTGACGYMABG which matches annotation for ATF4: activating transcription factor 4 (tax-responsive enhancer element B67)                                                                               | MSigDBv3.0 TFT | 192 | 6 | 1.8 | 3.6  | 0.0086  | 1 | 0.107 | ECM1, FLNC, ID1, MAOA, PPP2R5B, TNXB    |
| V\$FOXO4 O2                                      | TF        | others     |                | Genes with promoter regions [-2kb,2kb] around transcription start site containing the motif NNGTTGTTTACNTN which matches annotation for MLLT7: TFT myeloid/lymphoid or mixed-lineage leukemia (trithorax homolog, Drosophila); translocated to, 7                                                 | MSigDBv3.0 TFT | 192 | 6 | 1.8 | 3.6  | 0.0086  | 1 | 0.107 | EMP1, FLNC, NRG1, NTN1, PALM, TEK       |
| HOEBEKE LYMPHOID STEM CELL DN                    | others    |            |                | Genes down-regulated in the common lymphoid progenitor (CLP, defined as CD34+CD38-CD7+ [Gene ID=947, 952, 924]) compared to a multipotent cord blood cell (defined as CD34+CD38+CD7-).                                                                                                            | MSigDBv3.0 CGP | 88  | 4 | 0.8 | 5.2  | 0.00873 | 1 | 0.108 | CFH, HSPB1, PLS3, SERPINE2              |
| ZHANG TARGETS OF EWSR1 FLI1 FUSION               | tumor     | other      |                | Genes up-regulated in RD-EF cells (rhabdomyosarcoma) engineered to express EWSR1-FLI1 fusion [Gene ID=2130, 2313] and which are also highly expressed in Ewing's family tumors.                                                                                                                   | MSigDBv3.0 CGP | 88  | 4 | 0.8 | 5.2  | 0.00873 | 1 | 0.108 | ATP1A1, CAV1, CDH11, CRIP2              |
| V\$GATA6 O1                                      | TF        | GATA6      |                | Genes with promoter regions [-2kb,2kb] around transcription start site containing the motif NNNGATWANN which matches annotation for GATA6: GATA binding protein 6                                                                                                                                 | MSigDBv3.0 TFT | 193 | 6 | 1.8 | 3.6  | 0.00881 | 1 | 0.109 | AQP1, BMP6, GATA6, LEPR, PVRL2, SFRP5   |
| V\$HNF4 DR1 Q3                                   | TF        | others     |                | Genes with promoter regions [-2kb,2kb] around transcription start site containing the motif TGAMCTTTGCCN which matches annotation for HNF4A: hepatocyte nuclear factor 4, alpha                                                                                                                   | MSigDBv3.0 TFT | 194 | 6 | 1.8 | 3.5  | 0.00902 | 1 | 0.11  | EFEMP1, GATA4, GPRC5B, ID1, MYH10, PTMS |
| V\$NRF2 Q4                                       | TF        | others     |                | Genes with promoter regions [-2kb,2kb] around transcription start site containing the motif NTGCTGAGTCAKN which matches annotation for NFE2L2: TTF nuclear factor (erythroid-derived 2)-like 2                                                                                                    | MSigDBv3.0 TFT | 194 | 6 | 1.8 | 3.5  | 0.00902 | 1 | 0.11  | ADAM15, FLNC, HSPG2, MMRN2, SYNPO, TNXB |
| V\$P53 O2                                        | TF        | TP53       |                | Genes with promoter regions [-2kb,2kb] around transcription start site containing the motif NGRCWGTCYCY which matches annotation for TP53: tumor protein p53 (Li-Fraumeni syndrome)                                                                                                               | MSigDBv3.0 TFT | 194 | 6 | 1.8 | 3.5  | 0.00902 | 1 | 0.11  | GATA4, MDK, MMP28, MRC2, NRG1, PPP2R5B  |
| module 486                                       | others    |            |                | Genes in module_486                                                                                                                                                                                                                                                                               | MSigDBv3.0 CM  | 89  | 4 | 0.8 | 5.2  | 0.00908 | 1 | 0.11  | ARHGAP23, ENG, PLXND1, SLC9A3R2         |
| HUANG FOXA2 TARGETS UP                           | tumor     | other      |                | Genes up-regulated in H358 cells (lung cancer) by inducible expression of FOXA2 [GeneID=3170] in a Tet-off system.                                                                                                                                                                                | MSigDBv3.0 CGP | 47  | 3 | 0.4 | 7.5  | 0.00911 | 1 | 0.11  | CXCR7, FN1, NRG1                        |
| ENZYME LINKED RECEPTOR PROTEIN SIGNALING PATHWAY | signaling |            |                | Genes annotated by the GO term GO:0007167. Any series of molecular signals initiated by the binding of an extracellular ligand to a receptor on the surface of the target cell, where the receptor possesses catalytic activity or is closely associated with an enzyme such as a protein kinase. | MSigDBv3.0 BP  | 139 | 5 | 1.3 | 4.1  | 0.00914 | 1 | 0.11  | AGRN, CDH13, ENG, EPS8, TEK             |
| ALONSO METASTASIS NEURAL UP                      | tumor     | other      | metastasis     | Neural-related genes up-regulated in melanoma tumors that developed metastases compared to primary melanoma that did not.                                                                                                                                                                         | MSigDBv3.0 CGP | 16  | 2 | 0.1 | 15.6 | 0.0092  | 1 | 0.11  | EMP1, S100A10                           |
| HOMOPHILIC CELL ADHESION                         | ECM       | adhesion   |                | Genes annotated by the GO term GO:0007156. The attachment of an adhesion molecule in one cell to an identical molecule in an adjacent cell.                                                                                                                                                       | MSigDBv3.0 BP  | 16  | 2 | 0.1 | 15.6 | 0.0092  | 1 | 0.11  | CDH5, PVRL2                             |
| KANG FLUOROURACIL RESISTANCE DN                  | tumor     | resistance | 5-fluorouracil | Genes down-regulated in gastric cancer cell lines resistant to 5-fluorouracil [PubChem=3385].                                                                                                                                                                                                     | MSigDBv3.0 CGP | 16  | 2 | 0.1 | 15.6 | 0.0092  | 1 | 0.11  | FLNB, ITGB4                             |
| KORKOLA TERATOMA UP                              | tumor     | other      |                | Genes from the 12p region that up-regulated in teratoma cells compared to normal testis.                                                                                                                                                                                                          | MSigDBv3.0 CGP | 16  | 2 | 0.1 | 15.6 | 0.0092  | 1 | 0.11  | EMP1, PTMS                              |
| MACLACHLAN BRCA1 TARGETS DN                      | tumor     | other      |                | Genes down-regulated in SW480 cells (colon cancer with mutated p53 [Gene ID=7157]) upon expression of BRCA1 [Gene ID=672] off an adenovirus vector.                                                                                                                                               | MSigDBv3.0 CGP | 16  | 2 | 0.1 | 15.6 | 0.0092  | 1 | 0.11  | CD59, CD9                               |
| module 275                                       | others    |            |                | Genes in module_275                                                                                                                                                                                                                                                                               | MSigDBv3.0 CM  | 16  | 2 | 0.1 | 15.6 | 0.0092  | 1 | 0.11  | ITGA9, ITGAV                            |

|                                                |           |                 |              |                                                                                                                                                                                        |                        |     |    |     |      |         |   |       |                                                                                                                     |
|------------------------------------------------|-----------|-----------------|--------------|----------------------------------------------------------------------------------------------------------------------------------------------------------------------------------------|------------------------|-----|----|-----|------|---------|---|-------|---------------------------------------------------------------------------------------------------------------------|
| module 474                                     | others    |                 |              | Genes in module_474                                                                                                                                                                    | MSigDBv3.0 CM          | 16  | 2  | 0.1 | 15.6 | 0.0092  | 1 | 0.11  | CTGF, IGFBP7                                                                                                        |
| MURATA VIRULENCE OF H PILORI                   | others    |                 |              | Selected genes up-regulated in WT-A10 cells (gastric epithelium) expressing the H. pilori virulence gene CagA.                                                                         | MSigDBv3.0 CGP         | 16  | 2  | 0.1 | 15.6 | 0.0092  | 1 | 0.11  | COL6A2, GAS6                                                                                                        |
| NIKOLSKY BREAST CANCER 21Q22 AMPLICON          | tumor     | breast          | amplicon     | Genes within amplicon 21q22 identified in a copy alterations study of 191 breast tumor samples.                                                                                        | MSigDBv3.0 CGP         | 16  | 2  | 0.1 | 15.6 | 0.0092  | 1 | 0.11  | COL6A1, COL6A2                                                                                                      |
| REACTOME CELLEXTRACELLULAR MATRIX INTERACTIONS | ECM       | ECM interaction |              | Genes involved in Cell-extracellular matrix interactions                                                                                                                               | MSigDBv3.0 CP:REACTOME | 16  | 2  | 0.1 | 15.6 | 0.0092  | 1 | 0.11  | FLNC, LIM2                                                                                                          |
| REACTOME CRMP5 IN SEMA3A SIGNALING             | others    |                 |              | Genes involved in CRMP5 in Sema3A signaling                                                                                                                                            | MSigDBv3.0 CP:REACTOME | 16  | 2  | 0.1 | 15.6 | 0.0092  | 1 | 0.11  | DPYSL3, PLXNA4                                                                                                      |
| REACTOME OTHER SEMAPHORIN INTERACTIONS         | others    |                 |              | Genes involved in Other semaphorin interactions                                                                                                                                        | MSigDBv3.0 CP:REACTOME | 16  | 2  | 0.1 | 15.6 | 0.0092  | 1 | 0.11  | PLXNA4, PLXND1                                                                                                      |
| SCHAVOLT TARGETS OF TP53 AND TP63              | TF        | TF53            |              | Genes up-regulated by TP53 [Gene ID=7157] and down-regulated by an isoform of TP63 [Gene ID=8626] in primary HEK cells (epidermal keratinocytes).                                      | MSigDBv3.0 CGP         | 16  | 2  | 0.1 | 15.6 | 0.0092  | 1 | 0.11  | PODXL, VCAN                                                                                                         |
| GOZGIT ESR1 TARGETS UP                         | tumor     | other           | ER           | Genes up-regulated in TMX2-28 cells (breast cancer) which do not express ESR1 [Gene ID=2099] compared to the parental MCF7 cells which do.                                             | MSigDBv3.0 CGP         | 140 | 5  | 1.3 | 4.1  | 0.00941 | 1 | 0.112 | ECM1, LAMB1, MMRN2, PALM, SERPINE1                                                                                  |
| KEGG DILATED CARDIOMYOPATHY                    | others    |                 |              | Dilated cardiomyopathy                                                                                                                                                                 | MSigDBv3.0 CP:KEGG     | 90  | 4  | 0.8 | 5.1  | 0.00943 | 1 | 0.112 | ITGA6, ITGA9, ITGAV, ITGB4                                                                                          |
| ZHONG RESPONSE TO AZACITIDINE AND TSA UP       | tumor     | resistance      | azacitidine  | Genes up-regulated in 3 out of 4 NSCLC cell lines (non-small cell lung cancer) after treatment with azacitidine [PubChem=9444] and TSA [PubChem=5562].                                 | MSigDBv3.0 CGP         | 196 | 6  | 1.8 | 3.5  | 0.00946 | 1 | 0.112 | CD9, COL1A2, ECM1, FLNC, MMP2, PTRF                                                                                 |
| CTTTGA VSLEF1 Q2                               | TF        | LEF1            |              | Genes with promoter regions [-2kb,2kb] around transcription start site containing the motif CTTTGA which matches annotation for LEF1: lymphoid enhancer-binding factor 1               | MSigDBv3.0 TFT         | 910 | 16 | 8.3 | 2    | 0.00954 | 1 | 0.113 | BGN, CDC42BPB, CDH13, COL5A1, EMP1, IL1RL1, LAMB2, LPHN2, NFE2L1, NRG1, PKHD1L1, PLXND1, ROBO4, SPTAN1, SULF1, TNXB |
| module 112                                     | others    |                 |              | Genes in module_112                                                                                                                                                                    | MSigDBv3.0 CM          | 257 | 7  | 2.4 | 3.1  | 0.00961 | 1 | 0.114 | CAV1, COL3A1, COL4A2, COL5A2, DPYSL3, LRRC32, NRG1                                                                  |
| KONDO EZH2 TARGETS                             | tumor     | other           | EZH2         | Genes up-regulated in PC3 cells (prostate cancer) after EZH2 [Gene ID=2146] knockdown by RNAi.                                                                                         | MSigDBv3.0 CGP         | 141 | 5  | 1.3 | 4.1  | 0.00968 | 1 | 0.114 | ANO1, CTGF, EMP1, GJA1, ITGA6                                                                                       |
| ELVIDGE HIF1A TARGETS DN                       | signaling | hypoxia         | breast cells | Genes down-regulated in MCF7 cells (breast cancer) after knockdown of HIF1A [Gene ID=3091] by RNAi.                                                                                    | MSigDBv3.0 CGP         | 91  | 4  | 0.8 | 5.1  | 0.0098  | 1 | 0.115 | CAV1, GJA1, LOXL2, PTRF                                                                                             |
| SEIDEN ONCOGENESIS BY MET                      | tumor     | other           |              | Genes changed in xenograft tumors formed by DLD-1 or DKO-4 cells (colon cancer) overexpressing MET [Gene ID=4233].                                                                     | MSigDBv3.0 CGP         | 91  | 4  | 0.8 | 5.1  | 0.0098  | 1 | 0.115 | EPS8, ITGA6, LAMB1, PLS3                                                                                            |
| V\$HNF4 Q6                                     | TF        | others          |              | Genes with promoter regions [-2kb,2kb] around transcription start site containing the motif AARGTCCAN which matches annotation for HNF4A: hepatocyte nuclear factor 4, alpha           | MSigDBv3.0 TFT         | 198 | 6  | 1.8 | 3.5  | 0.00992 | 1 | 0.117 | CTGF, EMP1, GATA4, KIF1C, MAGED1, PTMS                                                                              |
| ONDER CDH1 TARGETS 1 UP                        | EMT       | gene            | CDH1         | Genes up-regulated in HMLE cells (mmortalized nontransformed mammary epithelial) by expression of a dominant-negative form of E-cadherin (CDH1) [Gene ID=999].                         | MSigDBv3.0 CGP         | 142 | 5  | 1.3 | 4    | 0.00996 | 1 | 0.117 | CRIP2, LEPR, MAGED1, MMP28, SEMA3F                                                                                  |
| ONKEN UVEAL MELANOMA DN                        | tumor     | other           |              | Genes down-regulated in uveal melanoma: class 2 vs class 1 tumors.                                                                                                                     | MSigDBv3.0 CGP         | 532 | 11 | 4.9 | 2.4  | 0.0101  | 1 | 0.118 | CAV1, DSTN, HYAL2, LAMA4, LAMB2, MEST, NFE2L1, POSTN, SCARB2, TJP1, TXNDC5                                          |
| BROWNE HCMV INFECTION 2HR DN                   | others    |                 |              | Genes down-regulated in primary fibroblast cell culture point after infection with HCMV (AD169 strain) at 2 h time point that were not down-regulated at the previous time point, 1 h. | MSigDBv3.0 CGP         | 49  | 3  | 0.4 | 7.2  | 0.0102  | 1 | 0.119 | ANXA2, ITGA6, SERPINE1                                                                                              |
| LENAOUR DENDRITIC CELL MATURATION UP           | others    |                 |              | Genes up-regulated during in vitro maturation of CD14+ [Gene ID=929] monocytes (day 0) into immature (day 7) and mature dendritic cells (day 14).                                      | MSigDBv3.0 CGP         | 92  | 4  | 0.8 | 5    | 0.0102  | 1 | 0.119 | ECM1, GAS6, MAOA, SPTAN1                                                                                            |
| NATSUME RESPONSE TO INTERFERON BETA DN         | tumor     | other           |              | Genes down-regulated in T98 cells (glioma) 48 h after treatment with interferon beta.                                                                                                  | MSigDBv3.0 CGP         | 49  | 3  | 0.4 | 7.2  | 0.0102  | 1 | 0.119 | ANXA2, GAS6, MMP2                                                                                                   |
| CAGTATT,MIR-200B,MIR-200C,MIR-429              | microRNA  |                 |              | Targets of MicroRNA CAGTATT,MIR-200B,MIR-200C,MIR-429                                                                                                                                  | MSigDBv3.0 MIR         | 392 | 9  | 3.6 | 2.6  | 0.0103  | 1 | 0.119 | CDH11, EPS8, FN1, GATA4, LEPR, PLK2, PLS3, SEMA3F, SULF1                                                            |

|                                                        |        |         |                      |                                                                                                                                                                                                                                |                    |     |   |     |      |        |   |       |                                                      |
|--------------------------------------------------------|--------|---------|----------------------|--------------------------------------------------------------------------------------------------------------------------------------------------------------------------------------------------------------------------------|--------------------|-----|---|-----|------|--------|---|-------|------------------------------------------------------|
| KEGG PATHWAYS IN CANCER                                | tumor  | other   |                      | Pathways in cancer                                                                                                                                                                                                             | MSigDBv3.0 CP:KEGG | 325 | 8 | 3   | 2.8  | 0.0103 | 1 | 0.12  | COL4A2, FN1, ITGA6, ITGAV, LAMA4, LAMB1, LAMB2, MMP2 |
| GOUYER TATI TARGETS DN                                 | tumor  | other   |                      | Genes down-regulated in constitutively invasive HT-29 5M21 cells (colon cancer) vs those expressing functionally inactive TATI [Gene ID=6690].                                                                                 | MSigDBv3.0 CGP     | 17  | 2 | 0.2 | 14.6 | 0.0104 | 1 | 0.12  | A4GALT, FN1                                          |
| NELSON RESPONSE TO ANDROGEN DN                         | tumor  | other   |                      | Genes down-regulated in LNCaP cells (prostate cancer) in response to synthetic androgen R1881 [PubChem=13766].                                                                                                                 | MSigDBv3.0 CGP     | 17  | 2 | 0.2 | 14.6 | 0.0104 | 1 | 0.12  | FN1, SLC29A1                                         |
| V\$PXR Q2                                              | TF     | others  |                      | Genes with promoter regions [-2kb,2kb] around transcription start site containing the motif RRGGYANTRNM which matches annotation for NR1H4: nuclear receptor subfamily 1, group H, member 4                                    | MSigDBv3.0 TFT     | 200 | 6 | 1.8 | 3.4  | 0.0104 | 1 | 0.12  | ADAM15, ALDH1A2, CTGF, FSTL1, GATA4, NRG1            |
| ION BINDING                                            | others |         |                      | Genes annotated by the GO term GO:0043167. Interacting selectively with ions, charged atoms or groups of atoms.                                                                                                                | MSigDBv3.0 MF      | 263 | 7 | 2.4 | 3    | 0.0108 | 1 | 0.125 | CDC42BPB, CRIP1, CRIP2, FBLN2, FBN1, LTBP4, MMP2     |
| chr3q21                                                | others |         |                      | Genes in cytogenetic band chr3q21                                                                                                                                                                                              | MSigDBv3.0         | 95  | 4 | 0.9 | 4.8  | 0.0113 | 1 | 0.131 | HEG1, PLXND1, SLC02A1, TM4SF1                        |
| CHARAFE BREAST CANCER BASAL VS MESENCHYMAL DN          | tumor  | breast  | basal vs mesenchymal | Genes down-regulated in basal-like breast cancer cell lines as compared to the mesenchymal-like ones.                                                                                                                          | MSigDBv3.0 CGP     | 51  | 3 | 0.5 | 6.9  | 0.0114 | 1 | 0.131 | COL6A2, FLNC, LOXL2                                  |
| TRANSMEMBRANE RECEPTOR PROTEIN KINASE ACTIVITY         | others |         |                      | Genes annotated by the GO term GO:0019199.                                                                                                                                                                                     | MSigDBv3.0 MF      | 51  | 3 | 0.5 | 6.9  | 0.0114 | 1 | 0.131 | CRIM1, TEK, TIE1                                     |
| KYNG DNA DAMAGE BY 4NQO                                | tumor  | other   |                      | Genes specifically responding to 4NQO treatment of primary fibroblasts.                                                                                                                                                        | MSigDBv3.0 CGP     | 18  | 2 | 0.2 | 13.7 | 0.0116 | 1 | 0.132 | FBLN2, ID1                                           |
| LIPOPROTEIN BINDING                                    | others |         |                      | Genes annotated by the GO term GO:0008034. Interacting selectively with any conjugated, water-soluble protein in which the nonprotein moiety consists of a lipid or lipids.                                                    | MSigDBv3.0 MF      | 18  | 2 | 0.2 | 13.7 | 0.0116 | 1 | 0.132 | CDH13, STAB1                                         |
| module 156                                             | others |         |                      | Genes in module_156                                                                                                                                                                                                            | MSigDBv3.0 CM      | 18  | 2 | 0.2 | 13.7 | 0.0116 | 1 | 0.132 | COL6A1, PTGIS                                        |
| RUGO RESPONSE TO 4NQO                                  | tumor  | other   |                      | Subset C (Fig 2c): genes changed upon exposure to the carcinogen 4-nitroquinoline-1-oxide (4NQO) [PubChem=5955].                                                                                                               | MSigDBv3.0 CGP     | 18  | 2 | 0.2 | 13.7 | 0.0116 | 1 | 0.132 | FBLN2, ID1                                           |
| WATANABE ULCERATIVE COLITIS WITH CANCER UP             | tumor  | other   |                      | Genes up-regulated in non-neoplastic rectal mucosa samples from patients having cancer associated with ulcerative colitis, compared to those who did not have the cancer.                                                      | MSigDBv3.0 CGP     | 18  | 2 | 0.2 | 13.7 | 0.0116 | 1 | 0.132 | ANGPTL2, FBN1                                        |
| HAMAI APOPTOSIS VIA TRAIL UP                           | tumor  | other   |                      | Genes up-regulated in T1 cells (primary melanoma, sensitive to TRAIL [Gene ID=8743]) compared to G1 cells (metastatic melanoma, resistant to TRAIL).                                                                           | MSigDBv3.0 CGP     | 333 | 8 | 3.1 | 2.7  | 0.0118 | 1 | 0.134 | EMP1, FSTL1, ITGA6, ITGAV, MYH10, NPDC1, PLS3, PODXL |
| SHAFFER IRF4 TARGETS IN MYELOMA VS MATURE B LYMPHOCYTE | tumor  | other   |                      | IRF4 [Gene ID=3662] target genes up-regulated in primary myeloma vs. mature B lymphocytes.                                                                                                                                     | MSigDBv3.0 CGP     | 96  | 4 | 0.9 | 4.8  | 0.0118 | 1 | 0.133 | BMP6, CAV1, HSPB1, TXNDC5                            |
| RNCTGNYNRNCTGNY UNKNOWN                                | TF     | unknown |                      | Genes with promoter regions [-2kb,2kb] around transcription start site containing motif RNCTGNYNRNCTGNY. Motif does not match any known transcription factor                                                                   | MSigDBv3.0 TFT     | 52  | 3 | 0.5 | 6.7  | 0.012  | 1 | 0.136 | BMP6, ID1, NOS3                                      |
| TAKEDA TARGETS OF NUP98 HOXA9 FUSION 8D UP             | others |         |                      | Genes up-regulated in CD34+ [Gene ID=947] hematopoietic cells by expression of NUP98-HOXA9 fusion [Gene ID=4928, 3205] off a retroviral vector at 8 days after transduction.                                                   | MSigDBv3.0 CGP     | 149 | 5 | 1.4 | 3.8  | 0.0121 | 1 | 0.136 | FOXC1, GJA1, IFI27, LTBP3, MYH10                     |
| ARGGGTTAA UNKNOWN                                      | TF     | others  |                      | Genes with promoter regions [-2kb,2kb] around transcription start site containing motif ARGGGTTAA. Motif does not match any known transcription factor                                                                         | MSigDBv3.0 TFT     | 97  | 4 | 0.9 | 4.7  | 0.0122 | 1 | 0.137 | CDH5, DSTN, FLNC, PVRL2                              |
| V\$NF1 Q6 01                                           | TF     | NF1     |                      | Genes with promoter regions [-2kb,2kb] around transcription start site containing the motif NTGGNNNNNGCCAANN which matches annotation for NF1: neurofibromin 1 (neurofibromatosis, von Recklinghausen disease, Watson disease) | MSigDBv3.0 TFT     | 207 | 6 | 1.9 | 3.3  | 0.0122 | 1 | 0.137 | BMP6, LAMB2, POSTN, RHOF, SLC02A1, TEK               |
| CATION BINDING                                         | others |         |                      | Genes annotated by the GO term GO:0043169. Interacting selectively with cations, charged atoms or groups of atoms with a net positive charge.                                                                                  | MSigDBv3.0 MF      | 208 | 6 | 1.9 | 3.3  | 0.0124 | 1 | 0.139 | CRIP1, CRIP2, FBLN2, FBN1, LTBP4, MMP2               |
| module 111                                             | others |         |                      | Genes in module_111                                                                                                                                                                                                            | MSigDBv3.0 CM      | 151 | 5 | 1.4 | 3.8  | 0.0127 | 1 | 0.143 | BGN, CD34, CDH5, SEMA3F, SLC9A3R2                    |
| TGASTMAGC V\$NFE2 01                                   | TF     | others  |                      | Genes with promoter regions [-2kb,2kb] around transcription start site containing the motif TGASTMAGC which matches annotation for NFE2: nuclear factor (erythroid-derived 2), 45kDa                                           | MSigDBv3.0 TFT     | 151 | 5 | 1.4 | 3.8  | 0.0127 | 1 | 0.143 | ADAM15, MMRN2, PLS3, SYNPO, TNXB                     |

|                                                           |              |            |             |                                                                                                                                                                                                    |                    |     |    |     |      |        |   |       |                                                                             |
|-----------------------------------------------------------|--------------|------------|-------------|----------------------------------------------------------------------------------------------------------------------------------------------------------------------------------------------------|--------------------|-----|----|-----|------|--------|---|-------|-----------------------------------------------------------------------------|
| CHIBA RESPONSE TO TSA DN                                  | tumor        | other      |             | Cancer related genes down-regulated in any of four hepatoma cell lines following 24 h treatment with TSA [PubChem=5562].                                                                           | MSigDBv3.0 CGP     | 19  | 2  | 0.2 | 12.9 | 0.0129 | 1 | 0.143 | ITGAV, LAMB1                                                                |
| ESTABLISHMENT AND OR MAINTENANCE OF CELL POLARITY         | others       |            |             | Genes annotated by the GO term GO:0007163. The specification, formation and maintenance of anisotropic intracellular organization or cell growth patterns.                                         | MSigDBv3.0 BP      | 19  | 2  | 0.2 | 12.9 | 0.0129 | 1 | 0.143 | CDC42BPB, SFRP5                                                             |
| INTEGRIN COMPLEX                                          | ECM          | adhesion   | receptor    | Genes annotated by the GO term GO:0008305. Any member of a family of heterodimeric transmembrane receptors for cell-adhesion molecules. The alpha and beta subunits are noncovalently bonded.      | MSigDBv3.0 CC      | 19  | 2  | 0.2 | 12.9 | 0.0129 | 1 | 0.143 | ITGA9, ITGB4                                                                |
| KANG DOXORUBICIN RESISTANCE DN                            | tumor        | resistance | doxorubicin | Genes differentially expressed in gastric cancer cell lines: doxorubicin [PubChem=31703] resistant vs sensitive.                                                                                   | MSigDBv3.0 CGP     | 19  | 2  | 0.2 | 12.9 | 0.0129 | 1 | 0.143 | CRIM1, TJP1                                                                 |
| MASRI RESISTANCE TO TAMOXIFEN AND AROMATASE INHIBITORS UP | tumor        | resistance | ER          | Genes up-regulated in derivatives of MCF-7aro cells (breast cancer) that developed resistance to tamoxifen [PubChem=5376] or inhibitors of aromatase (CYP19A1) [Gene ID=1588].                     | MSigDBv3.0 CGP     | 19  | 2  | 0.2 | 12.9 | 0.0129 | 1 | 0.143 | GJA1, SULF1                                                                 |
| V\$IK2 01                                                 | TF           | others     |             | Genes with promoter regions [-2kb,2kb] around transcription start site containing motif NNTGGGAWNNC. Motif does not match any known transcription factor                                           | MSigDBv3.0 TFT     | 210 | 6  | 1.9 | 3.3  | 0.013  | 1 | 0.143 | CDH5, CTGF, MAGED1, RBMS2, SEMA3F, TNFRSF21                                 |
| V\$NFKB C                                                 | TF           | others     |             | Genes with promoter regions [-2kb,2kb] around transcription start site containing motif NGGGACTTCCA. Motif does not match any known transcription factor                                           | MSigDBv3.0 TFT     | 210 | 6  | 1.9 | 3.3  | 0.013  | 1 | 0.143 | CDH5, CTGF, GATA4, ITGB4, PTMS, S100A10                                     |
| FLOTHO PEDIATRIC ALL THERAPY RESPONSE UP                  | tumor        | other      |             | Up-regulated genes significantly associated with positive minimal residual disease (MRD) on day 46 after chemotherapy treatment of children with acute lymphoblastic leukemia (ALL).               | MSigDBv3.0 CGP     | 54  | 3  | 0.5 | 6.5  | 0.0133 | 1 | 0.146 | CD34, EMP1, ITGA6                                                           |
| JL RESPONSE TO FSH UP                                     | tumor        | other      |             | Genes up-regulated in MCV152 cells (ovarian cancer) treated with follicle stimulating hormone (FSH).                                                                                               | MSigDBv3.0 CGP     | 54  | 3  | 0.5 | 6.5  | 0.0133 | 1 | 0.146 | COL3A1, DPYSL3, LAMA4                                                       |
| RRCCGTTA UNKNOWN                                          | TF           | others     |             | Genes with promoter regions [-2kb,2kb] around transcription start site containing motif RRCCGTTA. Motif does not match any known transcription factor                                              | MSigDBv3.0 TFT     | 54  | 3  | 0.5 | 6.5  | 0.0133 | 1 | 0.146 | ID1, MYH10, VIM                                                             |
| MACROMOLECULAR COMPLEX ASSEMBLY                           | others       |            |             | Genes annotated by the GO term GO:0065003. The aggregation, arrangement and bonding together of a set of macromolecules to form a complex.                                                         | MSigDBv3.0 BP      | 275 | 7  | 2.5 | 2.9  | 0.0136 | 1 | 0.149 | AGRN, CD9, GJA1, HSPB1, PTRF, SLC9A3R2, TJP1                                |
| BLUM RESPONSE TO SALIRASIB DN                             | tumor        | other      | salirasib   | Selected genes down-regulated in response to the Ras inhibitor salirasib [PubChem=5469318] in a panel of cancer cell lines with constantly active HRAS [Gene ID=3265].                             | MSigDBv3.0 CGP     | 342 | 8  | 3.1 | 2.7  | 0.0137 | 1 | 0.15  | CRIP2, DPYSL3, HSPB1, ID1, LTBP3, MEST, PLS3, WWTR1                         |
| KEGG REGULATION OF ACTIN CYTOSKELETON                     | cytoskeleton | related    |             | Regulation of actin cytoskeleton                                                                                                                                                                   | MSigDBv3.0 CP:KEGG | 213 | 6  | 2   | 3.2  | 0.0138 | 1 | 0.151 | FN1, ITGA6, ITGA9, ITGAV, ITGB4, MYH10                                      |
| MASSARWEH TAMOXIFEN RESISTANCE UP                         | tumor        | resistance | ER          | Genes up-regulated in breast cancer tumors (formed by MCF-7 xenografts) resistant to tamoxifen [PubChem=5376].                                                                                     | MSigDBv3.0 CGP     | 557 | 11 | 5.1 | 2.3  | 0.0138 | 1 | 0.151 | BCAM, CDH11, COL1A2, COL5A2, CXCR7, EDN1, EMP1, IL1R1, MUC1, SCARA3, TXNDC5 |
| V\$AP1 Q4                                                 | TF           | JUN        |             | Genes with promoter regions [-2kb,2kb] around transcription start site containing the motif RGTGACTMANN which matches annotation for JUN: jun oncogene                                             | MSigDBv3.0 TFT     | 213 | 6  | 2   | 3.2  | 0.0138 | 1 | 0.151 | CD151, DSTN, EDN1, LTBP3, SYNPO, VIM                                        |
| V\$LXR Q3                                                 | TF           | others     |             | Genes with promoter regions [-2kb,2kb] around transcription start site containing the motif TGGGGTYACTNCCGGTCA which matches annotation for NR1H3: nuclear receptor subfamily 1, group H, member 3 | MSigDBv3.0 TFT     | 55  | 3  | 0.5 | 6.3  | 0.014  | 1 | 0.152 | NRG1, PTMS, SULF1                                                           |
| GTCACC,MIR-380-5P                                         | microRNA     |            |             | Targets of MicroRNA GTCACC,MIR-380-5P                                                                                                                                                              | MSigDBv3.0 MIR     | 20  | 2  | 0.2 | 12.1 | 0.0142 | 1 | 0.154 | COL1A2, ITGA9                                                               |
| LIANG SILENCED BY METHYLATION UP                          | others       |            |             | Genes up-regulated in LD419 cells (fibroblast) after treatment with decitabine (5-aza-2'-deoxycytidine) [PubChem=451668].                                                                          | MSigDBv3.0 CGP     | 20  | 2  | 0.2 | 12.1 | 0.0142 | 1 | 0.154 | AQP1, IFI27                                                                 |
| MASRI RESISTANCE TO TAMOXIFEN AND AROMATASE INHIBITORS DN | tumor        | resistance | ER          | Genes down-regulated in derivatives of MCF-7aro cells (breast cancer) that developed resistance to tamoxifen [PubChem=5376] or inhibitors of aromatase (CYP19A1) [Gene ID=1588].                   | MSigDBv3.0 CGP     | 20  | 2  | 0.2 | 12.1 | 0.0142 | 1 | 0.154 | CTGF, EFEMP1                                                                |
| NEURON PROJECTION                                         | others       |            |             | Genes annotated by the GO term GO:0043005. A prolongation or process extending from a nerve cell, e.g. an axon or dendrite.                                                                        | MSigDBv3.0 CC      | 20  | 2  | 0.2 | 12.1 | 0.0142 | 1 | 0.154 | CDH13, SYNPO                                                                |
| VERRECCHIA RESPONSE TO TGFB1 C5                           | signaling    | TGFB       | ECM         | Cluster 5: ECM related genes up-regulated in dermal fibroblasts later than 30 min after TGFB1 [Gene ID=7040] addition; decreased slowly after the peak at 120 min time point.                      | MSigDBv3.0 CGP     | 20  | 2  | 0.2 | 12.1 | 0.0142 | 1 | 0.154 | MMP2, SEMA3F                                                                |

|                                              |              |              |                    |                                                                                                                                                                                                                                                                       |                |      |    |      |      |        |   |                                                                                                                                     |
|----------------------------------------------|--------------|--------------|--------------------|-----------------------------------------------------------------------------------------------------------------------------------------------------------------------------------------------------------------------------------------------------------------------|----------------|------|----|------|------|--------|---|-------------------------------------------------------------------------------------------------------------------------------------|
| KOBAYASHI EGFR SIGNALING 24HR UP             | tumor        | resistance   | CL-387785/EGFRi    | Genes up-regulated in H1975 cells (non-small cell lung cancer, NSCLC) resistant to gefitinib [PubChem=123631] after treatment with EGFR inhibitor CL-387785 [PubChem=2776] for 24h.                                                                                   | MSigDBv3.0 CGP | 102  | 4  | 0.9  | 4.5  | 0.0144 | 1 | 0.155 BCAM, HEG1, MAOA, MUC1                                                                                                        |
| CHIANG LIVER CANCER SUBCLASS UNANNOTATED DN  | tumor        | other        |                    | Marker genes down-regulated in the 'unannotated' subclass of hepatocellular carcinoma (HCC) samples.                                                                                                                                                                  | MSigDBv3.0 CGP | 156  | 5  | 1.4  | 3.7  | 0.0145 | 1 | 0.156 ATP1A1, GJA1, MAGED1, S100A10, SLC29A1                                                                                        |
| V\$CEBP C                                    | TF           | others       |                    | Genes with promoter regions [-2kb,2kb] around transcription start site containing the motif NGWVTKNKGYAAKNSAYA which matches annotation for CEBPA: CCAAT/enhancer binding protein (C/EBP), alpha                                                                      | MSigDBv3.0 TFT | 156  | 5  | 1.4  | 3.7  | 0.0145 | 1 | 0.156 CRIM1, CTGF, FSTL1, GATA4, ROBO4                                                                                              |
| CATTGTYY V\$SOX9 B1                          | TF           | Sox9         |                    | Genes with promoter regions [-2kb,2kb] around transcription start site containing the motif CATTGTYY which matches annotation for SOX9: SRY (sex determining region Y)-box 9 (campomelic dysplasia, autosomal sex-reversal)                                           | MSigDBv3.0 TFT | 279  | 7  | 2.6  | 2.9  | 0.0146 | 1 | 0.156 ADAM15, CD151, EDN1, GPR116, HSPG2, HYAL2, KIF1C                                                                              |
| BROWNE HCMV INFECTION 30MIN UP               | others       |              |                    | Genes up-regulated in primary fibroblast cell culture at 30 min time point after infection with HCMV (AD169 strain).                                                                                                                                                  | MSigDBv3.0 CGP | 56   | 3  | 0.5  | 6.2  | 0.0147 | 1 | 0.157 COL6A1, COL6A2, IFI27                                                                                                         |
| CCACACA, MIR-147                             | microRNA     |              |                    | Targets of MicroRNA CCACACA, MIR-147                                                                                                                                                                                                                                  | MSigDBv3.0 MIR | 56   | 3  | 0.5  | 6.2  | 0.0147 | 1 | 0.157 ATP1A1, GPRC5B, SEMA3F                                                                                                        |
| PEREZ TP53 TARGETS                           | TF           | TP53         | breast cells       | Genes up-regulated in the HMEC cells (primary mammary epithelium) upon expression of TP53 [Gene ID=7157] off adenoviral vector.                                                                                                                                       | MSigDBv3.0 CGP | 1123 | 18 | 10.3 | 1.9  | 0.0148 | 1 | 0.158 APCDD1, ARHGAP23, CCDC3, CGNL1, COL5A2, COL6A1, CRIP1, CRIP2, CXCR7, FGD5, FLNC, FOXC1, HEG1, ITGA9, LTBP3, MMP28, NTN1, VCAN |
| RUTELLA RESPONSE TO HGF VS CSF2RB AND IL4 UP | others       |              |                    | Genes up-regulated in peripheral blood mononucleocytes by HGF [Gene ID=3082] compared to those regulated by CSF2RB (GM-CSF) [Gene ID=1437] and IL4 [Gene ID=3565].                                                                                                    | MSigDBv3.0 CGP | 417  | 9  | 3.8  | 2.5  | 0.0149 | 1 | 0.159 CD9, CRIM1, EMP1, IGFBP7, MMP2, MYOF, PLTP, SCARB2, SERPINE1                                                                  |
| module 199                                   | others       |              |                    | Genes in module_199                                                                                                                                                                                                                                                   | MSigDBv3.0 CM  | 57   | 3  | 0.5  | 6.1  | 0.0154 | 1 | 0.163 LEPR, TEK, TIE1                                                                                                               |
| STRUCTURAL CONSTITUENT OF CYTOSKELETON       | cytoskeleton | related      |                    | Genes annotated by the GO term GO:0005200. The action of a molecule that contributes to the structural integrity of a cytoskeletal structure.                                                                                                                         | MSigDBv3.0 MF  | 57   | 3  | 0.5  | 6.1  | 0.0154 | 1 | 0.163 AGRN, SPTAN1, VIM                                                                                                             |
| FOURNIER ACINAR DEVELOPMENT EARLY UP         | signaling    | breast cells | acinar development | Genes up-regulated early in HMEC cells (mammary epithelium) during acinar development in vitro.                                                                                                                                                                       | MSigDBv3.0 CGP | 21   | 2  | 0.2  | 11.5 | 0.0156 | 1 | 0.165 EFEMP1, LEPR                                                                                                                  |
| LANDIS ERBB2 BREAST TUMORS 65 UP             | tumor        | breast       | ERBB2              | The 65 most significantly changed (p<0.01) genes out of the 324 genes identified by two analytical methods in the mammary tumors induced by transgenic expression of ERBB2 [Gene ID=2064].                                                                            | MSigDBv3.0 CGP | 21   | 2  | 0.2  | 11.5 | 0.0156 | 1 | 0.165 CD9, PERP                                                                                                                     |
| module 73                                    | others       |              |                    | Genes in module_73                                                                                                                                                                                                                                                    | MSigDBv3.0 CM  | 21   | 2  | 0.2  | 11.5 | 0.0156 | 1 | 0.165 IL1R1, IL1RL1                                                                                                                 |
| NGUYEN NOTCH1 TARGETS UP                     | others       |              |                    | Genes up-regulated in primary keratinocytes by expression of constantly active NOTCH1 [Gene ID=4851].                                                                                                                                                                 | MSigDBv3.0 CGP | 21   | 2  | 0.2  | 11.5 | 0.0156 | 1 | 0.165 ITGAV, LAMB2                                                                                                                  |
| TIAN TNF SIGNALING VIA NFKB                  | signaling    | NF-KB        |                    | Genes modulated in HeLa cells (cervical carcinoma) by TNF [Gene ID=7124] via NFKB pathway.                                                                                                                                                                            | MSigDBv3.0 CGP | 21   | 2  | 0.2  | 11.5 | 0.0156 | 1 | 0.165 CTGF, PLK2                                                                                                                    |
| NAGASHIMA EGF SIGNALING UP                   | signaling    | EGF          | MCF7               | Genes up-regulated in MCF7 cells (breast cancer) after stimulation with EGF [Gene ID=1950].                                                                                                                                                                           | MSigDBv3.0 CGP | 58   | 3  | 0.5  | 6    | 0.0161 | 1 | 0.17 CTGF, EDN1, ID1                                                                                                                |
| KIM WT1 TARGETS UP                           | tumor        | other        |                    | Genes up-regulated in UB27 cells (osteosarcoma) at any time point after inducing the expression of a mutant form of WT1 [Gene ID=7490].                                                                                                                               | MSigDBv3.0 CGP | 221  | 6  | 2    | 3.1  | 0.0163 | 1 | 0.171 FLNC, FOXC1, MYH10, SERPINE1, TM4SF1, WWTR1                                                                                   |
| V\$AP1 Q2 Q1                                 | TF           | JUN          |                    | Genes with promoter regions [-2kb,2kb] around transcription start site containing the motif TGACTCANN SKN which matches annotation for JUN: jun oncogene                                                                                                              | MSigDBv3.0 TFT | 221  | 6  | 2    | 3.1  | 0.0163 | 1 | 0.171 ADAM15, COL1A2, FLNC, LTBP3, PERP, TNXB                                                                                       |
| V\$AP1FJ Q2                                  | TF           | JUN          |                    | Genes with promoter regions [-2kb,2kb] around transcription start site containing the motif RSTGACTNMNW which matches annotation for JUN: jun oncogene                                                                                                                | MSigDBv3.0 TFT | 222  | 6  | 2    | 3.1  | 0.0166 | 1 | 0.174 DSTN, FLNC, ID1, LTBP3, SYNPO, VIM                                                                                            |
| DAVICIONI PAX FOXO1 SIGNATURE IN ARMS UP     | tumor        | other        |                    | 'PAX-FKHR signature': genes up-regulated by PAX3- or PAX7-FOXO1 [Gene ID=5081, 5077, 2308] fusion in primary alveolar rhabdomyosarcoma (ARMS) tumors.                                                                                                                 | MSigDBv3.0 CGP | 59   | 3  | 0.5  | 5.9  | 0.0169 | 1 | 0.176 CD9, CXCR7, SULF1                                                                                                             |
| I KAPPAB KINASE NF KAPPAB CASCADE            | signaling    | NF-KB        |                    | Genes annotated by the GO term GO:0007249. A series of reactions initiated by the activation of the transcription factor NF-kappaB. NF-kappaB is sequestered by the inhibitor I-kappaB, and is released when I-kappaB is phosphorylated by activated I-kappaB kinase. | MSigDBv3.0 BP  | 107  | 4  | 1    | 4.3  | 0.0169 | 1 | 0.176 ECM1, GJA1, PLK2, RHOC                                                                                                        |
| SAMOLS TARGETS OF KHSV MIRNAS DN             | tumor        | other        |                    | Genes down-regulated in 293 cells (embryonic kidney) upon expression of KHSV (Kaposi sarcoma-associated herpesvirus) microRNAs.                                                                                                                                       | MSigDBv3.0 CGP | 59   | 3  | 0.5  | 5.9  | 0.0169 | 1 | 0.176 DKK3, FN1, MAOA                                                                                                               |

|                                                         |              |       |       |                                                                                                                                                                                                                                                                                                                                                                                                                                                                                                                                                                                                                                                                                                                                 |                    |     |    |     |      |        |   |       |                                                                                          |
|---------------------------------------------------------|--------------|-------|-------|---------------------------------------------------------------------------------------------------------------------------------------------------------------------------------------------------------------------------------------------------------------------------------------------------------------------------------------------------------------------------------------------------------------------------------------------------------------------------------------------------------------------------------------------------------------------------------------------------------------------------------------------------------------------------------------------------------------------------------|--------------------|-----|----|-----|------|--------|---|-------|------------------------------------------------------------------------------------------|
| EPIDERMAL GROWTH FACTOR RECEPTOR SIGNALING PATHWAY      | signaling    |       |       | Genes annotated by the GO term GO:0007173. The series of molecular signals generated as a consequence of an epidermal growth factor receptor binding to one of its physiological ligands.                                                                                                                                                                                                                                                                                                                                                                                                                                                                                                                                       | MSigDBv3.0 BP      | 22  | 2  | 0.2 | 10.9 | 0.0171 | 1 | 0.177 | CDH13, EPS8                                                                              |
| MESODERM DEVELOPMENT                                    | others       |       |       | Genes annotated by the GO term GO:0007498. The process whose specific outcome is the progression of the mesoderm over time, from its formation to the mature structure. The mesoderm is the middle germ layer that develops into muscle, bone, cartilage, blood and connective tissue.                                                                                                                                                                                                                                                                                                                                                                                                                                          | MSigDBv3.0 BP      | 22  | 2  | 0.2 | 10.9 | 0.0171 | 1 | 0.177 | MEST, TIE1                                                                               |
| MISHRA CARCINOMA ASSOCIATED FIBROBLAST UP               | tumor        | other |       | Top genes up-regulated in mesenchyme stem cells (MSC) grown in a tumor conditioned medium, which leads to carcinoma-associated fibroblast phenotype.                                                                                                                                                                                                                                                                                                                                                                                                                                                                                                                                                                            | MSigDBv3.0 CGP     | 22  | 2  | 0.2 | 10.9 | 0.0171 | 1 | 0.177 | COL6A1, COL6A2                                                                           |
| REGULATION OF SMALL GTPASE MEDIATED SIGNAL TRANSDUCTION | signaling    |       |       | Genes annotated by the GO term GO:0051056. Any process that modulates the frequency, rate or extent of small GTPase mediated signal transduction.                                                                                                                                                                                                                                                                                                                                                                                                                                                                                                                                                                               | MSigDBv3.0 BP      | 22  | 2  | 0.2 | 10.9 | 0.0171 | 1 | 0.177 | CDC42BPB, FGD5                                                                           |
| RODRIGUES THYROID CARCINOMA ANAPLASTIC DN               | tumor        | other |       | Genes down-regulated in anaplastic thyroid carcinoma (ATC) compared to normal thyroid tissue.                                                                                                                                                                                                                                                                                                                                                                                                                                                                                                                                                                                                                                   | MSigDBv3.0 CGP     | 500 | 10 | 4.6 | 2.3  | 0.0171 | 1 | 0.177 | BCAM, CFH, ID1, IGFBP7, LPHN2, LRIG1, MMRN2, PODXL, PTPRB, SCARA3                        |
| BENPORATH OCT4 TARGETS                                  | TF           |       | 4-Oct | Set 'Oct4 targets': genes upregulated and identified by ChIP on chip as OCT4 [Gene ID=5460] transcription factor targets in human embryonic stem cells.                                                                                                                                                                                                                                                                                                                                                                                                                                                                                                                                                                         | MSigDBv3.0 CGP     | 289 | 7  | 2.6 | 2.8  | 0.0173 | 1 | 0.179 | CTGF, DPYSL3, GATA6, GJA1, LAMA4, MMP2, SULF1                                            |
| V\$AP1 C                                                | TF           |       | JUN   | Genes with promoter regions [-2kb,2kb] around transcription start site containing the motif NTGASTCAG which matches annotation for JUN: jun oncogene                                                                                                                                                                                                                                                                                                                                                                                                                                                                                                                                                                            | MSigDBv3.0 TFT     | 224 | 6  | 2.1 | 3    | 0.0173 | 1 | 0.179 | ADAM15, EMP1, FLNC, FSTL1, GJA1, LTBP3                                                   |
| module 136                                              | others       |       |       | Genes in module_136                                                                                                                                                                                                                                                                                                                                                                                                                                                                                                                                                                                                                                                                                                             | MSigDBv3.0 CM      | 430 | 9  | 3.9 | 2.4  | 0.0178 | 1 | 0.183 | CD9, CDH5, EDN1, GJA1, HYL2, IFI27, IL1RL1, KIAA1522, SCARA3                             |
| NEGATIVE REGULATION OF BIOLOGICAL PROCESS               | others       |       |       | Genes annotated by the GO term GO:0048519. Any process that stops, prevents or reduces the frequency, rate or extent of a biological process. Biological processes are regulated by many means; examples include the control of gene expression, protein modification or interaction with a protein or substrate molecule.                                                                                                                                                                                                                                                                                                                                                                                                      | MSigDBv3.0 BP      | 657 | 12 | 6   | 2.1  | 0.018  | 1 | 0.185 | ADAMTS1, CDH13, COL4A2, FOXC1, HSPB1, ID1, IGFBP7, MAGED1, NRG1, SERPINE1, STAB1, TXNDC5 |
| V\$HFH4 01                                              | TF           |       | FOXJ1 | Genes with promoter regions [-2kb,2kb] around transcription start site containing the motif AWKTGTTTGTTA which matches annotation for FOXJ1: forkhead box J1                                                                                                                                                                                                                                                                                                                                                                                                                                                                                                                                                                    | MSigDBv3.0 TFT     | 165 | 5  | 1.5 | 3.5  | 0.0181 | 1 | 0.185 | CRIM1, FSTL1, ID1, NRG1, NTN1                                                            |
| CYTOSKELETON                                            | cytoskeleton |       |       | Genes annotated by the GO term GO:0005856. Any of the various filamentous elements that form the internal framework of cells, and typically remain after treatment of the cells with mild detergent to remove membrane constituents and soluble components of the cytoplasm. The term embraces intermediate filaments, microfilaments, microtubules, the microtrabecular lattice, and other structures characterized by a polymeric filamentous nature and long-range order within the cell. The various elements of the cytoskeleton not only serve in the maintenance of cellular shape but also have roles in other cellular functions, including cellular movement, cell division, endocytosis, and movement of organelles. | MSigDBv3.0 CC      | 361 | 8  | 3.3 | 2.5  | 0.0184 | 1 | 0.188 | CDC42BPB, FLNB, FSCN1, HSPB1, MYH10, SPTAN1, SYNPO, VIM                                  |
| MASSARWEH RESPONSE TO ESTRADIOL                         | tumor        | other | ER    | Genes rapidly up-regulated in breast cancer cell cultures by estradiol [PubChem=5757].                                                                                                                                                                                                                                                                                                                                                                                                                                                                                                                                                                                                                                          | MSigDBv3.0 CGP     | 61  | 3  | 0.6 | 5.7  | 0.0184 | 1 | 0.188 | FLNB, LRIG1, MYOF                                                                        |
| module 176                                              | signaling    |       |       | Genes in module_176: signaling                                                                                                                                                                                                                                                                                                                                                                                                                                                                                                                                                                                                                                                                                                  | MSigDBv3.0 CM      | 227 | 6  | 2.1 | 3    | 0.0184 | 1 | 0.188 | CAV1, COL3A1, COL5A2, DPYSL3, LRRC32, NRG1                                               |
| PROTEIN COMPLEX ASSEMBLY                                | others       |       |       | Genes annotated by the GO term GO:0006461. The aggregation, arrangement and bonding together of a set of components to form a protein complex.                                                                                                                                                                                                                                                                                                                                                                                                                                                                                                                                                                                  | MSigDBv3.0 BP      | 166 | 5  | 1.5 | 3.4  | 0.0185 | 1 | 0.188 | AGRN, CD9, GJA1, SLC9A3R2, TJP1                                                          |
| chr6p24                                                 | others       |       |       | Genes in cytogenetic band chr6p24                                                                                                                                                                                                                                                                                                                                                                                                                                                                                                                                                                                                                                                                                               | MSigDBv3.0         | 23  | 2  | 0.2 | 10.4 | 0.0186 | 1 | 0.188 | BMP6, TXNDC5                                                                             |
| DACOSTA ERCC3 ALLELE XPCS VS TTD UP                     | others       |       |       | Genes up-regulated in fibroblasts expressing different mutant forms of ERCC3 [Gene ID=2071]: XP/CS (xeroderma pigmentosum (XP) and Cockraine's syndrome (CS)) vs TTD (trichothiodystrophy).                                                                                                                                                                                                                                                                                                                                                                                                                                                                                                                                     | MSigDBv3.0 CGP     | 23  | 2  | 0.2 | 10.4 | 0.0186 | 1 | 0.188 | MDK, MEST                                                                                |
| KEGG PROXIMAL TUBULE BICARBONATE RECLAMATION            | others       |       |       | Proximal tubule bicarbonate reclamation                                                                                                                                                                                                                                                                                                                                                                                                                                                                                                                                                                                                                                                                                         | MSigDBv3.0 CP:KEGG | 23  | 2  | 0.2 | 10.4 | 0.0186 | 1 | 0.188 | AQP1, ATP1A1                                                                             |

|                                                                 |           |           |            |                                                                                                                                                                                                                                              |                        |      |    |      |      |        |   |       |                                                                                                                                            |
|-----------------------------------------------------------------|-----------|-----------|------------|----------------------------------------------------------------------------------------------------------------------------------------------------------------------------------------------------------------------------------------------|------------------------|------|----|------|------|--------|---|-------|--------------------------------------------------------------------------------------------------------------------------------------------|
| TAVOR CEBPA TARGETS DN                                          | tumor     | other     |            | Genes down-regulated in KCL22 cells (chronic myelogenous leukemia, CML, with BCR-ABL1 [GeneID=613, 25] fusion) by expression of CEBPA [GeneID=1050].                                                                                         | MSigDBv3.0 CGP         | 23   | 2  | 0.2  | 10.4 | 0.0186 | 1 | 0.188 | GJA1, IFI27                                                                                                                                |
| ZHAN LATE DIFFERENTIATION GENES UP                              | others    |           |            | B lymphocyte late differentiation genes (LDG): top genes up-regulated in plasma cells from tonsils (TPC) compared to those from bone marrow (BPC).                                                                                           | MSigDBv3.0 CGP         | 23   | 2  | 0.2  | 10.4 | 0.0186 | 1 | 0.188 | BMP6, CAV1                                                                                                                                 |
| REACTOME PLATELET ACTIVATION                                    | others    |           |            | Genes involved in Platelet Activation                                                                                                                                                                                                        | MSigDBv3.0 CP:REACTOME | 167  | 5  | 1.5  | 3.4  | 0.0189 | 1 | 0.191 | CD9, COL1A2, FN1, GAS6, SERPINE1                                                                                                           |
| BRUECKNER TARGETS OF MIRLET7A3 UP                               | tumor     | other     |            | Genes up-regulated in A549 cells (lung cancer) expressing MIRLET7A3 [GeneID=406883] microRNA off a plasmid vector.                                                                                                                           | MSigDBv3.0 CGP         | 111  | 4  | 1    | 4.1  | 0.0191 | 1 | 0.192 | FOXC1, GJA1, PERP, VCAN                                                                                                                    |
| HOOI ST7 TARGETS DN                                             | tumor     | other     |            | Genes down-regulated in PC-3 cells (prostate cancer) stably expressing ST7 [Gene ID=7982] off a plasmid vector.                                                                                                                              | MSigDBv3.0 CGP         | 111  | 4  | 1    | 4.1  | 0.0191 | 1 | 0.192 | CRIP1, FN1, TM4SF1, VIM                                                                                                                    |
| module 493                                                      | others    |           |            | Genes in module_493                                                                                                                                                                                                                          | MSigDBv3.0 CM          | 62   | 3  | 0.6  | 5.6  | 0.0192 | 1 | 0.193 | GJA1, LAMA4, LAMB1                                                                                                                         |
| module 94                                                       | signaling |           |            | Genes in module_94: Signaling                                                                                                                                                                                                                | MSigDBv3.0 CM          | 364  | 8  | 3.3  | 2.5  | 0.0192 | 1 | 0.193 | CAV1, CDH5, COL5A2, ELN, EPS8, GPRC5B, IL1R1, ITGB4                                                                                        |
| module 180                                                      | others    |           |            | Genes in module_180                                                                                                                                                                                                                          | MSigDBv3.0 CM          | 112  | 4  | 1    | 4.1  | 0.0197 | 1 | 0.197 | BCAM, CD9, MDK, MUC1                                                                                                                       |
| DODD NASOPHARYNGEAL CARCINOMA DN                                | tumor     | other     |            | Genes down-regulated in nasopharyngeal carcinoma (NPC) compared to the normal tissue.                                                                                                                                                        | MSigDBv3.0 CGP         | 1332 | 20 | 12.2 | 1.7  | 0.0199 | 1 | 0.199 | BGN, CAV1, COL1A2, COL3A1, COL4A2, COL5A1, COL5A2, EPHB4, FBN1, FN1, FSCN1, GATA6, GJA1, ITGAV, LAMA4, LAMB1, POSTN, SERPINE1, SULF1, VCAN |
| BROWNE HCMV INFECTION 14HR DN                                   | others    |           |            | Genes down-regulated in primary fibroblast cell culture after infection with HCMV (AD169 strain) at 14 h time point that were not down-regulated at the previous time point, 12 h.                                                           | MSigDBv3.0 CGP         | 298  | 7  | 2.7  | 2.7  | 0.0201 | 1 | 0.2   | ANXA2, CDH13, CXCR7, LPHN2, PLEC, SERPINE1, TJP1                                                                                           |
| INTERCELLULAR JUNCTION                                          | ECM       | adhesion  |            | Genes annotated by the GO term GO:0005911. A specialized region of connection between two cells including but not limited to gap junctions, desmosomes, and tight junctions, but excluding direct cytoplasmic junctions such as ring canals. | MSigDBv3.0 CC          | 63   | 3  | 0.6  | 5.5  | 0.0201 | 1 | 0.2   | CDC42BPB, GJA1, TJP1                                                                                                                       |
| PROTEIN TYROSINE KINASE ACTIVITY                                | others    |           |            | Genes annotated by the GO term GO:0004713. Catalysis of the reaction: ATP + a protein tyrosine = ADP + protein tyrosine phosphate.                                                                                                           | MSigDBv3.0 MF          | 63   | 3  | 0.6  | 5.5  | 0.0201 | 1 | 0.2   | CRIM1, TEK, TIE1                                                                                                                           |
| KORKOLA EMBRYONIC CARCINOMA VS SEMINOMA UP                      | tumor     | other     |            | Top 25 most highly expressed genes in embryonic carcinoma relative to seminoma tumors.                                                                                                                                                       | MSigDBv3.0 CGP         | 24   | 2  | 0.2  | 9.9  | 0.0202 | 1 | 0.2   | GJA1, VCAN                                                                                                                                 |
| REACTOME SEMA4D INDUCED CELL MIGRATION AND GROWTH CONE COLLAPSE | EMT       | migration |            | Genes involved in Sema4D induced cell migration and growth-cone collapse                                                                                                                                                                     | MSigDBv3.0 CP:REACTOME | 24   | 2  | 0.2  | 9.9  | 0.0202 | 1 | 0.2   | MYH10, RHOC                                                                                                                                |
| V\$FREAC4 01                                                    | TF        | FOXD1     |            | Genes with promoter regions [-2kb,2kb] around transcription start site containing the motif CTWAWGTAAACANWGN which matches annotation for FOXD1: forkhead box D1                                                                             | MSigDBv3.0 TFT         | 113  | 4  | 1    | 4    | 0.0202 | 1 | 0.2   | ALDH1A2, EMP1, HSPG2, PLS3                                                                                                                 |
| WATTEL AUTONOMOUS THYROID ADENOMA DN                            | tumor     | other     |            | Down-regulated genes characteristic for autonomous thyroid adenoma.                                                                                                                                                                          | MSigDBv3.0 CGP         | 24   | 2  | 0.2  | 9.9  | 0.0202 | 1 | 0.2   | CAV1, IL1RL1                                                                                                                               |
| ZUCCHI METASTASIS UP                                            | tumor     | breast    | metastasis | The 50 most up-regulated genes in primary invasive breast ductal carcinoma (IDC) or lymph node metastases, compared to normal mammary epithelium.                                                                                            | MSigDBv3.0 CGP         | 24   | 2  | 0.2  | 9.9  | 0.0202 | 1 | 0.2   | CTGF, FSCN1                                                                                                                                |
| chr14q32                                                        | others    |           |            | Genes in cytogenetic band chr14q32                                                                                                                                                                                                           | MSigDBv3.0             | 114  | 4  | 1    | 4    | 0.0208 | 1 | 0.205 | CDC42BPB, CRIP1, CRIP2, IFI27                                                                                                              |
| module 397                                                      | others    |           |            | Genes in module_397                                                                                                                                                                                                                          | MSigDBv3.0 CM          | 114  | 4  | 1    | 4    | 0.0208 | 1 | 0.205 | EPHB4, LAMB1, SEMA3F, TJP1                                                                                                                 |
| DEURIG T CELL PROLYMPHOCYTIC LEUKEMIA UP                        | tumor     | other     |            | Genes up-regulated in T-PLL cells (T-cell prolymphocytic leukemia) bearing the inv(14)/t(14:14) chromosomal aberration.                                                                                                                      | MSigDBv3.0 CGP         | 370  | 8  | 3.4  | 2.5  | 0.0209 | 1 | 0.206 | ANGPTL2, COL6A2, EPHB4, FAM38A, FN1, IGFBP7, LAMB2, MEST                                                                                   |
| CELL PROJECTION BIOGENESIS                                      | others    |           |            | Genes annotated by the GO term GO:0030031. Formation of a prolongation or process extending from a cell, e.g. a flagellum or axon.                                                                                                           | MSigDBv3.0 BP          | 25   | 2  | 0.2  | 9.5  | 0.0218 | 1 | 0.213 | CDH13, FGD5                                                                                                                                |



|                                                  |           |            |            |                                                                                                                                                                                                                   |                        |     |    |     |     |        |   |                                                                                           |
|--------------------------------------------------|-----------|------------|------------|-------------------------------------------------------------------------------------------------------------------------------------------------------------------------------------------------------------------|------------------------|-----|----|-----|-----|--------|---|-------------------------------------------------------------------------------------------|
| REACTOME BASIGIN INTERACTIONS                    | others    |            |            | Genes involved in Basigin interactions                                                                                                                                                                            | MSigDBv3.0 CP:REACTOME | 25  | 2  | 0.2 | 9.5 | 0.0218 | 1 | 0.213 CAV1, ITGA6                                                                         |
| RICKMAN TUMOR DIFFERENTIATED WELL VS POORLY DN   | tumor     | other      | aggressive | Down-regulated genes that vary between HNSCC (head and neck squamous cell carcinoma) groups formed on the basis of their level of pathological differentiation: well vs poorly differentiated tumors.             | MSigDBv3.0 CGP         | 373 | 8  | 3.4 | 2.4 | 0.0218 | 1 | 0.213 DOCK6, EHD2, NRG1, PERP, PLS3, PPP2R5B, PTRF, SYNPO                                 |
| WANG BARRETTES ESOPHAGUS AND ESOPHAGUS CANCER UP | tumor     | other      |            | Genes up-regulated in esophageal adenocarcinoma (EAC) and Barret's esophagus (BE) relative to normal esophagi.                                                                                                    | MSigDBv3.0 CGP         | 25  | 2  | 0.2 | 9.5 | 0.0218 | 1 | 0.213 COL4A2, CRIP1                                                                       |
| WEINMANN ADAPTATION TO HYPOXIA UP                | signaling | hypoxia    |            | Genes most up-regulated in hypoxia tolerant NCI H460 cells (lung cancer).                                                                                                                                         | MSigDBv3.0 CGP         | 25  | 2  | 0.2 | 9.5 | 0.0218 | 1 | 0.213 IGFBP7, MEST                                                                        |
| DITTMER PTHLH TARGETS UP                         | tumor     | other      |            | Genes up-regulated in MDA-MB-231 cells (breast cancer) after knockdown of PTHLH [Gene ID=5744] by RNAi.                                                                                                           | MSigDBv3.0 CGP         | 116 | 4  | 1.1 | 3.9 | 0.022  | 1 | 0.214 ATP1A1, COL4A2, COL6A1, ECM1                                                        |
| V\$PAX5 01                                       | TF        | others     |            | Genes with promoter regions [-2kb,2kb] around transcription start site containing the motif BCNNNRNGCANBGNTGNRTAGCSGCHNB which matches annotation for PAX5: paired box gene 5 (B-cell lineage specific activator) | MSigDBv3.0 TFT         | 116 | 4  | 1.1 | 3.9 | 0.022  | 1 | 0.214 ANGPTL2, FLNC, MYH10, NRG1                                                          |
| LIAO METASTASIS                                  | tumor     | other      | metastasis | Genes up-regulated in the samples with intrahepatic metastatic hepatocellular carcinoma (HCC) vs primary HCC.                                                                                                     | MSigDBv3.0 CGP         | 522 | 10 | 4.8 | 2.2 | 0.0223 | 1 | 0.216 AGRN, ANXA2, COL1A2, EHD2, GPRC5B, KIAA1522, LAMB1, SEMA3F, SERPINE2, VCAN          |
| FERNANDEZ BOUND BY MYC                           | TF        | MYC        | CHIP       | Genes identified by ChIP within the high-affinity group of MYC [Gene ID=4609] targets.                                                                                                                            | MSigDBv3.0 CGP         | 175 | 5  | 1.6 | 3.2 | 0.0226 | 1 | 0.218 COL4A2, ITGA6, MUC1, SERPINE1, SLC9A3R2                                             |
| GCANCTGNY V\$MYOD Q6                             | TF        | others     |            | Genes with promoter regions [-2kb,2kb] around transcription start site containing the motif GCANCTGNY which matches annotation for MYOD1: myogenic differentiation 1                                              | MSigDBv3.0 TFT         | 679 | 12 | 6.2 | 2   | 0.0226 | 1 | 0.218 BMP6, CDH13, CRIP2, HYAL2, ID1, ITGB4, MAGED1, MYH10, NRG1, PPP2R5B, TJP1, TNFRSF21 |
| TAKEDA TARGETS OF NUP98 HOXA9 FUSION 16D UP      | others    |            |            | Genes up-regulated in CD34+ [Gene ID=947] hematopoietic cells by expression of NUP98-HOXA9 fusion [Gene ID=4928, 3205] off a retroviral vector at 16 days after transduction.                                     | MSigDBv3.0 CGP         | 175 | 5  | 1.6 | 3.2 | 0.0226 | 1 | 0.218 APCDD1, FLNB, FN1, IFI27, NRG1                                                      |
| chr2q31                                          | others    |            |            | Genes in cytogenetic band chr2q31                                                                                                                                                                                 | MSigDBv3.0             | 66  | 3  | 0.6 | 5.2 | 0.0227 | 1 | 0.218 COL3A1, ITGA6, ITGAV                                                                |
| FALVELLA SMOKERS WITH LUNG CANCER                | tumor     | other      |            | Genes that distinguish normal from cancer (lung adenocarcinoma) samples and smokers from non-smoking subjects.                                                                                                    | MSigDBv3.0 CGP         | 66  | 3  | 0.6 | 5.2 | 0.0227 | 1 | 0.218 ADAMTS1, ENG, SERPINE1                                                              |
| HINATA NFKB TARGETS FIBROBLAST UP                | signaling | NF-KB      |            | Genes up-regulated in primary fibroblast cells by expression of p50 (NFKB1) and p65 (RELA) [Gene ID=4790, 5970] components of NFKB.                                                                               | MSigDBv3.0 CGP         | 66  | 3  | 0.6 | 5.2 | 0.0227 | 1 | 0.218 CD9, FN1, VIM                                                                       |
| V\$SMAD4 Q6                                      | TF        | SMAD4      |            | Genes with promoter regions [-2kb,2kb] around transcription start site containing the motif GKSRRKKGAMCANCY which matches annotation for SMAD4: SMAD, mothers against DPP homolog 4 (Drosophila)                  | MSigDBv3.0 TFT         | 176 | 5  | 1.6 | 3.2 | 0.0231 | 1 | 0.222 CDH13, COL1A2, FAM38A, HYAL2, SULF1                                                 |
| TGATTRY V\$GFI1 01                               | TF        | others     |            | Genes with promoter regions [-2kb,2kb] around transcription start site containing the motif TGATTRY which matches annotation for GFI1: growth factor independent 1                                                | MSigDBv3.0 TFT         | 240 | 6  | 2.2 | 2.8 | 0.0234 | 1 | 0.223 ALDH1A2, ANXA2, CDH13, CRIM1, FN1, SLC02A1                                          |
| CHIANG LIVER CANCER SUBCLASS INTERFERON UP       | tumor     | other      |            | All marker genes up-regulated in the 'interferon' subclass of hepatocellular carcinoma (HCC).                                                                                                                     | MSigDBv3.0 CGP         | 26  | 2  | 0.2 | 9.1 | 0.0235 | 1 | 0.223 IFI27, PLA2G2A                                                                      |
| LI CISPLATIN RESISTANCE UP                       | tumor     | resistance | cisplatin  | Genes consistently up-regulated in ACRP cells (ovarian cancer, resistant to cisplatin [PubChem=2767]) compared to the parental sensitive A2780 cells, regardless of cisplatin exposure.                           | MSigDBv3.0 CGP         | 26  | 2  | 0.2 | 9.1 | 0.0235 | 1 | 0.223 GJA1, LPHN2                                                                         |
| REGULATION OF ANGIOGENESIS                       | others    |            |            | Genes annotated by the GO term GO:0045765. Any process that modulates the frequency, rate or extent of angiogenesis.                                                                                              | MSigDBv3.0 BP          | 26  | 2  | 0.2 | 9.1 | 0.0235 | 1 | 0.223 COL4A2, STAB1                                                                       |
| AKL HTLV1 INFECTION DN                           | others    |            |            | Genes down-regulated in WE17/10 cells (CD4+ [Gene ID=920] T lymphocytes) infected by HTLV1 (and thus displaying low CD7 [Gene ID=924]) compared to the uninfected (i.e., CD7+) cells.                             | MSigDBv3.0 CGP         | 67  | 3  | 0.6 | 5.1 | 0.0236 | 1 | 0.223 IGFBP7, LPHN2, MAOA                                                                 |
| GGARNTKYCCA UNKNOWN                              | TF        | others     |            | Genes with promoter regions [-2kb,2kb] around transcription start site containing motif GGARNTKYCCA. Motif does not match any known transcription factor                                                          | MSigDBv3.0 TFT         | 67  | 3  | 0.6 | 5.1 | 0.0236 | 1 | 0.223 COL1A2, HSPG2, NPDC1                                                                |
| NAGASHIMA NRG1 SIGNALING UP                      | tumor     | other      | ERBB2      | Genes up-regulated in MCF7 cells (breast cancer) after stimulation with NRG1 [Gene ID=3084].                                                                                                                      | MSigDBv3.0 CGP         | 177 | 5  | 1.6 | 3.2 | 0.0236 | 1 | 0.223 CTGF, EDN1, GATA6, ID1, TNFRSF21                                                    |

|                                          |           |                   |                   |                                                                                                                                                                                                                                                          |                    |      |    |      |     |        |   |                                                                                                                                                                                                         |
|------------------------------------------|-----------|-------------------|-------------------|----------------------------------------------------------------------------------------------------------------------------------------------------------------------------------------------------------------------------------------------------------|--------------------|------|----|------|-----|--------|---|---------------------------------------------------------------------------------------------------------------------------------------------------------------------------------------------------------|
| RIGGINS TAMOXIFEN RESISTANCE UP          | tumor     | resistance        | ER                | Genes up-regulated SUM44/LCCTam cells (breast cancer) resistant to 4-hydroxytamoxifen [PubChem=63062] relative to the parental SUM44 cells sensitive to the drug.                                                                                        | MSigDBv3.0 CGP     | 67   | 3  | 0.6  | 5.1 | 0.0236 | 1 | 0.223 GATA4, LAMA4, SLCO2A1                                                                                                                                                                             |
| V\$CIZ 01                                | TF        | others            |                   | Genes with promoter regions [-2kb,2kb] around transcription start site containing the motif SAAAAANN which matches annotation for ZNF384: zinc finger protein 384                                                                                        | MSigDBv3.0 TFT     | 177  | 5  | 1.6  | 3.2 | 0.0236 | 1 | 0.223 COL3A1, MMP2, SEMA3F, SSSCA1, TXNDC5                                                                                                                                                              |
| V\$FOXJ2 02                              | TF        | FOXJ2             |                   | Genes with promoter regions [-2kb,2kb] around transcription start site containing the motif AYMATAATATTTKN which matches annotation for FOXJ2: forkhead box J2                                                                                           | MSigDBv3.0 TFT     | 177  | 5  | 1.6  | 3.2 | 0.0236 | 1 | 0.223 CRIM1, EDN1, EFEMP1, ID1, IGFBP7                                                                                                                                                                  |
| V\$SMAD3 Q6                              | TF        | SMAD3             |                   | Genes with promoter regions [-2kb,2kb] around transcription start site containing the motif TGCTGTCT which matches annotation for SMAD3: SMAD, mothers against DPP homolog 3 (Drosophila)                                                                | MSigDBv3.0 TFT     | 177  | 5  | 1.6  | 3.2 | 0.0236 | 1 | 0.223 EDN1, MRC2, NOS3, S100A16, SYNPO                                                                                                                                                                  |
| VANHARANTA UTERINE FIBROID DN            | others    |                   |                   | Genes down-regulated in uterine fibroids vs normal myometrium samples.                                                                                                                                                                                   | MSigDBv3.0 CGP     | 67   | 3  | 0.6  | 5.1 | 0.0236 | 1 | 0.223 CXCR7, LEPR, TNXB                                                                                                                                                                                 |
| BENPORATH ES WITH H3K27ME3               | others    |                   | H3K27me3          | Set 'H3K27 bound': genes possessing the trimethylated H3K27 (H3K27me3) mark in their promoters in human embryonic stem cells, as identified by ChIP on chip.                                                                                             | MSigDBv3.0 CGP     | 1097 | 17 | 10   | 1.8 | 0.0237 | 1 | 0.223 ADAM15, BMP6, CD34, CRIP1, DKK2, FBN1, FOXC1, GATA4, GATA6, LAMB1, MMP2, NRG1, NTN1, PLEC, SFRP5, SLCO2A1, TPPP3                                                                                  |
| GGGCGGR V\$SP1 Q6                        | TF        | others            |                   | Genes with promoter regions [-2kb,2kb] around transcription start site containing the motif GGGCGGR which matches annotation for SP1: Sp1 transcription factor                                                                                           | MSigDBv3.0 TFT     | 2171 | 29 | 19.9 | 1.6 | 0.0237 | 1 | 0.223 CD9, COL1A2, CRIP1, DKK2, ELN, GATA6, HSPB1, HYAL2, IGFBP7, ITGA6, KIF1C, LEPR, MAOA, MUC1, MYH10, NFE2L1, NPDC1, NTN1, PKHD1L1, PLK2, PLS3, PLTP, PTMS, PTRF, PVRL2, SPTAN1, TJP1, TNFRSF21, VIM |
| BENPORATH NOS TARGETS                    | TF        | NANAG, OCT4, SOX2 | CHIP              | Set 'NOS targets': genes upregulated and identified by ChIP on chip as targets of the transcription factors NANOG [Gene ID=79923], OCT4[Gene ID=5460], and Sox2 [Gene ID=6657] (NOS) in human embryonic stem cells.                                      | MSigDBv3.0 CGP     | 178  | 5  | 1.6  | 3.2 | 0.0241 | 1 | 0.227 CTGF, DPYSL3, GJA1, LAMA4, SULF1                                                                                                                                                                  |
| HAHTOLA MYCOSIS FUNGOIDES SKIN UP        | others    |                   |                   | Genes up-regulated in lesional skin biopsies from mycosis fungoides patients compared to the normal skin samples.                                                                                                                                        | MSigDBv3.0 CGP     | 178  | 5  | 1.6  | 3.2 | 0.0241 | 1 | 0.227 CFH, CRIM1, SPTAN1, TM4SF1, TXNDC5                                                                                                                                                                |
| KEGG COMPLEMENT AND COAGULATION CASCADES | others    |                   |                   | Complement and coagulation cascades                                                                                                                                                                                                                      | MSigDBv3.0 CP:KEGG | 68   | 3  | 0.6  | 5.1 | 0.0245 | 1 | 0.23 CD59, CFH, SERPINE1                                                                                                                                                                                |
| BENPORATH SUZ12 TARGETS                  | signaling | SUZ12             | CHIP              | Set 'Suz12 targets': genes identified by ChIP on chip as targets of the Polycomb protein SUZ12 [Gene ID=23512] in human embryonic stem cells.                                                                                                            | MSigDBv3.0 CGP     | 1017 | 16 | 9.3  | 1.8 | 0.0246 | 1 | 0.231 CD34, CDH11, CDH13, CRIP1, DKK2, EPS8, FBN1, GATA4, GATA6, NRG1, NTN1, PLEC, PLS3, SFRP5, SLCO2A1, TPPP3                                                                                          |
| AMUNDSON RESPONSE TO ARSENITE            | others    |                   |                   | Genes discriminating responses to sodium arsenite [PubChem ID=26435] from other stresses.                                                                                                                                                                | MSigDBv3.0 CGP     | 180  | 5  | 1.6  | 3.2 | 0.0252 | 1 | 0.234 HYAL2, LEPR, NFE2L1, PLTP, PTPRB                                                                                                                                                                  |
| METALLOENDOPEPTIDASE ACTIVITY            | others    |                   |                   | Genes annotated by the GO term GO:0004222. Catalysis of the hydrolysis of nonterminal peptide linkages in oligopeptides or polypeptides. Enzymes of this class contain a chelated metal ion essential to their catalytic activity at their active sites. | MSigDBv3.0 MF      | 27   | 2  | 0.2  | 8.7 | 0.0252 | 1 | 0.234 MMP2, MMP28                                                                                                                                                                                       |
| module 200                               | others    |                   |                   | Genes in module_200                                                                                                                                                                                                                                      | MSigDBv3.0 CM      | 27   | 2  | 0.2  | 8.7 | 0.0252 | 1 | 0.234 NRG1, TEK                                                                                                                                                                                         |
| OHM METHYLATED IN ADULT CANCERS          | tumor     | other             |                   | Genes showing frequent DNA methylation and which are silenced in adult cancers but remain unmethylated in embryonic carcinoma and embryonic stem (ES) cells.                                                                                             | MSigDBv3.0 CGP     | 27   | 2  | 0.2  | 8.7 | 0.0252 | 1 | 0.234 GATA4, SFRP5                                                                                                                                                                                      |
| OLSSON E2F3 TARGETS DN                   | tumor     | other             |                   | Genes down-regulated in the 5637 cell line (bladder cancer) after knockdown of E2F3 [Gene ID=1871] by RNAi.                                                                                                                                              | MSigDBv3.0 CGP     | 27   | 2  | 0.2  | 8.7 | 0.0252 | 1 | 0.234 EDN1, VIM                                                                                                                                                                                         |
| REGULATION OF CELL MIGRATION             | EMT       | migration         |                   | Genes annotated by the GO term GO:0030334. Any process that modulates the frequency, rate or extent of cell migration.                                                                                                                                   | MSigDBv3.0 BP      | 27   | 2  | 0.2  | 8.7 | 0.0252 | 1 | 0.234 CDH13, LAMB1                                                                                                                                                                                      |
| XU GH1 AUTOCRINE TARGETS DN              | tumor     | other             |                   | Genes down-regulated in MFCF-7 cells (breast cancer) upon stable autocrine expression of HG1 [Gene ID=2688].                                                                                                                                             | MSigDBv3.0 CGP     | 121  | 4  | 1.1  | 3.8 | 0.0253 | 1 | 0.234 PLK2, PODXL, SULF1, TJP1                                                                                                                                                                          |
| chr8p21                                  | others    |                   |                   | Genes in cytogenetic band chr8p21                                                                                                                                                                                                                        | MSigDBv3.0         | 69   | 3  | 0.6  | 5   | 0.0255 | 1 | 0.235 LOXL2, NRG1, SCARA3                                                                                                                                                                               |
| ENGELMANN CANCER PROGENITORS DN          | tumor     | other             | cancer stem cells | Down-regulated genes in the cancer progenitor (stem) cells corresponding to side population (SP) MCF7 cells (breast cancer) positive for MUC1 [Gene ID=4582].                                                                                            | MSigDBv3.0 CGP     | 69   | 3  | 0.6  | 5   | 0.0255 | 1 | 0.235 CTGF, FN1, ID1                                                                                                                                                                                    |
| V\$SP1 01                                | TF        | others            |                   | Genes with promoter regions [-2kb,2kb] around transcription start site containing the motif GGGGCGGGT which matches annotation for SP1: Sp1 transcription factor                                                                                         | MSigDBv3.0 TFT     | 182  | 5  | 1.7  | 3.1 | 0.0262 | 1 | 0.242 HYAL2, KIF1C, MAGED1, MUC1, NFE2L1                                                                                                                                                                |

|                                               |           |                 |                                                                                                                                                                                                                                                                                                                                                                                                                                      |                |     |   |     |     |        |   |                                           |
|-----------------------------------------------|-----------|-----------------|--------------------------------------------------------------------------------------------------------------------------------------------------------------------------------------------------------------------------------------------------------------------------------------------------------------------------------------------------------------------------------------------------------------------------------------|----------------|-----|---|-----|-----|--------|---|-------------------------------------------|
| EPIDERMIS DEVELOPMENT                         | others    |                 | Genes annotated by the GO term GO:0008544. The process whose specific outcome is the progression of the epidermis over time, from its formation to the mature structure. The epidermis is the outer epithelial layer of a plant or animal, it may be a single layer that produces an extracellular material (e.g. the cuticle of arthropods) or a complex stratified squamous epithelium, as in the case of many vertebrate species. | MSigDBv3.0 BP  | 70  | 3 | 0.6 | 4.9 | 0.0264 | 1 | 0.244 COL5A2, CTGF, EMP1                  |
| COLIN PILOCYTIC ASTROCYTOMA VS GLOBLASTOMA DN | tumor     | other           | Genes down-regulated in pilocytic astrocytoma compared to glioblastoma samples.                                                                                                                                                                                                                                                                                                                                                      | MSigDBv3.0 CGP | 28  | 2 | 0.3 | 8.4 | 0.027  | 1 | 0.246 ANXA2, FN1                          |
| DACOSTA ERCC3 ALLELE XPCS VS TTD DN           | others    |                 | Genes down-regulated in fibroblasts expressing different mutant forms of ERCC3 [Gene ID=2071]: XP/CS (xeroderma pigmentosum (XP) and Cockraine's syndrome (CS)) vs TTD (trichothiodystrophy).                                                                                                                                                                                                                                        | MSigDBv3.0 CGP | 28  | 2 | 0.3 | 8.4 | 0.027  | 1 | 0.246 COL1A2, VCAN                        |
| LI PROSTATE CANCER EPIGENETIC                 | tumor     | other           | Genes affected by epigenetic aberrations in prostate cancer.                                                                                                                                                                                                                                                                                                                                                                         | MSigDBv3.0 CGP | 28  | 2 | 0.3 | 8.4 | 0.027  | 1 | 0.246 CAV1, CDH13                         |
| LIPID TRANSPORT                               | ECM       | adhesion        | Genes annotated by the GO term GO:0006869. The directed movement of lipids into, out of, within or between cells. Lipids are compounds soluble in an organic solvent but not, or sparingly, in an aqueous solvent.                                                                                                                                                                                                                   | MSigDBv3.0 BP  | 28  | 2 | 0.3 | 8.4 | 0.027  | 1 | 0.246 CAV1, SLCO2A1                       |
| module 202                                    | others    |                 | Genes in module_202                                                                                                                                                                                                                                                                                                                                                                                                                  | MSigDBv3.0 CM  | 28  | 2 | 0.3 | 8.4 | 0.027  | 1 | 0.246 DSTN, FLNB                          |
| module 210                                    | others    |                 | Genes in module_210                                                                                                                                                                                                                                                                                                                                                                                                                  | MSigDBv3.0 CM  | 28  | 2 | 0.3 | 8.4 | 0.027  | 1 | 0.246 ADAM15, MMP2                        |
| module 330                                    | others    |                 | Genes in module_330                                                                                                                                                                                                                                                                                                                                                                                                                  | MSigDBv3.0 CM  | 28  | 2 | 0.3 | 8.4 | 0.027  | 1 | 0.246 DSTN, GJA1                          |
| TING SILENCED BY DICER                        | tumor     | other           | Epigenetically silenced genes up-regulated in HCT116 cells (colon cancer) hypomorphic for DICER1 [Gene ID=23405].                                                                                                                                                                                                                                                                                                                    | MSigDBv3.0 CGP | 28  | 2 | 0.3 | 8.4 | 0.027  | 1 | 0.246 TM4SF1, VIM                         |
| RESPONSE TO WOUNDING                          | others    | damage response | Genes annotated by the GO term GO:0009611. A change in state or activity of a cell or an organism (in terms of movement, secretion, enzyme production, gene expression, etc.) as a result of a stimulus indicating damage to the organism.                                                                                                                                                                                           | MSigDBv3.0 BP  | 184 | 5 | 1.7 | 3.1 | 0.0273 | 1 | 0.248 CD59, CTGF, MDK, NFE2L1, SERPINE1   |
| V\$ARP1 01                                    | TF        | others          | Genes with promoter regions [-2kb,2kb] around transcription start site containing the motif TGARCCYTTGAMCCCW which matches annotation for PITX2: paired-like homeodomain transcription factor 2                                                                                                                                                                                                                                      | MSigDBv3.0 TFT | 124 | 4 | 1.1 | 3.7 | 0.0273 | 1 | 0.248 CTGF, EMP1, LTBP3, MMP28            |
| V\$MYOD Q6 01                                 | TF        | others          | Genes with promoter regions [-2kb,2kb] around transcription start site containing the motif CNGNRNCAGGTGNNGNAN which matches annotation for MYOD1: myogenic differentiation 1                                                                                                                                                                                                                                                        | MSigDBv3.0 TFT | 184 | 5 | 1.7 | 3.1 | 0.0273 | 1 | 0.248 DOCK6, HYAL2, ITGA6, SEMA3F, SPTAN1 |
| HINATA NFKB TARGETS KERATINOCYTE UP           | signaling | NF-KB           | Genes up-regulated in primary keratinocytes by expression of p50 (NFKB1) and p65 (RELA) [Gene ID=4790, 5970] components of NFKB.                                                                                                                                                                                                                                                                                                     | MSigDBv3.0 CGP | 71  | 3 | 0.7 | 4.8 | 0.0274 | 1 | 0.248 CD9, FN1, VIM                       |
| RODRIGUES THYROID CARCINOMA DN                | tumor     | other           | Genes down-regulated in poorly differentiated thyroid carcinoma (PDTTC) compared to anaplastic thyroid carcinoma (ATC).                                                                                                                                                                                                                                                                                                              | MSigDBv3.0 CGP | 71  | 3 | 0.7 | 4.8 | 0.0274 | 1 | 0.248 FN1, PLEC, S100A10                  |

**Table S7. The list of genes that demonstrate overlap between the 170 genes and the core EMT signature (17).**

| <b>symbol</b> | <b>Entrez<br/>GeneID</b> | <b>descr</b>                                                                              |
|---------------|--------------------------|-------------------------------------------------------------------------------------------|
| CTGF          | 1490                     | Connective tissue growth factor                                                           |
| COL3A1        | 1281                     | Collagen, type III, alpha 1                                                               |
| POSTN         | 10631                    | Periostin, osteoblast specific factor                                                     |
| COL1A2        | 1278                     | Collagen, type I, alpha 2                                                                 |
| MMP2          | 4313                     | Matrix metalloproteinase 2 (gelatinase A, 72kDa gelatinase,<br>72kDa type IV collagenase) |
| CDH11         | 1009                     | Cadherin 11, type 2, OB-cadherin (osteoblast)                                             |
| FSTL1         | 11167                    | Follistatin-like 1                                                                        |
| ECM1          | 1893                     | Extracellular matrix protein 1                                                            |
| BGN           | 633                      | Biglycan                                                                                  |
| COL5A2        | 1290                     | Collagen, type V, alpha 2                                                                 |
| VIM           | 7431                     | Vimentin                                                                                  |

## References

1. D. X. Nguyen, P. D. Bos, J. Massagué, Metastasis: From dissemination to organ-specific colonization. *Nat. Rev. Cancer* **9**, 274 (2009). [doi:10.1038/nrc2622](https://doi.org/10.1038/nrc2622) [Medline](#)
2. J. P. Thiery, Epithelial-mesenchymal transitions in tumour progression. *Nat. Rev. Cancer* **2**, 442 (2002). [doi:10.1038/nrc822](https://doi.org/10.1038/nrc822) [Medline](#)
3. R. Kalluri, R. A. Weinberg, The basics of epithelial-mesenchymal transition. *J. Clin. Invest.* **119**, 1420 (2009). [doi:10.1172/JCI39104](https://doi.org/10.1172/JCI39104) [Medline](#)
4. T. Brabletz, To differentiate or not: Routes towards metastasis. *Nat. Rev. Cancer* **12**, 425 (2012). [doi:10.1038/nrc3265](https://doi.org/10.1038/nrc3265) [Medline](#)
5. H. Ledford, Cancer theory faces doubts. *Nature* **472**, 273 (2011). [doi:10.1038/472273a](https://doi.org/10.1038/472273a) [Medline](#)
6. K. Pantel, R. H. Brakenhoff, B. Brandt, Detection, clinical relevance and specific biological properties of disseminating tumour cells. *Nat. Rev. Cancer* **8**, 329 (2008). [doi:10.1038/nrc2375](https://doi.org/10.1038/nrc2375) [Medline](#)
7. M. Yu, S. Stott, M. Toner, S. Maheswaran, D. A. Haber, Circulating tumor cells: approaches to isolation and characterization. *J. Cell Biol.* **192**, 373 (2011). [doi:10.1083/jcb.201010021](https://doi.org/10.1083/jcb.201010021) [Medline](#)
8. H. Jeong, Y. J. Ryu, J. An, Y. Lee, A. Kim, Epithelial-mesenchymal transition in breast cancer correlates with high histological grade and triple-negative phenotype. *Histopathology* **60**, (6B), E87 (2012). [doi:10.1111/j.1365-2559.2012.04195.x](https://doi.org/10.1111/j.1365-2559.2012.04195.x) [Medline](#)
9. Z. Jiang *et al.*, RB1 and p53 at the crossroad of EMT and triple-negative breast cancer. *Cell Cycle* **10**, 1563 (2011). [doi:10.4161/cc.10.10.15703](https://doi.org/10.4161/cc.10.10.15703) [Medline](#)
10. S. L. Stott *et al.*, Isolation of circulating tumor cells using a microvortex-generating herringbone-chip. *Proc. Natl. Acad. Sci. U.S.A.* **107**, 18392 (2010). [doi:10.1073/pnas.1012539107](https://doi.org/10.1073/pnas.1012539107) [Medline](#)
11. M. Yu *et al.*, A developmentally regulated inducer of EMT, LBX1, contributes to breast cancer progression. *Genes Dev.* **23**, 1737 (2009). [doi:10.1101/gad.1809309](https://doi.org/10.1101/gad.1809309) [Medline](#)
12. R. E. Payne *et al.*, Viable circulating tumour cell detection using multiplex RNA in situ hybridisation predicts progression-free survival in metastatic breast cancer patients. *Br. J. Cancer* **106**, 1790 (2012). [doi:10.1038/bjc.2012.137](https://doi.org/10.1038/bjc.2012.137) [Medline](#)
13. M. G. Krebs *et al.*, Analysis of circulating tumor cells in patients with non-small cell lung cancer using epithelial marker-dependent and -independent approaches. *J. Thorac. Oncol.* **7**, 306 (2012). [doi:10.1097/JTO.0b013e31823c5c16](https://doi.org/10.1097/JTO.0b013e31823c5c16) [Medline](#)
14. E. H. Cho *et al.*, Characterization of circulating tumor cell aggregates identified in patients with epithelial tumors. *Phys. Biol.* **9**, 016001 (2012). [doi:10.1088/1478-3975/9/1/016001](https://doi.org/10.1088/1478-3975/9/1/016001) [Medline](#)
15. M. Labelle, S. Begum, R. O. Hynes, Direct signaling between platelets and cancer cells induces an epithelial-mesenchymal-like transition and promotes metastasis. *Cancer Cell* **20**, 576 (2011). [doi:10.1016/j.ccr.2011.09.009](https://doi.org/10.1016/j.ccr.2011.09.009) [Medline](#)

16. F. Ozsolak *et al.*, Amplification-free digital gene expression profiling from minute cell quantities. *Nat. Methods* **7**, 619 (2010). [doi:10.1038/nmeth.1480](https://doi.org/10.1038/nmeth.1480) [Medline](#)
17. M. Yu *et al.*, RNA sequencing of pancreatic circulating tumour cells implicates WNT signalling in metastasis. *Nature* **487**, 510 (2012). [doi:10.1038/nature11217](https://doi.org/10.1038/nature11217) [Medline](#)
18. J. H. Taube *et al.*, Core epithelial-to-mesenchymal transition interactome gene-expression signature is associated with claudin-low and metaplastic breast cancer subtypes. *Proc. Natl. Acad. Sci. U.S.A.* **107**, 15449 (2010). [doi:10.1073/pnas.1004900107](https://doi.org/10.1073/pnas.1004900107) [Medline](#)
19. K. Polyak, R. A. Weinberg, Transitions between epithelial and mesenchymal states: acquisition of malignant and stem cell traits. *Nat. Rev. Cancer* **9**, 265 (2009). [doi:10.1038/nrc2620](https://doi.org/10.1038/nrc2620) [Medline](#)
20. N. Bloushtain-Qimron *et al.*, Cell type-specific DNA methylation patterns in the human breast. *Proc. Natl. Acad. Sci. U.S.A.* **105**, 14076 (2008). [doi:10.1073/pnas.0805206105](https://doi.org/10.1073/pnas.0805206105) [Medline](#)
21. Y. Hüsemann *et al.*, Systemic spread is an early step in breast cancer. *Cancer Cell* **13**, 58 (2008). [doi:10.1016/j.ccr.2007.12.003](https://doi.org/10.1016/j.ccr.2007.12.003) [Medline](#)
22. A. D. Rhim *et al.*, EMT and dissemination precede pancreatic tumor formation. *Cell* **148**, 349 (2012). [doi:10.1016/j.cell.2011.11.025](https://doi.org/10.1016/j.cell.2011.11.025) [Medline](#)
23. A. J. Armstrong *et al.*, Circulating tumor cells from patients with advanced prostate and breast cancer display both epithelial and mesenchymal markers. *Mol. Cancer Res.* **9**, 997 (2011). [doi:10.1158/1541-7786.MCR-10-0490](https://doi.org/10.1158/1541-7786.MCR-10-0490) [Medline](#)
24. A. Lecharpentier *et al.*, Detection of circulating tumour cells with a hybrid (epithelial/mesenchymal) phenotype in patients with metastatic non-small cell lung cancer. *Br. J. Cancer* **105**, 1338 (2011). [doi:10.1038/bjc.2011.405](https://doi.org/10.1038/bjc.2011.405) [Medline](#)
25. C. V. Pecot *et al.*, A novel platform for detection of CK+ and CK- CTCs. *Cancer Discov* **1**, 580 (2011). [doi:10.1158/2159-8290.CD-11-0215](https://doi.org/10.1158/2159-8290.CD-11-0215) [Medline](#)
26. O. Ilina, P. Friedl, Mechanisms of collective cell migration at a glance. *J. Cell Sci.* **122**, 3203 (2009). [doi:10.1242/jcs.036525](https://doi.org/10.1242/jcs.036525) [Medline](#)
27. D. G. Duda *et al.*, Malignant cells facilitate lung metastasis by bringing their own soil. *Proc. Natl. Acad. Sci. U.S.A.* **107**, 21677 (2010). [doi:10.1073/pnas.1016234107](https://doi.org/10.1073/pnas.1016234107) [Medline](#)
28. Y. N. Kim, K. H. Koo, J. Y. Sung, U. J. Yun, H. Kim, Anoikis resistance: An essential prerequisite for tumor metastasis. *Int. J. Cell Biol.* **2012**, 306879 (2012). [doi:10.1155/2012/306879](https://doi.org/10.1155/2012/306879) [Medline](#)
29. J. M. Hou *et al.*, Clinical significance and molecular characteristics of circulating tumor cells and circulating tumor microemboli in patients with small-cell lung cancer. *J. Clin. Oncol.* **30**, 525 (2012). [doi:10.1200/JCO.2010.33.3716](https://doi.org/10.1200/JCO.2010.33.3716) [Medline](#)
30. V. G. Tusher, R. Tibshirani, G. Chu, Significance analysis of microarrays applied to the ionizing radiation response. *Proc. Natl. Acad. Sci. U.S.A.* **98**, 5116 (2001). [doi:10.1073/pnas.091062498](https://doi.org/10.1073/pnas.091062498) [Medline](#)

31. A. Subramanian *et al.*, Gene set enrichment analysis: A knowledge-based approach for interpreting genome-wide expression profiles. *Proc. Natl. Acad. Sci. U.S.A.* **102**, 15545 (2005). [doi:10.1073/pnas.0506580102](https://doi.org/10.1073/pnas.0506580102) [Medline](#)
32. Y. Kang *et al.*, A multigenic program mediating breast cancer metastasis to bone. *Cancer Cell* **3**, 537 (2003). [doi:10.1016/S1535-6108\(03\)00132-6](https://doi.org/10.1016/S1535-6108(03)00132-6) [Medline](#)
33. A. J. Minn *et al.*, Genes that mediate breast cancer metastasis to lung. *Nature* **436**, 518 (2005). [doi:10.1038/nature03799](https://doi.org/10.1038/nature03799) [Medline](#)
34. P. D. Bos *et al.*, Genes that mediate breast cancer metastasis to the brain. *Nature* **459**, 1005 (2009). [doi:10.1038/nature08021](https://doi.org/10.1038/nature08021) [Medline](#)
35. Y. Benjamini, Y. Hochberg, Controlling the false discovery rate: A practical and powerful approach to multiple testing. *J. R. Stat. Soc. Ser. B* **57**, 289 (1995).
36. D. Dias-Santagata *et al.*, Rapid targeted mutational analysis of human tumours: A clinical platform to guide personalized cancer medicine. *EMBO Mol. Med.* **2**, 146 (2010); [doi:10.1002/emmm.201000070](https://doi.org/10.1002/emmm.201000070).
